# Supplementary material
Source: publisher figshare collection journal article supplement (https://gsapubs.figshare.com/articles/dataset/_/14251604)
Supplement: Supplementary file 1 [file 1]

## Sheet: PlotDat2
Source sheet	forearc	0	0
Plot name	ProbDens2	0.225	0
Plot Type	16	0.45	0
1st free col	5	0.675	0
Sigma Level	2	0.9	0
Absolute Errs	TRUE	1.125	0
Symbol Type	1	1.35	0
Inverse Plot	FALSE	1.575	0
Color Plot	TRUE	1.8	0
3D plot	FALSE	2.025	0
Linear	FALSE	2.25	0
Data Range	D3:E317	2.475	0
Filled Symbols	TRUE	2.7	0
ConcAge	FALSE	2.925	0
ConcSwap	FALSE	3.15	0
1st Symbol-row	1	3.375	0
		3.6	0
		3.825	0
		4.05	0
		4.275	0
		4.5	0
		4.725	0
		4.95	0
		5.175	0
		5.4	0
		5.625	0
		5.85	0
		6.075	0
		6.3	0
		6.525	0
		6.75	3.5253e-09
		6.975	7.08735e-09
		7.2	1.39616e-08
		7.425	2.69495e-08
		7.65	5.09717e-08
		7.875	9.44651e-08
		8.1	1.71544e-07
		8.325	3.05243e-07
		8.55	5.32204e-07
		8.775	9.09229e-07
		9	1.52206e-06
		9.225	2.49664e-06
		9.45	4.01274e-06
		9.675	6.31962e-06
		9.9	9.75222e-06
		10.125	1.47462e-05
		10.35	2.18484e-05
		10.575	3.17192e-05
		10.8	4.51311e-05
		11.025	6.29222e-05
		11.25	8.59791e-05
		11.475	0.000115167
		11.7	0.00015127
		11.925	0.000194944
		12.15	0.0002467
		12.375	0.000306963
		12.6	0.000376215
		12.825	0.0004552
		13.05	0.000545186
		13.275	0.000648078
		13.5	0.000766279
		13.725	0.000902076
		13.95	0.00105648
		14.175	0.0012277
		14.4	0.00140955
		14.625	0.00159061
		14.85	0.00175469
		15.075	0.00188351
		15.3	0.00196329
		15.525	0.00199937
		15.75	0.00204146
		15.975	0.00220026
		16.2	0.0025949
		16.425	0.00319722
		16.65	0.00371241
		16.875	0.00373913
		17.1	0.00314851
		17.325	0.00223746
		17.55	0.00145124
		17.775	0.00103555
		18	0.000980144
		18.225	0.0011722
		18.45	0.00151764
		18.675	0.00196569
		18.9	0.00251232
		19.125	0.00324034
		19.35	0.00431065
		19.575	0.00570213
		19.8	0.00691058
		20.025	0.0074988
		20.25	0.0080682
		20.475	0.00875879
		20.7	0.00775069
		20.925	0.00514633
		21.15	0.00331079
		21.375	0.00275124
		21.6	0.00270057
		21.825	0.00274584
		22.05	0.00277558
		22.275	0.00274494
		22.5	0.00263247
		22.725	0.00243997
		22.95	0.00218909
		23.175	0.00191253
		23.4	0.00164353
		23.625	0.00140741
		23.85	0.00121769
		24.075	0.00107654
		24.3	0.000978154
		24.525	0.000912934
		24.75	0.000870812
		24.975	0.000843198
		25.2	0.000823607
		25.425	0.000807514
		25.65	0.000791867
		25.875	0.000774618
		26.1	0.000754398
		26.325	0.000730322
		26.55	0.0007019
		26.775	0.000668989
		27	0.000631772
		27.225	0.000590707
		27.45	0.000546497
		27.675	0.000500019
		27.9	0.000452261
		28.125	0.000404251
		28.35	0.000356989
		28.575	0.000311393
		28.8	0.000268249
		29.025	0.000228193
		29.25	0.000191671
		29.475	0.000158958
		29.7	0.000130161
		29.925	0.000105238
		30.15	8.40271e-05
		30.375	6.62711e-05
		30.6	5.16502e-05
		30.825	3.98125e-05
		31.05	3.03852e-05
		31.275	2.30115e-05
		31.5	1.73572e-05
		31.725	1.31246e-05
		31.95	1.00601e-05
		32.175	7.97274e-06
		32.4	6.72468e-06
		32.625	6.26078e-06
		32.85	6.60952e-06
		33.075	7.91906e-06
		33.3	1.04825e-05
		33.525	1.47834e-05
		33.75	2.15529e-05
		33.975	3.18448e-05
		34.2	4.71325e-05
		34.425	6.9421e-05
		34.65	0.00010141
		34.875	0.00014673
		35.1	0.000210387
		35.325	0.000299695
		35.55	0.000425966
		35.775	0.000606748
		36	0.000866879
		36.225	0.00123448
		36.45	0.00172768
		36.675	0.00233289
		36.9	0.00298561
		37.125	0.00357198
		37.35	0.00396248
		37.575	0.00406591
		37.8	0.00387146
		38.025	0.00345031
		38.25	0.0029167
		38.475	0.00237666
		38.7	0.00189574
		38.925	0.00149639
		39.15	0.00117426
		39.375	0.000916106
		39.6	0.000709956
		39.825	0.000547373
		40.05	0.000422139
		40.275	0.000328694
		40.5	0.000261551
		40.725	0.000215484
		40.95	0.000186015
		41.175	0.000169956
		41.4	0.000165955
		41.625	0.000175133
		41.85	0.000201697
		42.075	0.000253174
		42.3	0.000339634
		42.525	0.000471187
		42.75	0.000653558
		42.975	0.000882656
		43.2	0.00114032
		43.425	0.00139408
		43.65	0.00160281
		43.875	0.00172752
		44.1	0.00174353
		44.325	0.00164889
		44.55	0.00146504
		44.775	0.00122941
		45	0.000983489
		45.225	0.000761438
		45.45	0.000583532
		45.675	0.000455534
		45.9	0.00037244
		46.125	0.000323872
		46.35	0.000298641
		46.575	0.000287488
		46.8	0.000283972
		47.025	0.000284207
		47.25	0.000286174
		47.475	0.000289038
		47.7	0.000292708
		47.925	0.000297596
		48.15	0.000304572
		48.375	0.000315017
		48.6	0.000330876
		48.825	0.000354713
		49.05	0.000389644
		49.275	0.000439085
		49.5	0.000506297
		49.725	0.000593715
		49.95	0.000702164
		50.175	0.000830106
		50.4	0.000973166
		50.625	0.00112417
		50.85	0.00127379
		51.075	0.00141196
		51.3	0.00152959
		51.525	0.00162053
		51.75	0.001683
		51.975	0.00172036
		52.2	0.00174072
		52.425	0.00175564
		52.65	0.00177807
		52.875	0.00182005
		53.1	0.00189059
		53.325	0.00199433
		53.55	0.00213099
		53.775	0.00229578
		54	0.00248055
		54.225	0.00267539
		54.45	0.00287045
		54.675	0.00305751
		54.9	0.00323141
		55.125	0.00339095
		55.35	0.00353975
		55.575	0.00368721
		55.8	0.00385008
		56.025	0.00405421
		56.25	0.00433494
		56.475	0.00473276
		56.7	0.0052822
		56.925	0.00604065
		57.15	0.00763364
		57.375	0.0116315
		57.6	0.0144567
		57.825	0.0119213
		58.05	0.00985256
		58.275	0.00954199
		58.5	0.00939055
		58.725	0.00908542
		58.95	0.00866253
		59.175	0.00817005
		59.4	0.00765016
		59.625	0.00713907
		59.85	0.00666429
		60.075	0.00624103
		60.3	0.00587153
		60.525	0.00554899
		60.75	0.00526442
		60.975	0.00501351
		61.2	0.00480094
		61.425	0.00464142
		61.65	0.00455761
		61.875	0.00457629
		62.1	0.00472366
		62.325	0.00502127
		62.55	0.00548376
		62.775	0.00611953
		63	0.00693368
		63.225	0.00792897
		63.45	0.00909727
		63.675	0.0103985
		63.9	0.011738
		64.125	0.0129672
		64.35	0.0139265
		64.575	0.0145203
		64.8	0.0147905
		65.025	0.0149678
		65.25	0.0154235
		65.475	0.0163272
		65.7	0.0171663
		65.925	0.0170204
		66.15	0.015662
		66.375	0.0138228
		66.6	0.0122106
		66.825	0.0109249
		67.05	0.00978923
		67.275	0.00870906
		67.5	0.00769884
		67.725	0.00681028
		67.95	0.00611809
		68.175	0.00578125
		68.4	0.00607473
		68.625	0.00710514
		68.85	0.00830476
		69.075	0.00869951
		69.3	0.00804525
		69.525	0.00701195
		69.75	0.00612436
		69.975	0.00532043
		70.2	0.00443408
		70.425	0.00351012
		70.65	0.00269696
		70.875	0.00208703
		71.1	0.00167937
		71.325	0.00142072
		71.55	0.00125236
		71.775	0.00113199
		72	0.00103515
		72.225	0.000949415
		72.45	0.00086902
		72.675	0.00079169
		72.9	0.000716967
		73.125	0.00064526
		73.35	0.000577322
		73.575	0.000513958
		73.8	0.000455818
		74.025	0.000403346
		74.25	0.000356733
		74.475	0.000315934
		74.7	0.000280696
		74.925	0.00025062
		75.15	0.000225185
		75.375	0.000203826
		75.6	0.000185951
		75.825	0.000171002
		76.05	0.000158442
		76.275	0.000147815
		76.5	0.000138725
		76.725	0.000130845
		76.95	0.000123915
		77.175	0.000117732
		77.4	0.000112144
		77.625	0.000107032
		77.85	0.000102318
		78.075	9.79576e-05
		78.3	9.3904e-05
		78.525	9.01515e-05
		78.75	8.66834e-05
		78.975	8.35054e-05
		79.2	8.06386e-05
		79.425	7.80904e-05
		79.65	7.58958e-05
		79.875	7.41074e-05
		80.1	7.27716e-05
		80.325	7.1981e-05
		80.55	7.18267e-05
		80.775	7.24269e-05
		81	7.39363e-05
		81.225	7.65512e-05
		81.45	8.04999e-05
		81.675	8.60512e-05
		81.9	9.35317e-05
		82.125	0.000103312
		82.35	0.000115812
		82.575	0.000131512
		82.8	0.000150942
		83.025	0.000174694
		83.25	0.000203414
		83.475	0.000237824
		83.7	0.000278721
		83.925	0.000326999
		84.15	0.00038366
		84.375	0.000449863
		84.6	0.000526925
		84.825	0.000616395
		85.05	0.000720072
		85.275	0.000840051
		85.5	0.000978761
		85.725	0.00113901
		85.95	0.00132396
		86.175	0.00153716
		86.4	0.00178254
		86.625	0.00206431
		86.85	0.002387
		87.075	0.00275528
		87.3	0.003174
		87.525	0.00364807
		87.75	0.00418248
		87.975	0.00478214
		88.2	0.00545182
		88.425	0.00619564
		88.65	0.00701626
		88.875	0.00791355
		89.1	0.00888277
		89.325	0.00991255
		89.55	0.0109835
		89.775	0.0120685
		90	0.0131363
		90.225	0.0141604
		90.45	0.0151328
		90.675	0.0160769
		90.9	0.0170453
		91.125	0.0180849
		91.35	0.0191749
		91.575	0.0201736
		91.8	0.0208303
		92.025	0.0208811
		92.25	0.0201881
		92.475	0.0188295
		92.7	0.0170747
		92.925	0.0152543
		93.15	0.01362
		93.375	0.0122843
		93.6	0.0112523
		93.825	0.0104863
		94.05	0.00994935
		94.275	0.00961392
		94.5	0.00945471
		94.725	0.00944111
		94.95	0.00953578
		95.175	0.00969748
		95.4	0.00988619
		95.625	0.0100682
		95.85	0.0102209
		96.075	0.0103375
		96.3	0.0104353
		96.525	0.0105709
		96.75	0.0108491
		96.975	0.0113834
		97.2	0.0121747
		97.425	0.0129952
		97.65	0.0134686
		97.875	0.0133665
		98.1	0.0128177
		98.325	0.0121709
		98.55	0.0116859
		98.775	0.011395
		99	0.0111916
		99.225	0.0109656
		99.45	0.0106593
		99.675	0.0102625
		99.9	0.0097911
		100.125	0.00927242
		100.35	0.00873682
		100.575	0.00821203
		100.8	0.00771991
		101.025	0.00727482
		101.25	0.00688313
		101.475	0.00654358
		101.7	0.00624837
		101.925	0.00598504
		102.15	0.00573946
		102.375	0.00549961
		102.6	0.00525969
		102.825	0.00502351
		103.05	0.00480603
		103.275	0.00463165
		103.5	0.00452844
		103.725	0.00451834
		103.95	0.00460589
		104.175	0.00477013
		104.4	0.00496597
		104.625	0.00514017
		104.85	0.00526599
		105.075	0.00539391
		105.3	0.00568028
		105.525	0.00629528
		105.75	0.00718236
		105.975	0.00794124
		106.2	0.00816309
		106.425	0.00791669
		106.65	0.00769709
		106.875	0.00788679
		107.1	0.00844557
		107.325	0.00908031
		107.55	0.00954254
		107.775	0.00977029
		108	0.00986749
		108.225	0.0100022
		108.45	0.0102991
		108.675	0.0107836
		108.9	0.0114001
		109.125	0.0120831
		109.35	0.0128219
		109.575	0.0136481
		109.8	0.0145236
		110.025	0.0152524
		110.25	0.0155895
		110.475	0.0155032
		110.7	0.0152912
		110.925	0.0153866
		111.15	0.0160391
		111.375	0.0171002
		111.6	0.0180088
		111.825	0.0180655
		112.05	0.0169279
		112.275	0.0148725
		112.5	0.0125132
		112.725	0.0103285
		112.95	0.00849354
		113.175	0.00700949
		113.4	0.00584569
		113.625	0.004978
		113.85	0.00437533
		114.075	0.00398967
		114.3	0.00375991
		114.525	0.00362238
		114.75	0.00352199
		114.975	0.00342022
		115.2	0.00329853
		115.425	0.00315629
		115.65	0.00300475
		115.875	0.00285888
		116.1	0.00273022
		116.325	0.00262246
		116.55	0.00253073
		116.775	0.00244405
		117	0.00234938
		117.225	0.0022356
		117.45	0.00209641
		117.675	0.00193135
		117.9	0.00174534
		118.125	0.001547
		118.35	0.00134661
		118.575	0.00115408
		118.8	0.000977445
		119.025	0.00082209
		119.25	0.000690516
		119.475	0.000582713
		119.7	0.00049681
		119.925	0.000429792
		120.15	0.000378205
		120.375	0.000338655
		120.6	0.000308166
		120.825	0.000284359
		121.05	0.000265581
		121.275	0.000250916
		121.5	0.000240336
		121.725	0.000234816
		121.95	0.000236548
		122.175	0.000249068
		122.4	0.000277192
		122.625	0.000326543
		122.85	0.000402511
		123.075	0.000508599
		123.3	0.000644456
		123.525	0.000804089
		123.75	0.000975045
		123.975	0.00113921
		124.2	0.00127546
		124.425	0.00136381
		124.65	0.0013899
		124.875	0.00134853
		125.1	0.00124495
		125.325	0.00109355
		125.55	0.000914335
		125.775	0.000728446
		126	0.000553992
		126.225	0.000403414
		126.45	0.000282681
		126.675	0.000192119
		126.9	0.000128177
		127.125	8.54016e-05
		127.35	5.80434e-05
		127.575	4.1096e-05
		127.8	3.07195e-05
		128.025	2.4257e-05
		128.25	2.00236e-05
		128.475	1.70301e-05
		128.7	1.4734e-05
		128.925	1.2854e-05
		129.15	1.12499e-05
		129.375	9.85171e-06
		129.6	8.61993e-06
		129.825	7.53762e-06
		130.05	6.58865e-06
		130.275	5.75812e-06
		130.5	5.03542e-06
		130.725	4.41083e-06
		130.95	3.87552e-06
		131.175	3.42156e-06
		131.4	3.04189e-06
		131.625	2.72734e-06
		131.85	2.47934e-06
		132.075	2.28973e-06
		132.3	2.155e-06
		132.525	2.07669e-06
		132.75	2.04731e-06
		132.975	2.07221e-06
		133.2	2.14605e-06
		133.425	2.27782e-06
		133.65	2.46397e-06
		133.875	2.71276e-06
		134.1	3.03136e-06
		134.325	3.42941e-06
		134.55	3.92376e-06
		134.775	4.52456e-06
		135	5.25608e-06
		135.225	6.14576e-06
		135.45	7.22842e-06
		135.675	8.54792e-06
		135.9	1.0159e-05
		136.125	1.21329e-05
		136.35	1.45477e-05
		136.575	1.75063e-05
		136.8	2.11294e-05
		137.025	2.55593e-05
		137.25	3.09704e-05
		137.475	3.7564e-05
		137.7	4.56174e-05
		137.925	5.55668e-05
		138.15	6.82437e-05
		138.375	8.54106e-05
		138.6	0.000110721
		138.825	0.000151092
		139.05	0.000218163
		139.275	0.000328361
		139.5	0.000499951
		139.725	0.000745676
		139.95	0.00106216
		140.175	0.00142092
		140.4	0.00176812
		140.625	0.00203747
		140.85	0.00217367
		141.075	0.00215542
		141.3	0.00200532
		141.525	0.00178095
		141.75	0.00155248
		141.975	0.00137927
		142.2	0.00129654
		142.425	0.00131504
		142.65	0.00142942
		142.875	0.00162812
		143.1	0.00190005
		143.325	0.00223685
		143.55	0.0026323
		143.775	0.00308102
		144	0.003578
		144.225	0.00411946
		144.45	0.0047048
		144.675	0.00533836
		144.9	0.00602967
		145.125	0.00679039
		145.35	0.00762787
		145.575	0.00853667
		145.8	0.0094925
		146.025	0.0104531
		146.25	0.0113688
		146.475	0.0122003
		146.7	0.0129333
		146.925	0.013581
		147.15	0.0141665
		147.375	0.0146932
		147.6	0.0151239
		147.825	0.0153889
		148.05	0.0154278
		148.275	0.0152416
		148.5	0.0149208
		148.725	0.0146265
		148.95	0.0145209
		149.175	0.0146688
		149.4	0.0149656
		149.625	0.0151691
		149.85	0.015053
		150.075	0.0145752
		150.3	0.0139033
		150.525	0.0132755
		150.75	0.0128346
		150.975	0.0125686
		151.2	0.0123658
		151.425	0.012102
		151.65	0.0116997
		151.875	0.0111476
		152.1	0.0104876
		152.325	0.00978405
		152.55	0.00908899
		152.775	0.00842288
		153	0.00777894
		153.225	0.00714487
		153.45	0.00652357
		153.675	0.00593768
		153.9	0.00541661
		154.125	0.0049778
		154.35	0.00461636
		154.575	0.00430886
		154.8	0.00402657
		155.025	0.00374877
		155.25	0.00346919
		155.475	0.00319437
		155.7	0.00293723
		155.925	0.00271053
		156.15	0.00252323
		156.375	0.0023814
		156.6	0.00229366
		156.825	0.00227934
		157.05	0.00237362
		157.275	0.00261847
		157.5	0.00303121
		157.725	0.00356164
		157.95	0.00407589
		158.175	0.00440316
		158.4	0.00443121
		158.625	0.00417924
		158.85	0.00378387
		159.075	0.00341115
		159.3	0.00316968
		159.525	0.00308381
		159.75	0.0031227
		159.975	0.0032434
		160.2	0.0034171
		160.425	0.00363434
		160.65	0.00389944
		160.875	0.00422277
		161.1	0.00461394
		161.325	0.00507658
		161.55	0.00560509
		161.775	0.0061842
		162	0.00679205
		162.225	0.00740598
		162.45	0.00800899
		162.675	0.00859469
		162.9	0.00916883
		163.125	0.00974797
		163.35	0.010357
		163.575	0.0110269
		163.8	0.0117922
		164.025	0.0126838
		164.25	0.0137141
		164.475	0.014856
		164.7	0.0160252
		164.925	0.0170825
		165.15	0.0178658
		165.375	0.0182427
		165.6	0.0181621
		165.825	0.0176759
		166.05	0.0169207
		166.275	0.0160714
		166.5	0.0152896
		166.725	0.0146876
		166.95	0.0143145
		167.175	0.0141581
		167.4	0.0141559
		167.625	0.014211
		167.85	0.0142107
		168.075	0.0140512
		168.3	0.0136625
		168.525	0.0130275
		168.75	0.0121873
		168.975	0.0112285
		169.2	0.0102575
		169.425	0.00937303
		169.65	0.00864675
		169.875	0.00811634
		170.1	0.00778886
		170.325	0.00764729
		170.55	0.00765576
		170.775	0.00776385
		171	0.00791381
		171.225	0.00805244
		171.45	0.00814511
		171.675	0.00818463
		171.9	0.00818971
		172.125	0.00819266
		172.35	0.00822277
		172.575	0.00829328
		172.8	0.00839714
		173.025	0.0085113
		173.25	0.00860556
		173.475	0.00865156
		173.7	0.00862905
		173.925	0.00852873
		174.15	0.00835211
		174.375	0.00810915
		174.6	0.00781441
		174.825	0.00748279
		175.05	0.00712584
		175.275	0.00674994
		175.5	0.00635662
		175.725	0.00594506
		175.95	0.00551519
		176.175	0.00507041
		176.4	0.00461855
		176.625	0.00417092
		176.85	0.0037399
		177.075	0.00333636
		177.3	0.0029676
		177.525	0.00263672
		177.75	0.00234314
		177.975	0.00208385
		178.2	0.00185493
		178.425	0.00165265
		178.65	0.0014741
		178.875	0.00131732
		179.1	0.00118106
		179.325	0.00106445
		179.55	0.000966643
		179.775	0.000886606
		180	0.000822975
		180.225	0.000774097
		180.45	0.000738054
		180.675	0.000712782
		180.9	0.000696177
		181.125	0.000686198
		181.35	0.000680936
		181.575	0.000678667
		181.8	0.000677887
		182.025	0.000677326
		182.25	0.000675955
		182.475	0.000672961
		182.7	0.000667742
		182.925	0.00065989
		183.15	0.000649164
		183.375	0.000635478
		183.6	0.000618871
		183.825	0.000599497
		184.05	0.000577598
		184.275	0.000553487
		184.5	0.000527529
		184.725	0.00050013
		184.95	0.000471702
		185.175	0.000442674
		185.4	0.000413448
		185.625	0.000384411
		185.85	0.000355911
		186.075	0.000328262
		186.3	0.000301725
		186.525	0.000276512
		186.75	0.000252783
		186.975	0.000230657
		187.2	0.000210194
		187.425	0.000191425
		187.65	0.000174332
		187.875	0.000158871
		188.1	0.00014497
		188.325	0.00013254
		188.55	0.000121474
		188.775	0.000111659
		189	0.000102976
		189.225	9.53077e-05
		189.45	8.85375e-05
		189.675	8.25556e-05
		189.9	7.72592e-05
		190.125	7.25541e-05
		190.35	6.83555e-05
		190.575	6.45882e-05
		190.8	6.11862e-05
		191.025	5.80928e-05
		191.25	5.52593e-05
		191.475	5.2645e-05
		191.7	5.02157e-05
		191.925	4.79435e-05
		192.15	4.58054e-05
		192.375	4.37829e-05
		192.6	4.18611e-05
		192.825	4.00282e-05
		193.05	3.82747e-05
		193.275	3.65933e-05
		193.5	3.49781e-05
		193.725	3.34245e-05
		193.95	3.19289e-05
		194.175	3.04882e-05
		194.4	2.91002e-05
		194.625	2.77628e-05
		194.85	2.64743e-05
		195.075	2.52332e-05
		195.3	2.40383e-05
		195.525	2.28857e-05
		195.75	2.17803e-05
		195.975	2.07173e-05
		196.2	1.96956e-05
		196.425	1.87143e-05
		196.65	1.77724e-05
		196.875	1.6866e-05
		197.1	1.60002e-05
		197.325	1.51707e-05
		197.55	1.43765e-05
		197.775	1.36165e-05
		198	1.28897e-05
		198.225	1.21952e-05
		198.45	1.15318e-05
		198.675	1.08986e-05
		198.9	1.02946e-05
		199.125	9.71889e-06
		199.35	9.17038e-06
		199.575	8.65153e-06
		199.8	8.15708e-06
		200.025	7.6887e-06
		200.25	7.24649e-06
		200.475	6.83118e-06
		200.7	6.44438e-06
		200.925	6.08902e-06
		201.15	5.77368e-06
		201.375	5.50289e-06
		201.6	5.29214e-06
		201.825	5.16283e-06
		202.05	5.14763e-06
		202.275	5.29608e-06
		202.5	5.68252e-06
		202.725	6.41753e-06
		202.95	7.66372e-06
		203.175	9.65671e-06
		203.4	1.2732e-05
		203.625	1.7367e-05
		203.85	2.41872e-05
		204.075	3.40398e-05
		204.3	4.80009e-05
		204.525	6.73933e-05
		204.75	9.3771e-05
		204.975	0.000128865
		205.2	0.000174476
		205.425	0.000232319
		205.65	0.000303812
		205.875	0.000389839
		206.1	0.000490511
		206.325	0.000604971
		206.55	0.000731277
		206.775	0.00086643
		207	0.00100655
		207.225	0.00114719
		207.45	0.00128379
		207.675	0.00141222
		207.9	0.00152919
		208.125	0.00163271
		208.35	0.0017222
		208.575	0.00179854
		208.8	0.00186375
		209.025	0.00192061
		209.25	0.00197212
		209.475	0.002021
		209.7	0.0020693
		209.925	0.0021181
		210.15	0.00216748
		210.375	0.00221661
		210.6	0.00226391
		210.825	0.00230726
		211.05	0.00234423
		211.275	0.00237218
		211.5	0.00238837
		211.725	0.00238993
		211.95	0.00237402
		212.175	0.00233793
		212.4	0.00227935
		212.625	0.00219668
		212.85	0.00208945
		213.075	0.00195858
		213.3	0.00180658
		213.525	0.00163757
		213.75	0.00145695
		213.975	0.00127103
		214.2	0.00108637
		214.425	0.000909209
		214.65	0.000744893
		214.875	0.000597462
		215.1	0.000469448
		215.325	0.000361892
		215.55	0.000274501
		215.775	0.00020596
		216	0.000154313
		216.225	0.00011735
		216.45	9.30053e-05
		216.675	7.97643e-05
		216.9	7.71277e-05
		217.125	8.61617e-05
		217.35	0.000110112
		217.575	0.000154913
		217.8	0.00022922
		218.025	0.000343436
		218.25	0.000507297
		218.475	0.000725998
		218.7	0.000995735
		218.925	0.00130045
		219.15	0.00161177
		219.375	0.0018935
		219.6	0.00210998
		219.825	0.00223565
		220.05	0.00226218
		220.275	0.00219996
		220.5	0.00207361
		220.725	0.00191351
		220.95	0.00174699
		221.175	0.00159244
		221.4	0.00145777
		221.625	0.00134251
		221.85	0.00124163
		222.075	0.0011493
		222.3	0.00106127
		222.525	0.000975648
		222.75	0.00089264
		222.975	0.000813662
		223.2	0.000740468
		223.425	0.000674499
		223.65	0.000616546
		223.875	0.000566675
		224.1	0.000524332
		224.325	0.000488528
		224.55	0.000458053
		224.775	0.000431652
		225	0.000408168
		225.225	0.000386628
		225.45	0.000366276
		225.675	0.000346581
		225.9	0.000327212
		226.125	0.000308004
		226.35	0.000288918
		226.575	0.000270003
		226.8	0.000251366
		227.025	0.000233147
		227.25	0.000215487
		227.475	0.000198531
		227.7	0.000182411
		227.925	0.000167238
		228.15	0.000153103
		228.375	0.000140073
		228.6	0.000128195
		228.825	0.000117497
		229.05	0.000107979
		229.275	9.96375e-05
		229.5	9.24581e-05
		229.725	8.64285e-05
		229.95	8.15523e-05
		230.175	7.78694e-05
		230.4	7.54869e-05
		230.625	7.46213e-05
		230.85	7.56538e-05
		231.075	7.91967e-05
		231.3	8.61624e-05
		231.525	9.78209e-05
		231.75	0.000115823
		231.975	0.00014216
		232.2	0.000179027
		232.425	0.000228569
		232.65	0.000292517
		232.875	0.000371713
		233.1	0.000465641
		233.325	0.000572009
		233.55	0.000686546
		233.775	0.000803089
		234	0.000914043
		234.225	0.00101119
		234.45	0.00108674
		234.675	0.00113449
		234.9	0.00115077
		235.125	0.00113514
		235.35	0.00109053
		235.575	0.00102292
		235.8	0.00094051
		236.025	0.000852712
		236.25	0.000768996
		236.475	0.000697882
		236.7	0.00064618
		236.925	0.00061853
		237.15	0.000617227
		237.375	0.000642275
		237.6	0.000691581
		237.825	0.00076124
		238.05	0.00084587
		238.275	0.000939004
		238.5	0.00103355
		238.725	0.00112232
		238.95	0.00119862
		239.175	0.00125685
		239.4	0.00129305
		239.625	0.00130542
		239.85	0.00129475
		240.075	0.00126499
		240.3	0.00122418
		240.525	0.00118588
		240.75	0.0011706
		240.975	0.00120576
		241.2	0.00132141
		241.425	0.00153994
		241.65	0.00186139
		241.875	0.00225147
		242.1	0.0026423
		242.325	0.00295155
		242.55	0.00311349
		242.775	0.00310555
		243	0.0029542
		243.225	0.00271714
		243.45	0.0024543
		243.675	0.00220518
		243.9	0.00198291
		244.125	0.0017825
		244.35	0.00159398
		244.575	0.00141162
		244.8	0.00123665
		245.025	0.00107497
		245.25	0.000933391
		245.475	0.00081675
		245.7	0.000726691
		245.925	0.000661904
		246.15	0.000619113
		246.375	0.000594221
		246.6	0.000583223
		246.825	0.000582738
		247.05	0.00059021
		247.275	0.000603863
		247.5	0.000622533
		247.725	0.000645466
		247.95	0.000672132
		248.175	0.00070209
		248.4	0.000734895
		248.625	0.000770041
		248.85	0.000806937
		249.075	0.000844895
		249.3	0.000883142
		249.525	0.000920823
		249.75	0.000957034
		249.975	0.000990841
		250.2	0.00102132
		250.425	0.00104757
		250.65	0.00106878
		250.875	0.00108422
		251.1	0.00109333
		251.325	0.00109567
		251.55	0.00109102
		251.775	0.00107934
		252	0.00106079
		252.225	0.00103575
		252.45	0.00100477
		252.675	0.000968605
		252.9	0.000928129
		253.125	0.00088435
		253.35	0.000838354
		253.575	0.000791274
		253.8	0.000744235
		254.025	0.000698335
		254.25	0.000654598
		254.475	0.00061394
		254.7	0.000577145
		254.925	0.000544842
		255.15	0.000517488
		255.375	0.000495363
		255.6	0.000478563
		255.825	0.00046701
		256.05	0.000460463
		256.275	0.000458524
		256.5	0.000460673
		256.725	0.000466287
		256.95	0.000474667
		257.175	0.000485066
		257.4	0.000496726
		257.625	0.000508904
		257.85	0.000520902
		258.075	0.000532095
		258.3	0.000541956
		258.525	0.000550073
		258.75	0.000556165
		258.975	0.000560092
		259.2	0.000561851
		259.425	0.000561581
		259.65	0.00055954
		259.875	0.000556095
		260.1	0.000551704
		260.325	0.000546872
		260.55	0.00054213
		260.775	0.000538003
		261	0.000534977
		261.225	0.000533456
		261.45	0.000533751
		261.675	0.000536047
		261.9	0.000540393
		262.125	0.000546689
		262.35	0.000554689
		262.575	0.000564014
		262.8	0.000574165
		263.025	0.000584552
		263.25	0.000594526
		263.475	0.000603412
		263.7	0.000610563
		263.925	0.000615372
		264.15	0.000617344
		264.375	0.000616099
		264.6	0.00061142
		264.825	0.000603264
		265.05	0.000591778
		265.275	0.000577294
		265.5	0.000560334
		265.725	0.00054157
		265.95	0.000521835
		266.175	0.000502073
		266.4	0.000483396
		266.625	0.000467241
		266.85	0.000455877
		267.075	0.000453522
		267.3	0.000468321
		267.525	0.00051463
		267.75	0.000613931
		267.975	0.000791061
		268.2	0.00106314
		268.425	0.0014229
		268.65	0.00182524
		268.875	0.00218991
		269.1	0.0024269
		269.325	0.00247533
		269.55	0.00233352
		269.775	0.00206038
		270	0.00174714
		270.225	0.0014783
		270.45	0.0013046
		270.675	0.00123823
		270.9	0.00126495
		271.125	0.00136013
		271.35	0.00149974
		271.575	0.00166412
		271.8	0.00183726
		272.025	0.00200498
		272.25	0.0021539
		272.475	0.00227163
		272.7	0.00234769
		272.925	0.00237476
		273.15	0.00234956
		273.375	0.0022733
		273.6	0.00215143
		273.825	0.00199286
		274.05	0.00180872
		274.275	0.00161108
		274.5	0.00141161
		274.725	0.00122057
		274.95	0.00104609
		275.175	0.000893921
		275.4	0.000767449
		275.625	0.000668056
		275.85	0.000595645
		276.075	0.000549245
		276.3	0.000527611
		276.525	0.000529683
		276.75	0.000554869
		276.975	0.000603055
		277.2	0.000674328
		277.425	0.000768435
		277.65	0.000884083
		277.875	0.00101822
		278.1	0.00116551
		278.325	0.00131818
		278.55	0.00146647
		278.775	0.0015996
		279	0.00170717
		279.225	0.00178079
		279.45	0.00181548
		279.675	0.00181061
		279.9	0.00177002
		280.125	0.00170148
		280.35	0.0016155
		280.575	0.00152379
		280.8	0.0014379
		281.025	0.00136824
		281.25	0.00132366
		281.475	0.00131163
		281.7	0.00133885
		281.925	0.0014118
		282.15	0.00153697
		282.375	0.00172042
		282.6	0.00196647
		282.825	0.00227582
		283.05	0.00264364
		283.275	0.00305838
		283.5	0.00350203
		283.725	0.00395209
		283.95	0.00438497
		284.175	0.00477979
		284.4	0.00512157
		284.625	0.00540261
		284.85	0.00562204
		285.075	0.00578372
		285.3	0.00589362
		285.525	0.00595768
		285.75	0.00598078
		285.975	0.00596687
		286.2	0.00591996
		286.425	0.00584525
		286.65	0.00575001
		286.875	0.0056439
		287.1	0.00553878
		287.325	0.00544809
		287.55	0.00538589
		287.775	0.00536546
		288	0.00539756
		288.225	0.00548824
		288.45	0.00563687
		288.675	0.00583475
		288.9	0.00606526
		289.125	0.00630609
		289.35	0.0065335
		289.575	0.00672779
		289.8	0.00687858
		290.025	0.00698782
		290.25	0.00706881
		290.475	0.007141
		290.7	0.00722145
		290.925	0.00731616
		291.15	0.00741447
		291.375	0.00748969
		291.6	0.00750599
		291.825	0.00742954
		292.05	0.00723972
		292.275	0.00693633
		292.5	0.0065407
		292.725	0.00609075
		292.95	0.00563226
		293.175	0.00520936
		293.4	0.00485675
		293.625	0.00459544
		293.85	0.00443212
		294.075	0.00436154
		294.3	0.00437019
		294.525	0.00444003
		294.75	0.0045511
		294.975	0.00468293
		295.2	0.00481523
		295.425	0.00492838
		295.65	0.00500441
		295.875	0.00502837
		296.1	0.00498989
		296.325	0.00488432
		296.55	0.00471306
		296.775	0.00448296
		297	0.00420493
		297.225	0.00389207
		297.45	0.0035579
		297.675	0.00321494
		297.9	0.00287381
		298.125	0.00254297
		298.35	0.00222877
		298.575	0.00193573
		298.8	0.0016669
		299.025	0.00142414
		299.25	0.00120832
		299.475	0.00101955
		299.7	0.000857264
		299.925	0.000720435
		300.15	0.000607826
		300.375	0.000518216
		300.6	0.000450711
		300.825	0.000404973
		301.05	0.000381354
		301.275	0.000380837
		301.5	0.000404731
		301.725	0.000454152
		301.95	0.000529163
		302.175	0.000627961
		302.4	0.000746114
		302.625	0.000876202
		302.85	0.00100805
		303.075	0.00112971
		303.3	0.00122899
		303.525	0.00129538
		303.75	0.00132194
		303.975	0.0013065
		304.2	0.00125213
		304.425	0.00116652
		304.65	0.00106058
		304.875	0.000946494
		305.1	0.000835842
		305.325	0.000738024
		305.55	0.000659392
		305.775	0.000603064
		306	0.00056932
		306.225	0.000556339
		306.45	0.000561057
		306.675	0.000579918
		306.9	0.000609435
		307.125	0.000646514
		307.35	0.000688585
		307.575	0.000733589
		307.8	0.000779893
		308.025	0.000826186
		308.25	0.000871388
		308.475	0.000914552
		308.7	0.000954848
		308.925	0.000991511
		309.15	0.00102385
		309.375	0.00105123
		309.6	0.00107312
		309.825	0.00108908
		310.05	0.00109873
		310.275	0.00110187
		310.5	0.00109836
		310.725	0.00108823
		310.95	0.00107161
		311.175	0.00104878
		311.4	0.00102012
		311.625	0.000986123
		311.85	0.000947382
		312.075	0.000904569
		312.3	0.000858419
		312.525	0.000809695
		312.75	0.000759188
		312.975	0.00070768
		313.2	0.000655929
		313.425	0.000604646
		313.65	0.00055448
		313.875	0.000506005
		314.1	0.000459707
		314.325	0.000415981
		314.55	0.000375126
		314.775	0.000337347
		315	0.000302763
		315.225	0.000271408
		315.45	0.000243245
		315.675	0.000218178
		315.9	0.000196063
		316.125	0.000176717
		316.35	0.000159937
		316.575	0.000145505
		316.8	0.000133202
		317.025	0.000122815
		317.25	0.000114144
		317.475	0.000107006
		317.7	0.000101249
		317.925	9.67363e-05
		318.15	9.33631e-05
		318.375	9.10466e-05
		318.6	8.97396e-05
		318.825	8.94089e-05
		319.05	9.00464e-05
		319.275	9.16627e-05
		319.5	9.42838e-05
		319.725	9.79474e-05
		319.95	0.000102699
		320.175	0.000108588
		320.4	0.000115664
		320.625	0.000123971
		320.85	0.000133541
		321.075	0.000144406
		321.3	0.000156563
		321.525	0.000169998
		321.75	0.000184672
		321.975	0.000200519
		322.2	0.000217449
		322.425	0.000235341
		322.65	0.000254049
		322.875	0.000273406
		323.1	0.000293225
		323.325	0.000313315
		323.55	0.00033348
		323.775	0.00035354
		324	0.000373341
		324.225	0.000392777
		324.45	0.000411801
		324.675	0.000430447
		324.9	0.000448841
		325.125	0.00046721
		325.35	0.000485887
		325.575	0.000505297
		325.8	0.000525941
		326.025	0.000548364
		326.25	0.000573104
		326.475	0.00060067
		326.7	0.00063154
		326.925	0.000666295
		327.15	0.000705979
		327.375	0.000752858
		327.6	0.000811601
		327.825	0.000890568
		328.05	0.00100227
		328.275	0.00116151
		328.5	0.00137983
		328.725	0.00165674
		328.95	0.00197098
		329.175	0.00227765
		329.4	0.00251613
		329.625	0.00262853
		329.85	0.00258144
		330.075	0.00237968
		330.3	0.00206461
		330.525	0.00169766
		330.75	0.00133841
		330.975	0.00102786
		331.2	0.0007829
		331.425	0.000600922
		331.65	0.000469003
		331.875	0.000372246
		332.1	0.000298558
		332.325	0.000239966
		332.55	0.000191929
		332.775	0.000152059
		333	0.00011905
		333.225	9.20249e-05
		333.45	7.0233e-05
		333.675	5.29494e-05
		333.9	3.94713e-05
		334.125	2.91266e-05
		334.35	2.13074e-05
		334.575	1.54801e-05
		334.8	1.11927e-05
		335.025	8.0737e-06
		335.25	5.8261e-06
		335.475	4.21834e-06
		335.7	3.07395e-06
		335.925	2.26122e-06
		336.15	1.68363e-06
		336.375	1.27162e-06
		336.6	9.75733e-07
		336.825	7.61205e-07
		337.05	6.03802e-07
		337.275	4.86717e-07
		337.5	3.9831e-07
		337.725	3.30506e-07
		337.95	2.77679e-07
		338.175	2.33729e-07
		338.4	2.01197e-07
		338.625	1.74375e-07
		338.85	1.52045e-07
		339.075	1.3327e-07
		339.3	1.17331e-07
		339.525	1.03674e-07
		339.75	9.18742e-08
		339.975	7.86843e-08
		340.2	7.06205e-08
		340.425	6.33346e-08
		340.65	5.6757e-08
		340.875	5.08237e-08
		341.1	4.54758e-08
		341.325	4.06595e-08
		341.55	3.63256e-08
		341.775	3.24288e-08
		342	2.89279e-08
		342.225	2.57852e-08
		342.45	2.29663e-08
		342.675	2.044e-08
		342.9	1.81777e-08
		343.125	1.61534e-08
		343.35	1.43436e-08
		343.575	1.27268e-08
		343.8	1.12836e-08
		344.025	9.9964e-09
		344.25	8.84929e-09
		344.475	7.82783e-09
		344.7	6.91898e-09
		344.925	6.11097e-09
		345.15	5.3932e-09
		345.375	4.7561e-09
		345.6	4.19105e-09
		345.825	3.69031e-09
		346.05	3.24691e-09
		346.275	0
		346.5	0
		346.725	0
		346.95	0
		347.175	0
		347.4	0
		347.625	0
		347.85	0
		348.075	0
		348.3	0
		348.525	0
		348.75	0
		348.975	0
		349.2	0
		349.425	0
		349.65	0
		349.875	0
		350.1	0
		350.325	0
		350.55	0
		350.775	0
		351	0
		351.225	0
		351.45	0
		351.675	0
		351.9	0
		352.125	0
		352.35	0
		352.575	0
		352.8	0
		353.025	0
		353.25	0
		353.475	0
		353.7	0
		353.925	0
		354.15	0
		354.375	0
		354.6	0
		354.825	0
		355.05	0
		355.275	0
		355.5	0
		355.725	0
		355.95	0
		356.175	0
		356.4	0
		356.625	0
		356.85	0
		357.075	0
		357.3	0
		357.525	0
		357.75	0
		357.975	0
		358.2	0
		358.425	0
		358.65	0
		358.875	0
		359.1	0
		359.325	0
		359.55	0
		359.775	0
		360	0
		360.225	0
		360.45	0
		360.675	0
		360.9	0
		361.125	0
		361.35	0
		361.575	0
		361.8	0
		362.025	0
		362.25	0
		362.475	0
		362.7	0
		362.925	0
		363.15	0
		363.375	0
		363.6	0
		363.825	0
		364.05	0
		364.275	0
		364.5	0
		364.725	0
		364.95	0
		365.175	0
		365.4	0
		365.625	0
		365.85	0
		366.075	0
		366.3	0
		366.525	0
		366.75	0
		366.975	0
		367.2	0
		367.425	0
		367.65	0
		367.875	0
		368.1	0
		368.325	0
		368.55	0
		368.775	0
		369	0
		369.225	0
		369.45	0
		369.675	0
		369.9	0
		370.125	0
		370.35	0
		370.575	0
		370.8	0
		371.025	0
		371.25	0
		371.475	0
		371.7	0
		371.925	0
		372.15	0
		372.375	0
		372.6	0
		372.825	0
		373.05	0
		373.275	0
		373.5	0
		373.725	0
		373.95	0
		374.175	0
		374.4	0
		374.625	0
		374.85	0
		375.075	0
		375.3	0
		375.525	0
		375.75	0
		375.975	0
		376.2	0
		376.425	0
		376.65	0
		376.875	0
		377.1	0
		377.325	0
		377.55	0
		377.775	0
		378	0
		378.225	0
		378.45	0
		378.675	0
		378.9	0
		379.125	0
		379.35	0
		379.575	0
		379.8	0
		380.025	0
		380.25	0
		380.475	0
		380.7	0
		380.925	0
		381.15	0
		381.375	0
		381.6	0
		381.825	0
		382.05	0
		382.275	0
		382.5	0
		382.725	0
		382.95	0
		383.175	0
		383.4	0
		383.625	0
		383.85	0
		384.075	0
		384.3	0
		384.525	0
		384.75	0
		384.975	0
		385.2	0
		385.425	0
		385.65	0
		385.875	0
		386.1	0
		386.325	0
		386.55	0
		386.775	0
		387	0
		387.225	0
		387.45	0
		387.675	0
		387.9	0
		388.125	0
		388.35	0
		388.575	0
		388.8	0
		389.025	0
		389.25	0
		389.475	0
		389.7	0
		389.925	0
		390.15	0
		390.375	0
		390.6	0
		390.825	0
		391.05	0
		391.275	0
		391.5	0
		391.725	0
		391.95	0
		392.175	0
		392.4	0
		392.625	0
		392.85	0
		393.075	0
		393.3	0
		393.525	0
		393.75	4.24262e-09
		393.975	6.8309e-09
		394.2	1.08907e-08
		394.425	1.71937e-08
		394.65	2.68791e-08
		394.875	4.16099e-08
		395.1	6.3784e-08
		395.325	9.68192e-08
		395.55	1.45528e-07
		395.775	2.16603e-07
		396	3.19239e-07
		396.225	4.65911e-07
		396.45	6.73324e-07
		396.675	9.63562e-07
		396.9	1.36543e-06
		397.125	1.91599e-06
		397.35	2.66227e-06
		397.575	3.66306e-06
		397.8	4.99081e-06
		398.025	6.73337e-06
		398.25	8.99556e-06
		398.475	1.19003e-05
		398.7	1.55891e-05
		398.925	2.02218e-05
		399.15	2.59749e-05
		399.375	3.30385e-05
		399.6	4.16123e-05
		399.825	5.18988e-05
		400.05	6.40955e-05
		400.275	7.83848e-05
		400.5	9.49227e-05
		400.725	0.000113826
		400.95	0.000135161
		401.175	0.000158925
		401.4	0.000185041
		401.625	0.000213343
		401.85	0.000243569
		402.075	0.00027536
		402.3	0.000308257
		402.525	0.000341712
		402.75	0.000375096
		402.975	0.000407716
		403.2	0.000438842
		403.425	0.000467727
		403.65	0.000493642
		403.875	0.000515899
		404.1	0.00053389
		404.325	0.000547109
		404.55	0.000555175
		404.775	0.000557853
		405	0.000555066
		405.225	0.000546894
		405.45	0.000533576
		405.675	0.000515495
		405.9	0.000493158
		406.125	0.000467178
		406.35	0.00043824
		406.575	0.000407077
		406.8	0.000374435
		407.025	0.000341043
		407.25	0.000307593
		407.475	0.000274713
		407.7	0.000242949
		407.925	0.000212758
		408.15	0.000184497
		408.375	0.000158427
		408.6	0.000134711
		408.825	0.000113425
		409.05	9.45698e-05
		409.275	7.8078e-05
		409.5	6.38321e-05
		409.725	5.16754e-05
		409.95	4.14251e-05
		410.175	3.28834e-05
		410.4	2.58479e-05
		410.625	2.0119e-05
		410.85	1.55068e-05
		411.075	1.18352e-05
		411.3	8.94456e-06
		411.525	6.69388e-06
		411.75	4.96057e-06
		411.975	3.64015e-06
		412.2	2.6451e-06
		412.425	1.90326e-06
		412.65	1.35609e-06
		412.875	9.56785e-07
		413.1	6.68457e-07
		413.325	4.62453e-07
		413.55	3.16807e-07
		413.775	2.14911e-07
		414	1.44362e-07
		414.225	9.60252e-08
		414.45	6.32485e-08
		414.675	4.12525e-08
		414.9	2.6643e-08
		415.125	1.70393e-08
		415.35	1.07908e-08
		415.575	6.76692e-09
		415.8	4.20206e-09
		416.025	0
		416.25	0
		416.475	0
		416.7	0
		416.925	0
		417.15	0
		417.375	0
		417.6	0
		417.825	0
		418.05	0
		418.275	0
		418.5	0
		418.725	0
		418.95	0
		419.175	0
		419.4	0
		419.625	0
		419.85	0
		420.075	0
		420.3	0
		420.525	0
		420.75	0
		420.975	0
		421.2	0
		421.425	0
		421.65	0
		421.875	0
		422.1	0
		422.325	0
		422.55	0
		422.775	0
		423	0
		423.225	0
		423.45	0
		423.675	0
		423.9	0
		424.125	0
		424.35	0
		424.575	0
		424.8	0
		425.025	0
		425.25	0
		425.475	0
		425.7	0
		425.925	0
		426.15	0
		426.375	0
		426.6	0
		426.825	0
		427.05	0
		427.275	0
		427.5	0
		427.725	0
		427.95	0
		428.175	0
		428.4	0
		428.625	0
		428.85	0
		429.075	0
		429.3	0
		429.525	0
		429.75	0
		429.975	0
		430.2	0
		430.425	0
		430.65	0
		430.875	0
		431.1	0
		431.325	0
		431.55	0
		431.775	0
		432	0
		432.225	0
		432.45	0
		432.675	0
		432.9	0
		433.125	0
		433.35	0
		433.575	0
		433.8	0
		434.025	0
		434.25	0
		434.475	0
		434.7	0
		434.925	0
		435.15	0
		435.375	0
		435.6	0
		435.825	0
		436.05	0
		436.275	0
		436.5	0
		436.725	0
		436.95	0
		437.175	0
		437.4	0
		437.625	0
		437.85	0
		438.075	0
		438.3	0
		438.525	0
		438.75	0
		438.975	0
		439.2	0
		439.425	0
		439.65	0
		439.875	0
		440.1	0
		440.325	0
		440.55	0
		440.775	0
		441	0
		441.225	0
		441.45	0
		441.675	0
		441.9	0
		442.125	0
		442.35	0
		442.575	0
		442.8	0
		443.025	0
		443.25	0
		443.475	0
		443.7	0
		443.925	0
		444.15	0
		444.375	0
		444.6	0
		444.825	0
		445.05	0
		445.275	0
		445.5	0
		445.725	0
		445.95	0
		446.175	0
		446.4	0
		446.625	0
		446.85	0
		447.075	0
		447.3	0
		447.525	0
		447.75	0
		447.975	0
		448.2	0
		448.425	0
		448.65	0
		448.875	0
		449.1	0
		449.325	0
		449.55	0
		449.775	0
[truncated: 1 more rows]

## Sheet: Sheet1
Compilation of Detrital Zircon U-Th-Pb data
short	sample	zircon	zircon	zircon
citation	name	U-Pb age	age error	Th/U
Cristofolini et al., 2012	4	539.5	26.6	0.909091
	8	529.6	21.9	1.66667
	10	505.7	18.6	0.625
	15	549.4	33.5	0.769231
	16	503.9	25.9	0.384615
	18	544.6	40.9	0.833333
	20	474.3	34.3	0.105263
	23	519.9	18.3	0.454545
	24	515.6	9	1
	28	538.8	19.9	0.833333
	30	530.1	23.3	0.833333
	31	496.4	20.8	0.666667
	36	523.3	25.7	0.111111
	38	528	36.3	0.625
	39	476.4	43.1	0.172414
	42	535.4	53.1	0.384615
	45	511.1	16.2	0.666667
	47	539.4	29.8	0.5
	49	529.3	35.9	0.555556
	50	547.3	24.5	0.625
	51	541.3	55.4	0.714286
	52	495.7	52.8	0.769231
	53	490.9	16.4	0.454545
	65	515.8	15.2	1.25
	75	490.5	12.4	0.909091
	93	537.3	32.7	1
	94	549.6	28.8	2
	97	498.4	11.6	0.666667
	99	501.8	23.1	0.5
	100	536.6	20.4	0.37037
Capaldi et al., 2017	RAG01_1.FIN2	503.5	8.6	2.43309
	RAG01_10.FIN2	498	11	0.0167224
	RAG01_100.FIN2	448	5	1.53351
	RAG01_102.FIN2	33.5	1.1	0.746826
	RAG01_104.FIN2	313.9	6.1	0.175439
	RAG01_105.FIN2	266.8	3.9	0.793651
	RAG01_106.FIN2	276.1	2.5	0.890472
	RAG01_107.FIN2	283.6	3.7	0.611995
	RAG01_108.FIN2	292.5	6.6	0.999001
	RAG01_109.FIN2	26.75	0.96	1.26263
	RAG01_110.FIN2	517.8	6.3	0.727802
	RAG01_111.FIN2	277.2	2.3	0.814996
	RAG01_112.FIN2	482	15	0.111111
	RAG01_113.FIN2	259.7	2.5	1.07319
	RAG01_114.FIN2	462.8	8.1	0.543478
	RAG01_116.FIN2	518.1	4.8	0.581058
	RAG01_117.FIN2	492.9	8.3	0.664452
	RAG01_118.FIN2	473.7	4.8	1.15075
	RAG01_119.FIN2	271.9	4.5	0.859845
	RAG01_12.FIN2	480	19	0.60241
	RAG01_13.FIN2	276.5	3.7	1.1534
	RAG01_2.FIN2	522.5	4.1	0.613121
	RAG01_21.FIN2	275.9	2.8	1.40944
	RAG01_23.FIN2	290.6	3.4	0.613497
	RAG01_24.FIN2	488.9	4.5	0.194553
	RAG01_26.FIN2	510.8	7.4	0.837521
	RAG01_27.FIN2	511	12	6.61813
	RAG01_29.FIN2	477	8.3	1.30719
	RAG01_31.FIN2	545.9	3.7	0.636943
	RAG01_33.FIN2	276.7	2.9	0.960615
	RAG01_34.FIN2	491.8	5.7	0.325733
	RAG01_35.FIN2	275.5	3.5	1.98177
	RAG01_41.FIN2	277.4	2.5	1.00806
	RAG01_45.FIN2	489.7	4.4	0.169205
	RAG01_46.FIN2	368.2	3.9	0.680272
	RAG01_48.FIN2	267.1	3.6	0.769231
	RAG01_5.FIN2	280	2.4	0.925069
	RAG01_50.FIN2	413.4	4.9	0.714286
	RAG01_51.FIN2	36	1.5	0.598086
	RAG01_53.FIN2	517	11	0.0108696
	RAG01_55.FIN2	492.5	4.8	0.789266
	RAG01_56.FIN2	489.9	6.5	0.859107
	RAG01_58.FIN2	273.6	2.5	0.938967
	RAG01_6.FIN2	467.8	6.3	0.119048
	RAG01_61.FIN2	295.4	3.8	0.851789
	RAG01_62.FIN2	279.3	3.1	1.28866
	RAG01_67.FIN2	486	4.8	0.436681
	RAG01_68.FIN2	491	5	0.765697
	RAG01_69.FIN2	466.5	4.9	0.108108
	RAG01_7.FIN2	540.1	5.1	0.833333
	RAG01_75.FIN2	535.9	7.9	0.404858
	RAG01_78.FIN2	484.3	8.2	1.31926
	RAG01_8.FIN2	275.9	2.7	1.0101
	RAG01_80.FIN2	478.7	4.6	0.84317
	RAG01_82.FIN2	466.6	5.5	0.84317
	RAG01_84.FIN2	283.1	3.5	1.04932
	RAG01_88.FIN2	306.5	2.7	1.3089
	RAG01_89.FIN2	460	3.7	0.669792
	RAG01_9.FIN2	469.5	6.8	0.484731
	RAG01_92.FIN2	539.7	5.1	1.37174
	RAG01_93.FIN2	28.79	0.88	0.827815
	RAG01_94.FIN2	260.5	4	1.77148
	RAG01_95.FIN2	456	2.6	0.121212
	RAG01_96.FIN2	282.6	2.4	0.896298
	RAG01_99.FIN2	526	8	1.37457
	RBLA01_1.FIN2	247.7	6.6	0.413223
	RBLA01_10.FIN2	235.3	4.3	0.921659
	RBLA01_100.FIN2	326.7	6.5	0.166667
	RBLA01_101.FIN2	11.68	0.75	0.440529
	RBLA01_102.FIN2	294.1	9.6	0.625391
	RBLA01_103.FIN2	47.8	4.2	0.794913
	RBLA01_104.FIN2	16.17	0.93	1.11982
	RBLA01_105.FIN2	21.6	1.4	1.45985
	RBLA01_106.FIN2	259	11	1.13122
	RBLA01_107.FIN2	212.9	5.7	1.43062
	RBLA01_11.FIN2	469.1	8.3	0.986193
	RBLA01_113.FIN2	252.3	5.4	0.694444
	RBLA01_115.FIN2	298.6	7.8	0.271444
	RBLA01_116.FIN2	253.6	6	1.12994
	RBLA01_119.FIN2	251.9	5.1	0.977517
	RBLA01_120.FIN2	262.5	7.9	1.12486
	RBLA01_121.FIN2	15.9	1.3	1.15875
	RBLA01_122.FIN2	342.6	8.5	0.6035
	RBLA01_123.FIN2	139.3	5.3	0.613497
	RBLA01_125.FIN2	257	10	0.655308
	RBLA01_126.FIN2	248.7	7.5	1.03734
	RBLA01_127.FIN2	15.15	0.81	0.653168
	RBLA01_128.FIN2	241.3	5.4	0.740741
	RBLA01_129.FIN2	312.9	6.3	0.63857
	RBLA01_13.FIN2	313.2	6.1	0.594884
	RBLA01_130.FIN2	266.9	7.1	0.655738
	RBLA01_14.FIN2	296.9	4.7	0.617284
	RBLA01_15.FIN2	21.6	1.2	0.21692
	RBLA01_16.FIN2	245.5	4	0.986193
	RBLA01_17.FIN2	252.9	6.3	1.17647
	RBLA01_18.FIN2	285.8	4.7	0.550964
	RBLA01_19.FIN2	337	5	0.25974
	RBLA01_21.FIN2	16.5	1.1	0.841043
	RBLA01_22.FIN2	288.3	8.4	0.57241
	RBLA01_24.FIN2	291.2	3.6	0.759301
	RBLA01_25.FIN2	16.7	1.3	0.762195
	RBLA01_26.FIN2	252.8	5.3	0.579039
	RBLA01_28.FIN2	312.1	5.3	0.501505
	RBLA01_29.FIN2	327.6	9.4	0.403226
	RBLA01_3.FIN2	252	6.8	0.874126
	RBLA01_31.FIN2	288.8	6.3	0.81103
	RBLA01_32.FIN2	301	12	0.600962
	RBLA01_34.FIN2	240.9	3.7	1.09649
	RBLA01_35.FIN2	263.8	7.1	0.731529
	RBLA01_36.FIN2	252.9	7	0.809717
	RBLA01_38.FIN2	308.4	5.2	0.225225
	RBLA01_4.FIN2	304.5	5.4	0.629723
	RBLA01_40.FIN2	243.1	5.9	0.421763
	RBLA01_42.FIN2	299.3	5.8	0.380228
	RBLA01_45.FIN2	240.8	5.6	0.87108
	RBLA01_47.FIN2	258.5	3.6	0.773395
	RBLA01_48.FIN2	223.6	6.8	1.47275
	RBLA01_49.FIN2	16.16	0.94	0.729927
	RBLA01_50.FIN2	22.1	1.1	0.693963
	RBLA01_55.FIN2	453	13	0.0117647
	RBLA01_56.FIN2	21.82	0.87	0.802568
	RBLA01_57.FIN2	17.2	1.3	0.755858
	RBLA01_58.FIN2	283.9	4.4	1.08578
	RBLA01_59.FIN2	314	10	0.609756
	RBLA01_6.FIN2	285.7	6.5	0.793651
	RBLA01_6.FIN2	420.7	9.9	0.108696
	RBLA01_60.FIN2	250.5	4.7	1.09649
	RBLA01_61.FIN2	307	15	0.118483
	RBLA01_62.FIN2	277.7	9.6	0.46729
	RBLA01_63.FIN2	264	5.6	0.815661
	RBLA01_64.FIN2	244.9	5.8	1.55039
	RBLA01_65.FIN2	240.3	5.2	0.911577
	RBLA01_66.FIN2	332	11	0.747384
	RBLA01_67.FIN2	233.5	5.9	1.1274
	RBLA01_7.FIN2	252.8	4.7	1.26904
	RBLA01_70.FIN2	318.6	8.4	0.157978
	RBLA01_72.FIN2	261.5	9.1	0.869565
	RBLA01_73.FIN2	235	4.4	0.65445
	RBLA01_75.FIN2	317.9	4.6	0.718391
	RBLA01_76.FIN2	251	6.6	1.07066
	RBLA01_78.FIN2	246.8	5.4	0.754717
	RBLA01_79.FIN2	261.2	5.6	0.709723
	RBLA01_80.FIN2	226.9	7.1	0.400962
	RBLA01_82.FIN2	243.6	5.6	1.11359
	RBLA01_83.FIN2	302.7	7.8	0.647249
	RBLA01_85.FIN2	242.1	6	1.21803
	RBLA01_86.FIN2	20.6	1.6	2.01613
	RBLA01_87.FIN2	246.7	8.5	1.221
	RBLA01_88.FIN2	20.1	1.4	1.57978
	RBLA01_89.FIN2	259.9	6.1	1.17371
	RBLA01_9.FIN2	265.2	5.9	1.53374
	RBLA01_91.FIN2	13.8	1	0.445434
	RBLA01_93.FIN2	36.7	2.1	0.394322
	RBLA01_95.FIN2	222.7	8.2	1.14155
	RBLA01_98.FIN2	288.9	9.6	1.23916
	RBLA01_99.FIN2	245	7.8	0.823723
	RBMJ01_1.FIN2	499	13	0.0854701
	RBMJ01_101.FIN2	419.5	9.3	0.2079
	RBMJ01_102.FIN2	451.2	9.9	0.0609756
	RBMJ01_103.FIN2	402	16	0.00833333
	RBMJ01_105.FIN2	361	16	0.490196
	RBMJ01_106.FIN2	497	31	0.0934579
	RBMJ01_108.FIN2	341	9.2	0.546448
	RBMJ01_109.FIN2	533	15	0.00943396
	RBMJ01_11.FIN2	301.2	9	0.534188
	RBMJ01_110.FIN2	334	13	1.20482
	RBMJ01_113.FIN2	423	14	0.034965
	RBMJ01_116.FIN2	524	19	0.0396825
	RBMJ01_118.FIN2	429.6	9	0.259067
	RBMJ01_126.FIN2	329	12	0.818331
	RBMJ01_13.FIN2	9.33	0.55	0.43535
	RBMJ01_130.FIN2	550	19	0.259067
	RBMJ01_14.FIN2	486.5	9.1	0.841751
	RBMJ01_17.FIN2	458	12	0.730994
	RBMJ01_22.FIN2	366.4	6.8	1.30548
	RBMJ01_26.FIN2	531	11	0.120337
	RBMJ01_27.FIN2	513	10	0.86881
	RBMJ01_29.FIN2	492	13	0.0543478
	RBMJ01_30.FIN2	456	12	0.118765
	RBMJ01_31.FIN2	479	13	0.513347
	RBMJ01_32.FIN2	528	13	0.675219
	RBMJ01_34.FIN2	471	23	0.0193798
	RBMJ01_35.FIN2	288.1	5.3	0.87184
	RBMJ01_37.FIN2	235.9	7.3	0.643087
	RBMJ01_39.FIN2	499	32	0.0934579
	RBMJ01_4.FIN2	455	11	0.840336
	RBMJ01_48.FIN2	296	11	0.808407
	RBMJ01_49.FIN2	483.7	9.4	0.0918274
	RBMJ01_5.FIN2	326	11	0.931966
	RBMJ01_52.FIN2	447	14	0.660939
	RBMJ01_58.FIN2	304.6	6.7	0.95511
	RBMJ01_6.FIN2	493	16	0.0163934
	RBMJ01_61.FIN2	459	14	0.0552486
	RBMJ01_62.FIN2	540	47	0.0515464
	RBMJ01_63.FIN2	469	16	1.26743
	RBMJ01_69.FIN2	530	17	0.00961538
	RBMJ01_7.FIN2	39.3	1.4	0.749625
	RBMJ01_75.FIN2	424	16	0.0232558
	RBMJ01_79.FIN2	545	14	0.886525
	RBMJ01_8.FIN2	530	16	0.834028
	RBMJ01_82.FIN2	17.66	0.96	0.163399
	RBMJ01_84.FIN2	290.3	7.5	1.03093
	RBMJ01_89.FIN2	443	12	0.580046
	RBMJ01_93.FIN2	363.7	8.4	0.94518
	RBV01_10.FIN2	329.2	7.5	0.819672
	RBV01_100.FIN2	379	13	0.014771
	RBV01_102.FIN2	347.5	7.7	0.855432
	RBV01_103.FIN2	321.6	8.6	0.925926
	RBV01_104.FIN2	365.4	8.7	0.179533
	RBV01_106.FIN2	397	12	0.00725163
	RBV01_107.FIN2	417.9	8	0.0114943
	RBV01_109.FIN2	498.7	8.7	0.0150602
	RBV01_113.FIN2	360	10	1.22699
	RBV01_115.FIN2	340.8	9	0.84317
	RBV01_116.FIN2	440	13	0.015625
	RBV01_117.FIN2	501	14	0.011919
	RBV01_12.FIN2	43.9	1.4	0.735294
	RBV01_121.FIN2	7.63	0.29	0.909091
	RBV01_122.FIN2	536	15	0.012285
	RBV01_123.FIN2	329	11	0.857633
	RBV01_124.FIN2	9.07	0.62	0.529101
	RBV01_127.FIN2	306.6	8.8	0.504541
	RBV01_128.FIN2	513.7	8.9	0.0475059
	RBV01_129.FIN2	8.62	0.64	1.00806
	RBV01_130.FIN2	529.5	7.9	0.197628
	RBV01_14.FIN2	7.84	0.47	0.332226
	RBV01_16.FIN2	505	13	0.73692
	RBV01_17.FIN2	499.4	9.2	0.149477
	RBV01_20.FIN2	504	26	0.08
	RBV01_21.FIN2	506.5	9.4	0.00794913
	RBV01_22.FIN2	429	14	0.028169
	RBV01_23.FIN2	540	18	0.0361011
	RBV01_24.FIN2	492	16	0.726216
	RBV01_25.FIN2	473	10	0.0531915
	RBV01_26.FIN2	445.5	9.2	0.0251889
	RBV01_27.FIN2	424.7	7.6	0.623441
	RBV01_3.FIN2	418	12	0.008
	RBV01_30.FIN2	304.6	6.9	0.514668
	RBV01_31.FIN2	528	13	0.00398406
	RBV01_33.FIN2	536	22	0.0245098
	RBV01_34.FIN2	486	26	0.025641
	RBV01_38.FIN2	487.7	9.2	0.0793651
	RBV01_4.FIN2	249.1	6.4	0.643501
	RBV01_40.FIN2	538	6.8	0.483325
	RBV01_41.FIN2	523	18	0.486855
	RBV01_42.FIN2	414	14	0.0184843
	RBV01_43.FIN2	406	23	0.169492
	RBV01_44.FIN2	482	11	0.180832
	RBV01_45.FIN2	297.8	6.6	0.313676
	RBV01_46.FIN2	398	11	0.110865
	RBV01_48.FIN2	506	14	2.05381
	RBV01_49.FIN2	499	27	0.0125
	RBV01_5.FIN2	344.4	7	0.998004
	RBV01_51.FIN2	506	19	0.0232019
	RBV01_54.FIN2	482	11	0.0222717
	RBV01_55.FIN2	311	6.9	0.622278
	RBV01_59.FIN2	487	20	0.378788
	RBV01_6.FIN2	20.8	1.4	0.271739
	RBV01_60.FIN2	10.71	0.45	0.205339
	RBV01_61.FIN2	534	14	0.0196078
	RBV01_62.FIN2	457	21	0.274725
	RBV01_63.FIN2	353	13	0.483092
	RBV01_64.FIN2	495	11	0.864304
	RBV01_65.FIN2	471	19	0.0217865
	RBV01_66.FIN2	426	14	0.0212766
	RBV01_68.FIN2	482	13	0.120773
	RBV01_69.FIN2	514	14	0.00598802
	RBV01_71.FIN2	348.2	8.2	1.06045
	RBV01_73.FIN2	502	24	0.0294118
	RBV01_75.FIN2	428	10	0.33557
	RBV01_76.FIN2	72	2.1	0.540541
	RBV01_78.FIN2	357.4	8.1	1.20773
	RBV01_79.FIN2	441	7.8	0.52356
	RBV01_85.FIN2	325	18	1.02669
	RBV01_87.FIN2	496	16	0.189753
	RBV01_9.FIN2	522	16	0.486855
	RBV01_93.FIN2	427	21	0.0188679
	RBV01_95.FIN2	460.1	9	0.0783699
	RBV01_96.FIN2	353.8	9.7	0.548847
	RBV01_98.FIN2	476.6	9	0.0657895
	RBV01_99.FIN2	20.8	1.3	0.444444
	RJAC_1.FIN2	23.4	1.1	0.693001
	RJAC_10.FIN2	67.8	1.7	0.763359
	RJAC_100.FIN2	15.64	0.9	1.35135
	RJAC_102.FIN2	274.2	5.8	0.912409
	RJAC_104.FIN2	29.2	1.2	0.820345
	RJAC_105.FIN2	405.7	7.2	0.238095
	RJAC_11.FIN2	325	9.2	0.575043
	RJAC_111.FIN2	350.9	7.7	0.321958
	RJAC_112.FIN2	310.3	8.2	0.718907
	RJAC_113.FIN2	40.2	2.1	0.83682
	RJAC_115.FIN2	39.8	3	1.1976
	RJAC_119.FIN2	14.19	0.89	0.645578
	RJAC_122.FIN2	14	1	0.409836
	RJAC_124.FIN2	25.1	1.3	1.23153
	RJAC_13.FIN2	259	15	0.381679
	RJAC_130.FIN2	24.2	1.2	0.876424
	RJAC_15.FIN2	308.5	6.8	0.648929
	RJAC_17.FIN2	494.6	9.2	0.100604
	RJAC_19.FIN2	44.4	1.8	0.745712
	RJAC_20.FIN2	14.01	0.62	0.501002
	RJAC_21.FIN2	20.11	0.66	0.739645
	RJAC_22.FIN2	26.5	1.1	0.877963
	RJAC_23.FIN2	339	11	0.561798
	RJAC_24.FIN2	15.41	0.83	0.43802
	RJAC_25.FIN2	24.7	1	0.595238
	RJAC_27.FIN2	19.3	1.3	1.07066
	RJAC_3.FIN2	19.1	1	0.65445
	RJAC_30.FIN2	255.6	8.6	0.458716
	RJAC_33.FIN2	286	5	1.18765
	RJAC_34.FIN2	463.2	9.1	0.0117647
	RJAC_38.FIN2	70.7	2.3	0.680735
	RJAC_4.FIN2	360	14	0.429185
	RJAC_40.FIN2	307.3	6.7	0.37037
	RJAC_41.FIN2	39.5	2	0.676133
	RJAC_42.FIN2	25.8	1.2	0.358038
	RJAC_43.FIN2	37.4	1.7	0.593472
	RJAC_44.FIN2	25.6	1	0.706714
	RJAC_45.FIN2	8.86	0.77	0.505561
	RJAC_47.FIN2	23.92	0.69	0.425532
	RJAC_48.FIN2	26.22	0.72	0.46729
	RJAC_53.FIN2	43	3	0.625
	RJAC_55.FIN2	35.4	1.4	0.240964
	RJAC_56.FIN2	24.69	0.81	0.316456
	RJAC_57.FIN2	43.9	2.9	0.257732
	RJAC_58.FIN2	39.6	1.5	0.535045
	RJAC_59.FIN2	247	11	0.322581
	RJAC_6.FIN2	285.8	8.9	0.918274
	RJAC_61.FIN2	294.8	6	1.08108
	RJAC_62.FIN2	388.2	8.4	0.443853
	RJAC_63.FIN2	515	11	0.335683
	RJAC_66.FIN2	340	10	0.740741
	RJAC_67.FIN2	13.26	0.46	0.421941
	RJAC_68.FIN2	393	12	0.337838
	RJAC_7.FIN2	259.4	7.4	1.01523
	RJAC_71.FIN2	282.4	7.9	0.684932
	RJAC_72.FIN2	15.89	0.72	0.27933
	RJAC_73.FIN2	11.41	0.51	0.465116
	RJAC_74.FIN2	298.1	9.7	0.557103
	RJAC_81.FIN2	26.8	1.1	0.714796
	RJAC_83.FIN2	296.7	4.9	0.64433
	RJAC_84.FIN2	14.94	0.88	0.378788
	RJAC_85.FIN2	36.5	1.7	0.253165
	RJAC_86.FIN2	410.5	6.5	0.531632
	RJAC_87.FIN2	15.2	1	0.69541
	RJAC_88.FIN2	40.5	2.8	0.897666
	RJAC_89.FIN2	27.1	1.5	0.63857
	RJAC_9.FIN2	331.9	7.4	0.892857
	RJAC_91.FIN2	37	1.4	0.646831
	RJAC_93.FIN2	38.9	3.4	1.34228
	RJAC_94.FIN2	7.95	0.64	0.641026
	RJAC_95.FIN2	466.9	5.7	0.884956
	RJAC_97.FIN2	9.02	0.77	0.680272
	RJAC_98.FIN2	294.2	6.9	0.314465
	RLC01_100.FIN2	17	1.6	1.48368
	RLC01_122.FIN2	13.46	0.81	0.348432
	RLC01_65.FIN2	15.76	0.95	0.94162
	RLT01_10.FIN2	485.8	8.9	0.290698
	RLT01_100.FIN2	263.9	4	0.416667
	RLT01_105.FIN2	290.3	5.1	0.57971
	RLT01_106.FIN2	462	11	0.0308642
	RLT01_109.FIN2	291.8	4.6	0.453721
	RLT01_11.FIN2	327.5	5.6	0.31746
	RLT01_110.FIN2	264.5	3.9	0.837521
	RLT01_111.FIN2	325.8	4.9	0.271739
	RLT01_113.FIN2	330.9	5.8	0.185529
	RLT01_116.FIN2	336.1	6	0.654022
	RLT01_117.FIN2	340.1	5.2	0.141044
	RLT01_118.FIN2	242.4	9.5	0.724638
	RLT01_120.FIN2	268.8	4.6	0.562746
	RLT01_121.FIN2	438.2	8.2	1.18624
	RLT01_122.FIN2	470	7.2	0.666667
	RLT01_123.FIN2	477	10	0.0169492
	RLT01_125.FIN2	281	12	0.664011
	RLT01_126.FIN2	326.9	3.8	0.357143
	RLT01_127.FIN2	367	7	0.786164
	RLT01_129.FIN2	351	11	0.442087
	RLT01_130.FIN2	288.5	4.3	0.729927
	RLT01_14.FIN2	306.3	5.5	0.320513
	RLT01_2.FIN2	509	10	0.719424
	RLT01_25.FIN2	270	6.7	1.24224
	RLT01_29.FIN2	46.7	1	1.24688
	RLT01_3.FIN2	464	19	0.170068
	RLT01_31.FIN2	483	11	0.518135
	RLT01_36.FIN2	529.1	9.5	0.0384615
	RLT01_39.FIN2	299.9	6.7	0.49505
	RLT01_4.FIN2	276	4.4	0.809717
	RLT01_42.FIN2	56.4	1.2	1.04822
	RLT01_43.FIN2	336.5	5.4	0.506842
	RLT01_44.FIN2	509.5	7.2	0.621118
	RLT01_45.FIN2	459	12	0.265957
	RLT01_46.FIN2	33.6	1.5	0.774593
	RLT01_50.FIN2	260.7	6.6	0.228833
	RLT01_52.FIN2	412.4	7	0.666667
	RLT01_53.FIN2	317.5	9.9	0.705716
	RLT01_55.FIN2	264.9	4.8	0.505051
	RLT01_59.FIN2	24.62	0.85	0.93985
	RLT01_6.FIN2	276.2	4.4	0.554017
	RLT01_60.FIN2	17.39	0.66	0.449035
	RLT01_61.FIN2	337	16	0.419639
	RLT01_62.FIN2	291.5	4	0.564016
	RLT01_64.FIN2	267.9	3.3	0.735294
	RLT01_65.FIN2	376.6	9.9	0.352113
	RLT01_66.FIN2	269.5	4.1	0.469484
	RLT01_72.FIN2	54.5	1.8	1.41443
	RLT01_74.FIN2	389.3	9.4	0.129534
	RLT01_77.FIN2	301	11	0.770416
	RLT01_79.FIN2	295	11	0.726216
	RLT01_8.FIN2	493	11	0.194553
	RLT01_84.FIN2	477	11	0.0324675
	RLT01_85.FIN2	278.6	8	0.67981
	RLT01_86.FIN2	476.7	9.4	0.63012
	RLT01_89.FIN2	546.6	9	0.0387597
	RLT01_9.FIN2	36.17	0.71	0.881834
	RLT01_90.FIN2	478	6.9	0.898473
	RLT01_93.FIN2	390.7	8.2	0.635324
	RLT01_96.FIN2	498.2	5.6	0.442478
	RLT01_98.FIN2	533.2	9.3	0.910747
	RMDZ03_1.FIN2	143.6	3.1	0.744048
	RMDZ03_1.FIN2	178.3	6	0.844595
	RMDZ03_10.FIN2	169.1	3.8	0.807103
	RMDZ03_101.FIN2	160	5.3	0.681663
	RMDZ03_103.FIN2	174.1	8.5	0.601685
	RMDZ03_106.FIN2	209	7.2	0.879507
	RMDZ03_109.FIN2	21.5	1.1	0.802568
	RMDZ03_111.FIN2	416.9	9.1	0.540541
	RMDZ03_114.FIN2	314.3	7.1	0.561167
	RMDZ03_117.FIN2	166.6	5.5	0.784929
	RMDZ03_118.FIN2	171.2	5.5	0.807754
	RMDZ03_119.FIN2	87.6	2.7	0.830565
	RMDZ03_121.FIN2	178.8	5.3	0.76864
	RMDZ03_122.FIN2	18.94	0.73	0.648088
	RMDZ03_123.FIN2	315.9	5.8	0.542594
	RMDZ03_125.FIN2	354	9.2	0.28169
	RMDZ03_129.FIN2	140.7	3.8	0.825083
	RMDZ03_13.FIN2	304.6	5.5	0.598802
	RMDZ03_14.FIN2	7.18	0.26	0.985222
	RMDZ03_15.FIN2	143.6	4.4	0.884173
	RMDZ03_15.FIN2	288	10	0.653595
	RMDZ03_18.FIN2	285.7	8.6	1.09051
	RMDZ03_19.FIN2	357	8.6	0.254453
	RMDZ03_22.FIN2	299.6	5.7	0.611995
	RMDZ03_22.FIN2	315	10	0.429369
	RMDZ03_23.FIN2	158.7	3.8	1.21507
	RMDZ03_23.FIN2	537	29	0.207039
	RMDZ03_25.FIN2	315	9.5	0.874126
	RMDZ03_27.FIN2	62.8	4.3	0.497018
	RMDZ03_28.FIN2	281.3	7	0.702247
	RMDZ03_28.FIN2	488	32	0.015625
	RMDZ03_29.FIN2	307.3	3.7	0.74129
	RMDZ03_3.FIN2	144.8	5.1	0.816993
	RMDZ03_30.FIN2	172.3	5.1	1.16009
	RMDZ03_31.FIN2	95.6	4.6	0.635324
	RMDZ03_32.FIN2	168.7	3.8	0.746826
	RMDZ03_33.FIN2	9.52	0.66	24.4499
	RMDZ03_34.FIN2	294.6	6.2	0.982318
	RMDZ03_36.FIN2	20.8	1.6	1.13507
	RMDZ03_36.FIN2	365.7	8.7	0.364166
	RMDZ03_37.FIN2	151	7.6	0.680735
	RMDZ03_37.FIN2	160.6	4.4	0.982318
	RMDZ03_38.FIN2	164.1	5.7	1.11607
	RMDZ03_38.FIN2	528	35	0.0387597
	RMDZ03_4.FIN2	163.2	5.7	0.852515
	RMDZ03_42.FIN2	19.7	1.4	0.8285
	RMDZ03_42.FIN2	160	10	0.8285
	RMDZ03_44.FIN2	377.7	7.9	0.422833
	RMDZ03_45.FIN2	157.3	6.6	0.899281
	RMDZ03_45.FIN2	162.1	3.8	1.10132
	RMDZ03_47.FIN2	20.41	0.97	0.5
	RMDZ03_48.FIN2	325.3	5.6	0.701262
	RMDZ03_49.FIN2	20.8	1.2	0.736377
	RMDZ03_5.FIN2	163	4.6	0.87108
	RMDZ03_5.FIN2	167.8	4.6	0.832639
	RMDZ03_50.FIN2	179.9	7.3	0.929368
	RMDZ03_52.FIN2	34.8	1.5	0.807754
	RMDZ03_52.FIN2	292.3	6.9	0.623053
	RMDZ03_53.FIN2	162.2	7.2	0.563698
	RMDZ03_54.FIN2	146.3	8.2	0.548847
	RMDZ03_54.FIN2	185.3	6.8	0.797448
	RMDZ03_56.FIN2	35.1	1.7	0.953289
	RMDZ03_56.FIN2	201.5	5.9	0.76746
	RMDZ03_57.FIN2	307.4	5.4	0.660502
	RMDZ03_57.FIN2	514	13	0.291545
	RMDZ03_58.FIN2	153.1	6.2	0.524109
	RMDZ03_6.FIN2	271.7	9	0.612745
	RMDZ03_60.FIN2	169.7	4.5	0.895255
	RMDZ03_61.FIN2	159.8	5.6	0.662691
	RMDZ03_61.FIN2	189.3	8.1	1.5748
	RMDZ03_62.FIN2	296.7	5.7	0.992063
	RMDZ03_63.FIN2	19.3	1.2	1.00503
	RMDZ03_65.FIN2	159.6	4.2	1.04167
	RMDZ03_67.FIN2	159.4	6.3	0.625782
	RMDZ03_68.FIN2	168.7	4.4	0.608273
	RMDZ03_68.FIN2	510	12	0.0606061
	RMDZ03_69.FIN2	279	13	0.421941
	RMDZ03_7.FIN2	179.2	5.4	0.914913
	RMDZ03_70.FIN2	313.7	6.3	0.532765
	RMDZ03_72.FIN2	84.9	4.4	1.05042
	RMDZ03_72.FIN2	170.7	7.8	0.74239
	RMDZ03_73.FIN2	22.2	1.3	0.929368
	RMDZ03_73.FIN2	160.4	4.3	0.655738
	RMDZ03_74.FIN2	171.6	4.8	1.00604
	RMDZ03_74.FIN2	197	13	0.530786
	RMDZ03_75.FIN2	305.6	7.9	0.606061
	RMDZ03_79.FIN2	22.7	1.1	0.849618
	RMDZ03_8.FIN2	156.2	5.3	1.16959
	RMDZ03_83.FIN2	342.3	5.1	0.5
	RMDZ03_84.FIN2	161	15	0.649351
	RMDZ03_85.FIN2	10.04	0.69	0.373134
	RMDZ03_89.FIN2	300.2	8	0.414079
	RMDZ03_91.FIN2	13.64	0.65	0.295858
	RMDZ03_94.FIN2	330	15	0.518135
	RMDZ03_96.FIN2	186.6	5.4	0.814996
	RMDZ04_10.FIN2	285.8	5.7	0.702247
	RMDZ04_101.FIN2	449	29	0.330033
	RMDZ04_104.FIN2	232.2	9	0.744602
	RMDZ04_105.FIN2	249	12	0.654879
	RMDZ04_107.FIN2	233.4	5.5	0.626174
	RMDZ04_108.FIN2	20.33	0.92	0.854701
	RMDZ04_109.FIN2	254	5.6	0.794281
	RMDZ04_11.FIN2	239.3	5	0.671592
	RMDZ04_11.FIN2	239.4	5.8	0.484262
	RMDZ04_110.FIN2	304.7	5.7	0.649351
	RMDZ04_111.FIN2	291.9	6.9	0.623053
	RMDZ04_113.FIN2	244.9	7.6	0.483092
	RMDZ04_115.FIN2	304.1	7.3	0.63012
	RMDZ04_118.FIN2	222.3	6.4	0.430849
	RMDZ04_119.FIN2	6.69	0.44	0.749625
	RMDZ04_12.FIN2	50.7	1.8	0.647249
	RMDZ04_121.FIN2	231.3	7	0.522466
	RMDZ04_123.FIN2	315	11	0.74239
	RMDZ04_124.FIN2	268.7	9	0.769231
	RMDZ04_126.FIN2	271.9	8.9	0.833333
	RMDZ04_127.FIN2	10.53	0.65	0.547046
	RMDZ04_16.FIN2	483	10	0.140252
	RMDZ04_16.FIN2	498	21	0.0273973
	RMDZ04_18.FIN2	238.2	7.4	0.674309
	RMDZ04_18.FIN2	247.1	4.6	0.37594
	RMDZ04_19.FIN2	9.43	0.87	0.422654
	RMDZ04_2.FIN2	200.8	5.1	0.75815
	RMDZ04_2.FIN2	289.9	7.7	0.605327
	RMDZ04_20.FIN2	268.5	7.1	0.953289
	RMDZ04_21.FIN2	250.8	8.2	1.37174
	RMDZ04_21.FIN2	276.4	5.4	0.788022
	RMDZ04_22.FIN2	218.4	4.7	0.524384
	RMDZ04_22.FIN2	266.2	6.9	0.581734
	RMDZ04_23.FIN2	255	10	0.218341
	RMDZ04_24.FIN2	260.6	8.4	0.918274
	RMDZ04_24.FIN2	338	8.7	0.712758
	RMDZ04_26.FIN2	11.32	0.79	0.768049
	RMDZ04_26.FIN2	253.7	6.1	0.411523
	RMDZ04_27.FIN2	253	6.4	0.70373
	RMDZ04_28.FIN2	179.8	6.2	0.757576
	RMDZ04_28.FIN2	513.6	6.9	0.0298507
	RMDZ04_29.FIN2	236.5	8.4	0.90009
	RMDZ04_3.FIN2	228.3	8.3	0.834725
	RMDZ04_3.FIN2	247.7	6.6	0.874891
	RMDZ04_30.FIN2	46.5	3.6	0.664894
	RMDZ04_31.FIN2	247.4	8.7	0.763359
	RMDZ04_31.FIN2	249.8	4.1	0.746826
	RMDZ04_33.FIN2	256.6	3.9	0.633312
	RMDZ04_34.FIN2	257.8	5.3	0.696864
	RMDZ04_35.FIN2	236.9	6.8	0.683527
	RMDZ04_37.FIN2	253.1	6.3	0.819672
	RMDZ04_38.FIN2	265.8	5.1	0.393856
	RMDZ04_39.FIN2	250.5	4	0.435161
	RMDZ04_4.FIN2	256.5	8.3	0.615764
	RMDZ04_4.FIN2	461.7	7.1	0.174825
	RMDZ04_40.FIN2	227.6	5.2	0.555864
	RMDZ04_44.FIN2	155.2	4.7	0.472367
	RMDZ04_46.FIN2	293.2	6.7	0.712758
	RMDZ04_47.FIN2	234.3	7.5	0.684932
	RMDZ04_47.FIN2	269.7	9	0.714796
	RMDZ04_48.FIN2	255.4	4.1	1.12233
	RMDZ04_49.FIN2	148.4	4.3	1.08814
	RMDZ04_5.FIN2	9.71	0.61	0.0877193
	RMDZ04_50.FIN2	232.3	5.8	0.519481
	RMDZ04_51.FIN2	240.5	3.5	0.642261
	RMDZ04_53.FIN2	310	12	0.481928
	RMDZ04_53.FIN2	325.2	4.8	0.529101
	RMDZ04_55.FIN2	280.2	5.8	0.4329
	RMDZ04_55.FIN2	444	11	0.465116
	RMDZ04_56.FIN2	442	12	0.0290698
	RMDZ04_57.FIN2	253	6.2	0.526316
	RMDZ04_58.FIN2	269.3	9.1	0.42735
	RMDZ04_6.FIN2	265.5	6.3	0.611621
	RMDZ04_6.FIN2	422	20	0.724113
	RMDZ04_60.FIN2	208	4.3	0.493583
	RMDZ04_62.FIN2	216.2	7	0.793021
	RMDZ04_63.FIN2	292.2	8.5	0.717875
	RMDZ04_65.FIN2	298.6	9.6	0.856164
	RMDZ04_7.FIN2	245.7	6.6	0.613497
	RMDZ04_71.FIN2	277.2	3.8	0.40833
	RMDZ04_73.FIN2	311.2	8.5	1.04822
	RMDZ04_74.FIN2	243.1	9.3	0.582751
	RMDZ04_75.FIN2	256.6	7.8	0.622278
	RMDZ04_76.FIN2	307.5	6.7	0.135135
	RMDZ04_79.FIN2	493	20	0.0181818
	RMDZ04_8.FIN2	283.4	6.5	1.56986
	RMDZ04_82.FIN2	471	15	0.178253
	RMDZ04_9.FIN2	246.2	5.5	0.76864
	RMDZ04_90.FIN2	254	4.8	0.444444
	RMDZ04_92.FIN2	240	15	0.485437
	RMDZ04_95.FIN2	69.2	2.4	0.86881
	RMDZ04_97.FIN2	369	14	0.736377
	RMDZ04_98.FIN2	109.8	4.7	0.947867
	RMDZ04_99.FIN2	281.6	5.8	0.469925
	RSJ02_1.FIN2	18.3	2.9	0.630517
	RSJ02_10.FIN2	430.6	7.2	0.646831
	RSJ02_100.FIN2	13.57	0.87	0.74239
	RSJ02_102.FIN2	270.5	3.9	0.540541
	RSJ02_103.FIN2	270.4	5.5	0.640205
	RSJ02_105.FIN2	507.4	6.5	0.268312
	RSJ02_106.FIN2	495	10	0.0217391
	RSJ02_108.FIN2	450	11	0.0196078
	RSJ02_109.FIN2	14.8	1.3	0.729927
	RSJ02_11.FIN2	520.9	8.6	0.121951
	RSJ02_110.FIN2	268.5	9.4	0.94697
	RSJ02_111.FIN2	409.5	5.7	0.471254
	RSJ02_112.FIN2	34.3	1.7	0.588235
	RSJ02_116.FIN2	449.9	8.6	0.344828
	RSJ02_12.FIN2	8.7	1.4	0.3367
	RSJ02_122.FIN2	229.6	4.8	0.892857
	RSJ02_123.FIN2	264.1	3.6	0.838926
	RSJ02_124.FIN2	476.4	8.8	0.0224215
	RSJ02_129.FIN2	500	9.6	0.928505
	RSJ02_13.FIN2	244.5	6.2	1.0101
	RSJ02_15.FIN2	509	18	0.164745
	RSJ02_16.FIN2	8.8	1.3	0.444444
	RSJ02_17.FIN2	262.2	4.1	0.818331
	RSJ02_18.FIN2	233.6	5.2	0.21645
	RSJ02_2.FIN2	254.5	3.9	0.698812
	RSJ02_23.FIN2	23.2	1.7	0.202429
	RSJ02_24.FIN2	14.3	1.4	0.49776
	RSJ02_29.FIN2	6.92	0.58	0.447227
	RSJ02_3.FIN2	256.1	3.8	0.940734
	RSJ02_30.FIN2	512	16	0.659196
	RSJ02_31.FIN2	53.2	1.7	1.25786
	RSJ02_32.FIN2	10.63	0.6	0.190476
	RSJ02_34.FIN2	7.7	1.4	0.634921
	RSJ02_36.FIN2	268.2	6.2	1.11359
	RSJ02_36.FIN2	535.5	7.9	0.143885
	RSJ02_38.FIN2	238.5	6.9	0.628536
	RSJ02_38.FIN2	457	22	0.429185
	RSJ02_39.FIN2	547.6	7.3	0.369004
	RSJ02_4.FIN2	252.8	5.3	0.307692
	RSJ02_40.FIN2	8.21	0.55	0.403226
	RSJ02_41.FIN2	10.43	0.47	0.581395
	RSJ02_41.FIN2	34.1	2	0.341297
	RSJ02_42.FIN2	266.9	3.9	0.618812
	RSJ02_43.FIN2	8.7	1.2	0.806452
	RSJ02_46.FIN2	8.85	0.44	0.821018
	RSJ02_46.FIN2	549	13	0.241546
	RSJ02_47.FIN2	29.7	1.6	0.874126
	RSJ02_48.FIN2	250.5	4.5	0.627746
	RSJ02_49.FIN2	518	18	0.651466
	RSJ02_5.FIN2	29.9	2	0.943396
	RSJ02_54.FIN2	22.9	1.3	1.16686
	RSJ02_56.FIN2	541.3	7.8	0.425351
	RSJ02_57.FIN2	16.5	1.5	0.722543
	RSJ02_58.FIN2	243.8	5.1	1.20627
	RSJ02_59.FIN2	277.6	6.9	0.3663
	RSJ02_59.FIN2	323.4	4.1	0.582072
	RSJ02_6.FIN2	8.2	0.92	0.546448
	RSJ02_6.FIN2	11.87	0.48	0.575043
	RSJ02_63.FIN2	275.4	4.7	0.74239
	RSJ02_64.FIN2	248.8	4.4	0.694444
	RSJ02_64.FIN2	501.9	8.5	0.976562
	RSJ02_65.FIN2	215.9	5.6	2.0496
	RSJ02_66.FIN2	289.4	6.1	0.988142
	RSJ02_69.FIN2	431	15	0.0218341
	RSJ02_69.FIN2	548	15	0.0949668
	RSJ02_70.FIN2	303.5	8.9	0.236407
	RSJ02_70.FIN2	370.9	8.6	0.044843
	RSJ02_71.FIN2	15.58	0.62	0.925069
	RSJ02_72.FIN2	271.1	6.2	0.546448
	RSJ02_73.FIN2	23.9	1	0.800641
	RSJ02_79.FIN2	22.6	1.2	1.5748
	RSJ02_82.FIN2	40.6	1.2	0.742942
	RSJ02_83.FIN2	22.5	2.1	0.605327
	RSJ02_86.FIN2	8.7	1.7	0.642261
	RSJ02_88.FIN2	60.9	2.7	0.651466
	RSJ02_9.FIN2	469.2	5.4	0.354108
	RSJ02_93.FIN2	252.7	8.9	0.618812
	RSJ02_94.FIN2	465.6	6.6	0.665336
	RSJ02_96.FIN2	288.3	5.9	0.84317
	RSJ02_98.FIN2	452	20	0.204499
	RSJN01_104	266.9	3.2	0.948767
	RSJN01_105	29.61	0.72	1.24688
	RSJN01_11	504.7	4.9	0.783085
	RSJN01_110	486	14	0.694444
	RSJN01_111	258	3.1	1.30039
	RSJN01_114	241.1	2.6	0.695894
	RSJN01_115	268	3.5	1.16564
	RSJN01_119	543	12	0.703235
	RSJN01_12	317.9	4.5	1.05485
	RSJN01_120	14.9	0.36	0.230415
	RSJN01_13	277.5	7.5	0.746269
	RSJN01_14.FIN2	12.27	0.93	0.90009
	RSJN01_15.FIN2	21.4	1.4	0.925069
	RSJN01_17	245.8	3.6	0.972763
	RSJN01_19	538	6.6	0.735835
	RSJN01_2	545.9	7.5	0.0128205
	RSJN01_20	473.1	6.5	0.250627
	RSJN01_20.FIN2	254.7	4.5	0.374532
	RSJN01_21.FIN2	217.1	2.8	0.512295
	RSJN01_23	239.4	4.2	1.30719
	RSJN01_24	289.3	3.1	1.05042
	RSJN01_26.FIN2	526.5	5.5	0.587889
	RSJN01_27	289.8	3	0.559284
	RSJN01_29	260.5	3.7	1.32275
	RSJN01_29.FIN2	251.2	3.5	0.700771
	RSJN01_3.FIN2	15.52	0.93	0.859845
	RSJN01_30	231.4	3.4	1.2982
	RSJN01_30.FIN2	240.9	2.8	0.794913
	RSJN01_31.FIN2	289.3	6.1	0.698324
	RSJN01_32	268.8	2	0.866551
	RSJN01_33.FIN2	456	12	0.0181818
	RSJN01_34.FIN2	97.1	2.3	0.777001
	RSJN01_35	480	18	0.561798
	RSJN01_36	226.7	3.1	1.64745
	RSJN01_36.FIN2	239.7	4.7	0.723589
	RSJN01_37.FIN2	327	3.4	0.575705
	RSJN01_38.FIN2	272.6	4	0.719424
	RSJN01_40.FIN2	38	2.2	0.39557
	RSJN01_42	283.4	3.6	1.34935
	RSJN01_42.FIN2	467.1	5.8	0.078125
	RSJN01_43	14.2	0.44	0.3125
	RSJN01_43.FIN2	14.39	0.64	0.121951
	RSJN01_44	244.2	4	1.38504
	RSJN01_44.FIN2	298.3	3.3	0.807754
	RSJN01_45	542.9	5	0.657895
	RSJN01_45.FIN2	302.5	4.7	0.793651
	RSJN01_48.FIN2	354.8	5	0.724638
	RSJN01_49.FIN2	269	3.1	0.764526
	RSJN01_5.FIN2	262.5	8.3	0.714796
	RSJN01_50	500.6	5.8	0.273224
	RSJN01_50.FIN2	276.2	4.3	0.568828
	RSJN01_51.FIN2	529.8	7.5	1.0929
	RSJN01_52	15.01	0.58	0.210084
	RSJN01_52.FIN2	525	16	1.62602
	RSJN01_53	532.2	6.4	1.13122
	RSJN01_53.FIN2	248.8	4.2	1.07991
	RSJN01_54.FIN2	260.4	2.9	1.03627
	RSJN01_55.FIN2	124.3	2.6	0.630915
	RSJN01_56.FIN2	301	5.5	0.835422
	RSJN01_57.FIN2	263.4	4.6	0.705219
	RSJN01_59.FIN2	285.6	4.2	0.632911
	RSJN01_6.FIN2	286.1	6.1	0.914077
	RSJN01_62	294.9	4.9	0.423191
	RSJN01_65	14.84	0.47	0.243902
	RSJN01_68	411.2	3.8	0.826446
	RSJN01_69	19.64	0.7	1.28205
	RSJN01_7	13.89	0.58	0.999001
	RSJN01_7.FIN2	443.2	6	0.495295
	RSJN01_70	443.7	3.2	0.235849
	RSJN01_71	22.8	0.69	1.37552
	RSJN01_73	286.8	3.7	1.36799
	RSJN01_74	513.6	9.4	0.0854701
	RSJN01_75	279	2.9	1.10011
	RSJN01_76	230.5	6.3	1.55836
	RSJN01_77	227.9	4.2	1.70358
	RSJN01_78	399.2	3.7	1.34953
	RSJN01_79	12.06	0.65	0.119048
	RSJN01_82	231.5	2.5	0.760456
	RSJN01_9	13.03	0.41	0.109769
	RSJN01_92	549.8	5.7	0.645161
	RSJN01_93	283.7	2.7	0.52356
	ST02-12	483.7	4.7	1.45773
	ST02-13	487.2	5.3	2.10084
	ST02-14	488.6	3.6	0.898473
	ST02-20	497.9	5.8	0.892061
	ST02-21	473.4	7	1.03093
	ST02-22	482.9	5.5	0.799361
	ST02-28	497.1	6.4	1.11359
	ST02-29	479.6	5.8	1.89753
	ST02-31	516.2	6.4	1.16279
	ST02-39	491.5	5.9	1.3369
	TAL06 6	55.6	1.4	1.12994
	TAL06 60	40	3.1	0.698324
	TAL06m2 14	208.3	4.3	0.592768
	TAL06m2 29	153.2	2.6	1.28205
	TAL06m2 32	221	2.9	0.69979
	TAL06m2 35	42.9	3.6	1.221
	TAL06m2 41	66.6	1.5	1.05932
	TAL06m2 56	140.5	2.1	0.791766
	TAL06m2 65	42.2	2.1	0.997009
	TAL09 107	85.1	2	0.268097
	TAL09 23	42.3	1.3	1.22399
	TAL09 40	82	15	1.11857
	TAL09 90	217.7	4.6	1.35135
	TAL14 32	27.2	2.1	1.1236
	TAL14 42	182.6	4.3	1.58228
	TAL14 48	75.9	3	1.33156
	TAL14 50	52.4	1.1	1.16822
	TAL14 72	51.5	2.3	0.62422
	TAL16 104	185.1	8.6	0.877193
	TAL16 31	66.5	1.8	0.984252
Capaldi et al., 2020	VN05 110	16.7	0.97	0.955201
	VN05 128	35.5	2.7	0.746826
	VN05 130	233.9	9.8	0.976562
	VN05 19	23.1	1.8	0.816327
	VN05 20	15	1.2	0.713776
	VN05 21	54.6	2.4	1.0352
	VN05 27	62.5	2	0.459348
	VN05 34	226.6	6.2	1.07181
	VN05 35	15.5	1.6	0.896057
	VN05 41	232	9.7	1.02041
	VN05 44	16.3	1.2	0.897666
	VN05 45	267	5.1	0.425532
	VN05 47	232.7	4.9	1.66667
	VN05 48	220	8.2	1.97628
	VN05 56	341.5	7.3	1.0661
	VN05 57	157.9	4.8	0.551876
	VN05 58	63.3	2.5	0.785546
	VN05 59	257.9	6.6	0.390625
	VN05 60	303.9	5.7	0.829876
	VN05 63	249.6	4.4	0.492611
	VN05 65	62.8	1.2	1.50966
	VN05 71	347.9	7.7	0.469263
	VN05 77	251.4	8.1	0.51573
	VN05 79	58.9	3.2	0.917431
	VN05 80	317	11	0.509944
	VN05 84	65.3	2.8	0.747384
	VN05 85	254	10	1.33333
	VN05 86	300	11	0.633714
	VN05 90	63.9	2.6	0.660939
	AMP03 114	10.5	0.8	0.43802
	AMP03 119	4.2	0.34	0.491642
	AMP03 62	8.6	0.57	0.436872
	MGN04 1	14.9	0.38	0.58309
	MGN04 108	30.4	0.98	0.65703
	MGN04 109	28.7	1.2	0.535619
	MGN04 113	36.2	1.4	0.740741
	MGN04 121	41.3	1.5	0.392157
	MGN04 125	37.4	1.3	0.403063
	MGN04 19	13.8	0.58	0.724113
	MGN04 36	15.6	0.43	0.504796
	MGN04 37	21.7	0.71	0.840336
	MGN04 38	15.7	0.61	0.421763
	MGN04 40	24.5	0.39	0.671592
	MGN04 44	39.9	1.2	0.867303
	MGN04 51	15.9	0.5	0.480769
	MGN04 58	9.6	0.66	0.433276
	MGN04 62	12.8	0.46	0.643501
	MGN04 63	5.4	0.21	0.465549
	MGN04 7	20.4	0.54	0.347947
	MGN04 72	38.7	1.4	0.851789
	MGN04 73	9.9	0.37	0.284091
	MGN04 80	86.1	2.4	0.744048
	MGN04 91	37.9	1.4	0.754717
	MGN04 96	24.3	0.84	1.26103
	MGN04 97	24.7	0.74	0.445633
Willner et al., 2008
02CH38	42	329.741	7.41588	1.26751
	45	393.531	6.83965	0.781775
	47	467.586	9.0662	1.52323
	28	472.969	9.49021	0.0948286
	53	485.168	10.8166	1.60769
	2	490.913	11.4371	0.685625
	3	493.074	10.4284	0.268541
	39	493.355	9.08111	0.858518
	23II	500.326	11.205	0.525382
	38	505.409	10.8588	0.66943
	15	510.516	8.27186	0.379186
	59	511.266	7.36112	0.897034
	23	522.38	8.81474	0.409547
	35	529.05	13.4491	0.438739
	57	539.08	11.2068	0.608897
	17	539.477	18.6338	0.44363
02CH49	4B2	331.024	11.5666	0.473938
	14C	334.834	6.07926	0.102938
	11F	345.651	7.18775	0.111905
	10B2	387.906	10.4441	0.270039
	9D	390.49	8.52902	0.354401
	12A3	408.851	10.8843	0.423559
	4D	421.335	8.729	0.473938
	12B	456.411	8.71819	0.396704
	13B	514.691	21.8243	0.365555
	10C	515.245	13.7755	0.673389
	13A2core	537.688	19.8014	0.362055
	12C	545.85	14.6919	0.151921
	4A	316.425	5.28952	0.335129
06CH52a	4B	327.566	6.11682	0.335201
	3	337.352	6.08891	0.431283
	39	335.547	6.15608	0.450236
	29A	322.613	6.08363	0.854586
	29B	335.778	6.33668	0.516624
	28	329.984	6.52951	0.367715
	27	326.414	7.03263	0.816509
	24	335.63	5.75338	0.626123
	17	336.752	6.10616	0.389234
	18	314.866	5.90188	0.619865
	6	320.116	9.20182	0.184802
	8	224.146	6.09944	0.890121
	11	325.583	6.27255	0.460759
	5	314.827	5.60906	0.458888
	1	335.684	6.02769	0.605491
06CH53a	2	296.995	6.74547	0.29014
	1	340.17	7.31892	0.405907
	8	297.737	6.46777	0.565704
	4	318.983	6.11758	0.373859
	3	311.429	6.19958	0.311528
	6	289.708	5.58418	0.680536
	6	288.858	6.26708	0.401503
06CH53b	1	304.699	6.80674	0.341527
	8Arim	301.565	5.91534	0.532411
	7	299.094	5.81924	0.516055
06CH54	2 rim	470.416	12	0.624529
	79	294.577	10.1092	0.982485
	127	297.889	9.96336	1.05866
	20	298.701	6.08107	0.814128
	133	300.644	8.17523	0.540298
	120	301.202	8.5484	0.910972
	9	305.828	5.10258	0.927965
	2	306.627	8.47563	0.769742
	6	307.773	8.47922	0.226309
	132	312.596	6.4921	0.772703
	99r	318.514	6.29091	0.493105
	1	319.12	6.56443	0.456476
	96	319.548	17.1741	0.301567
	81	324.417	8.33526	0.288594
	41	326.948	7.00635	0.666909
	125	328.209	6.64949	0.750856
	91	328.731	9.34185	0.772803
	29	331.031	9.67785	0.643041
	94	331.435	8.30894	0.541089
	8	333.157	10.5207	0.5468
	109	333.488	7.69212	0.252697
	130	334.193	9.07112	0.421224
	45 rim	334.249	8.13516	0.473643
	5	334.461	7.18798	0.465191
	48 rim	334.697	10.2557	0.605203
	37	334.857	8.58066	0.355156
	131	334.992	7.43861	0.33104
	4	335.117	6.89358	0.420624
	27	335.728	9.62897	0.81914
	16	339.1	8.16653	0.473691
	50	340.346	9.87597	0.503376
	34	341.11	9.19774	0.89323
	28	345.289	8.56874	0.500734
	26	345.849	9.9777	0.584519
	103	365.114	9.53058	0.539899
	3	371.339	15.2836	0.70581
	32	373.64	8.26181	0.568006
	122	392.018	6.97765	0.55778
	88	400.067	6.87399	0.328043
	19	414.497	11.2574	0.458154
	110	424.66	11.9708	0.891397
	104	426.727	14.4252	0.368598
	39	443.04	13.5857	0.771893
	84	464.389	8.053	0.0915681
	133	466.939	8.64792	0.622743
	98	469.226	13.5774	0.73223
	137	520.959	14.7669	0.193486
	87	525.009	10.5134	0.652433
	50	529.827	12.6109	0.607278
	21	529.846	19.3391	0.684101
	85	536.093	14.8154	0.157043
	100	541.9	14.6114	0.380388
	93	544.319	15.7408	0.595589
	7	547.425	14.2359	0.122581
Pepper et al., 2016	BVICCH01 1	161.849	4.82172	1.39569
	BVILCH01 10	111.305	3.20596	0.967988
	BVILCH01 100	109.238	1.4215	0.647766
	BVILCH01 101	167.635	3.78273	0.877557
	BVILCH01 102	168.053	2.41654	0.708115
	BVILCH01 103	112.147	1.98725	1.03895
	BVILCH01 104	22.2846	1.71948	0.637676
	BVILCH01 105	209.444	4.0055	0.60092
	BVILCH01 106	169.744	2.03745	1.26211
	BVILCH01 107	112.219	1.68078	0.961327
	BVILCH01 108	95.2863	8.16215	0.714858
	BVILCH01 109	97.8712	2.05799	0.893596
	BVILCH01 11	98.4577	3.91711	0.958203
	BVILCH01 110	99.4906	3.95499	0.688817
	BVILCH01 111	164.509	2.28481	0.765471
	BVILCH01 112	97.8208	7.12956	0.830611
	BVILCH01 113	164.046	5.00447	0.944036
	BVILCH01 114	97.7359	5.17084	0.606809
	BVILCH01 115	212.04	3.39928	0.728598
	BVILCH01 12	111.412	2.45055	1.11613
	BVILCH01 13	208.099	2.79109	0.871213
	BVILCH01 14	210.825	2.96049	0.432809
	BVILCH01 15	168.38	3.64746	1.20138
	BVILCH01 16	89.9079	3.93135	0.614385
	BVILCH01 17	161.562	6.5299	1.0737
	BVILCH01 18	182.732	5.18592	0.878476
	BVILCH01 19	101.878	5.51833	0.754944
	BVILCH01 2	90.756	2.06254	0.749389
	BVILCH01 20	88.8491	3.37421	1.04222
	BVILCH01 21	89.8884	2.79403	1.07126
	BVILCH01 22	93.6871	3.26237	1.01285
	BVILCH01 23	95.4005	3.85529	0.934017
	BVILCH01 24	96.1244	4.5465	0.962871
	BVILCH01 25	90.3969	2.44495	0.99361
	BVILCH01 26	100.723	2.78643	0.616283
	BVILCH01 27	110.919	3.93632	0.563389
	BVILCH01 28	166.119	1.56693	1.06691
	BVILCH01 29	87.0406	4.12893	0.580982
	BVILCH01 3	166.587	3.22789	0.671215
	BVILCH01 30	102.52	2.02125	1.0033
	BVILCH01 31	161.298	4.68182	0.869995
	BVILCH01 32	97.3639	3.37773	0.969194
	BVILCH01 33	213.039	2.67906	0.554152
	BVILCH01 34	164.168	2.16093	1.15411
	BVILCH01 35	99.6543	4.25721	0.657448
	BVILCH01 36	96.4418	17.992	0.805413
	BVILCH01 37	109.485	3.03749	1.20107
	BVILCH01 38	95.9132	2.26997	1.07185
	BVILCH01 39	99.4091	2.72047	0.942006
	BVILCH01 4	90.9638	2.14777	0.813896
	BVILCH01 40	109.804	1.79016	0.823549
	BVILCH01 41	174.123	2.08939	0.748593
	BVILCH01 42	99.1633	1.84795	1.10679
	BVILCH01 43	288.516	5.22964	0.656327
	BVILCH01 44	170.299	2.00334	1.19665
	BVILCH01 45	95.2451	6.05738	0.843089
	BVILCH01 46	109.008	4.73489	1.52327
	BVILCH01 47	90.2249	4.56373	0.649266
	BVILCH01 48	165.317	2.77004	1.12837
	BVILCH01 49	92.1787	2.94847	0.916849
	BVILCH01 50	93.858	7.57853	0.667102
	BVILCH01 51	111.707	1.67998	0.720755
	BVILCH01 52	97.676	0.931794	1.73959
	BVILCH01 53	165.209	1.49182	0.754517
	BVILCH01 54	311.409	4.67271	0.455269
	BVILCH01 56	104.868	1.51393	0.819667
	BVILCH01 57	166.313	2.05919	1.02379
	BVILCH01 58	104.083	3.29861	0.9224
	BVILCH01 59	309.098	4.79249	0.803266
	BVILCH01 6	90.1058	3.563	0.847241
	BVILCH01 60	95.8138	2.19552	1.22844
	BVILCH01 61	165.501	4.62079	1.01252
	BVILCH01 62	163.942	1.91599	0.69177
	BVILCH01 63	163.48	6.07225	1.16144
	BVILCH01 64	110.226	0.944661	0.23274
	BVILCH01 66	167.86	2.12039	1.29164
	BVILCH01 67	91.3975	3.81222	0.562016
	BVILCH01 69	162.953	1.95503	1.20836
	BVILCH01 70	162.342	1.78593	1.20795
	BVILCH01 71	168.417	1.53942	1.39401
	BVILCH01 72	95.2048	4.67372	0.830399
	BVILCH01 73	167.796	3.07546	1.13079
	BVILCH01 74	165.308	1.40886	0.959328
	BVILCH01 75	110.601	3.72255	0.744449
	BVILCH01 76	167.561	2.49629	0.840607
	BVILCH01 77	98.8104	2.68235	0.696679
	BVILCH01 78	90.4299	4.33971	0.893384
	BVILCH01 79	96.3302	3.07617	0.845217
	BVILCH01 8	98.5478	5.40402	0.759554
	BVILCH01 80	92.29	1.07795	0.992256
	BVILCH01 81	166.34	4.21736	0.684733
	BVILCH01 82	110.799	2.50261	0.944425
	BVILCH01 83	167.348	2.46661	0.790694
	BVILCH01 84	167.653	12.3529	1.14445
	BVILCH01 85	106.168	3.42021	0.906395
	BVILCH01 86	162.492	5.25057	0.804358
	BVILCH01 87	164.87	1.9299	0.716158
	BVILCH01 88	165.972	3.01355	1.08037
	BVILCH01 89	165.605	1.49999	1.22399
	BVILCH01 9	404.773	4.54056	0.227868
	BVILCH01 90	100.293	2.58328	0.990955
	BVILCH01 91	90.7323	4.15031	0.817824
	BVILCH01 92	156.838	7.67365	0.645766
	BVILCH01 93	161.376	5.56219	0.792012
	BVILCH01 94	99.5516	9.01948	0.632464
	BVILCH01 95	164.918	2.27806	1.15681
	BVILCH01 96	93.8532	6.38034	0.609008
	BVILCH01 97	160.437	6.58727	0.739406
	BVILCH01 98	109.441	5.35687	0.699336
	BVILCH01 99	270.775	3.99052	0.701373
	RCHOCH01 1	103.41	11.0135	0.939643
	RCHOCH01 10	110.816	3.83252	0.878821
	RCHOCH01 100	106.077	0.844645	0.998983
	RCHOCH01 101	176.49	18.8697	0.868217
	RCHOCH01 102	14.5849	3.15474	0.715932
	RCHOCH01 103	19.5569	1.84854	0.699205
	RCHOCH01 104	69.765	1.1165	0.835031
	RCHOCH01 105	172.684	2.92025	0.671547
	RCHOCH01 108	109.596	2.62436	0.865982
	RCHOCH01 109	92.4233	1.86816	0.566292
	RCHOCH01 11	147.101	1.93467	1.41687
	RCHOCH01 110	107.465	1.19567	0.854852
	RCHOCH01 12	172.055	2.65852	0.554347
	RCHOCH01 13	110.416	2.09389	0.860886
	RCHOCH01 14	174.741	4.44535	0.777257
	RCHOCH01 15	168.303	2.42779	0.619071
	RCHOCH01 16	90.5477	3.41687	0.662017
	RCHOCH01 17	147.857	8.74801	0.694003
	RCHOCH01 18	173.118	5.75443	0.886756
	RCHOCH01 19	107.307	1.80451	0.612538
	RCHOCH01 2	144.648	2.4327	0.709596
	RCHOCH01 20	116.292	3.36053	0.632786
	RCHOCH01 21	172.8	2.68548	0.951009
	RCHOCH01 22	58.6989	1.77052	1.27682
	RCHOCH01 23	175.87	4.3733	0.795478
	RCHOCH01 24	113.231	3.83445	0.630485
	RCHOCH01 25	151.187	2.87604	0.605259
	RCHOCH01 26	16.8383	0.897536	0.280966
	RCHOCH01 27	44.005	1.64721	0.971436
	RCHOCH01 28	57.5682	0.418067	1.4765
	RCHOCH01 29	104.402	7.1013	1.04831
	RCHOCH01 3	20.635	3.27372	0.765574
	RCHOCH01 30	147.29	1.74132	1.04914
	RCHOCH01 31	151.318	2.57077	0.755733
	RCHOCH01 32	173.991	2.34491	0.604226
	RCHOCH01 33	149.772	1.04773	0.865113
	RCHOCH01 34	60.4641	2.84916	0.867017
	RCHOCH01 35	151.285	7.51194	1.03275
	RCHOCH01 36	175.268	3.66559	0.796655
	RCHOCH01 37	60.5585	2.16636	0.608176
	RCHOCH01 38	151.061	1.88012	1.18029
	RCHOCH01 39	58.1486	3.89004	0.699113
	RCHOCH01 4	177.027	3.16103	0.597958
	RCHOCH01 40	149.127	1.84463	1.20086
	RCHOCH01 41	149.675	2.92594	0.751145
	RCHOCH01 42	172.669	2.63683	0.49802
	RCHOCH01 43	171.33	1.52901	1.11569
	RCHOCH01 44	172.513	3.06598	0.589017
	RCHOCH01 45	149.13	3.75918	0.742546
	RCHOCH01 45	150.302	1.84268	0.997018
	RCHOCH01 47	70.1547	10.7605	0.745322
	RCHOCH01 48	68.9858	0.725545	0.985802
	RCHOCH01 49	114.85	1.82476	0.985972
	RCHOCH01 5	108.469	1.97273	0.822024
	RCHOCH01 50	297.091	3.03486	0.970576
	RCHOCH01 51	169.467	4.68563	0.177771
	RCHOCH01 52	151.615	1.46229	1.00758
	RCHOCH01 53	109.36	9.3253	0.824285
	RCHOCH01 54	20.5895	0.549736	1.09297
	RCHOCH01 55	146.921	2.6714	0.770135
	RCHOCH01 56	58.5152	1.76692	0.859232
	RCHOCH01 57	174.403	3.00889	0.652868
	RCHOCH01 58	151.407	2.65484	0.722688
	RCHOCH01 59	148.198	1.7862	1.12515
	RCHOCH01 6	145.133	2.21544	0.58749
	RCHOCH01 60	92.102	4.15778	0.733525
	RCHOCH01 61	148.985	2.90299	1.164
	RCHOCH01 62	148.599	2.13636	0.849908
	RCHOCH01 64	147.09	2.8126	1.17914
	RCHOCH01 65	154.505	1.82074	0.645877
	RCHOCH01 66	107.243	3.20565	0.735715
	RCHOCH01 67	152.143	1.919	1.02744
	RCHOCH01 68	111.669	1.32925	0.986711
	RCHOCH01 69	151.581	2.92767	1.36247
	RCHOCH01 7	59.3772	2.99169	0.718566
	RCHOCH01 70	673.504	18.173	1.01407
	RCHOCH01 71	19.9388	0.760438	1.00475
	RCHOCH01 72	19.8691	1.76011	1.02977
	RCHOCH01 73	146.059	1.92446	0.702032
	RCHOCH01 74	147.642	5.43097	0.719492
	RCHOCH01 75	140.854	1.46083	1.12781
	RCHOCH01 76	147.195	1.99803	0.705934
	RCHOCH01 77	143.312	4.43453	1.10152
	RCHOCH01 79	147.721	4.74466	0.738217
	RCHOCH01 8	155.588	3.16798	0.739708
	RCHOCH01 80	112.054	1.77799	0.312869
	RCHOCH01 81	149.455	1.80676	1.12465
	RCHOCH01 82	148.044	2.2086	0.870905
	RCHOCH01 83	111.838	2.74395	0.660606
	RCHOCH01 84	148.036	1.28891	0.683293
	RCHOCH01 85	58.109	2.55669	0.965971
	RCHOCH01 86	151.93	3.46335	1.0027
	RCHOCH01 87	146.44	1.55071	0.827506
	RCHOCH01 89	100.914	8.25946	0.618946
	RCHOCH01 9	288.194	3.65007	1.13714
	RCHOCH01 90	111.832	0.881357	0.752474
	RCHOCH01 91	169.043	21.2507	1.17419
	RCHOCH01 92	149.797	2.78551	0.522804
	RCHOCH01 93	153.974	3.76098	0.783021
	RCHOCH01 94	153.087	1.43924	0.860589
	RCHOCH01 95	108.553	3.25601	0.76794
	RCHOCH01 96	175.752	1.95255	2.042
	RCHOCH01 97	54.8487	3.0842	1.32302
	RCHOCH01 98	37.787	2.0654	0.60486
	RCHOCH01 99	117.115	2.3418	0.638459
	RCONCH01-1	284.575	5.05836	0.733256
	RCONCH01-10	15.6011	1.97113	1.0083
	RCONCH01-100	91.2396	2.06819	0.653262
	RCONCH01-101	93.9617	6.15901	0.717109
	RCONCH01-102	64.2061	1.98146	0.69761
	RCONCH01-103	290.413	4.46635	0.882663
	RCONCH01-104	221.165	2.79327	0.74503
	RCONCH01-105	241.917	13.3778	0.931179
	RCONCH01-106	64.1979	2.03988	0.779174
	RCONCH01-107	66.4054	3.31509	0.992893
	RCONCH01-108	51.6199	2.26316	1.37768
	RCONCH01-109	92.8265	2.05989	0.911174
	RCONCH01-11	65.2442	5.85262	0.89431
	RCONCH01-110	63.4681	7.67451	0.735313
	RCONCH01-12	66.8021	2.28501	1.05365
	RCONCH01-13	280.194	6.10461	0.67846
	RCONCH01-14	264.544	4.55112	0.968413
	RCONCH01-15	91.9137	3.08743	0.675652
	RCONCH01-16	64.9656	1.63238	1.12184
	RCONCH01-17	64.4347	1.22189	0.655602
	RCONCH01-18	282.063	15.1461	0.778025
	RCONCH01-19	295.392	5.33024	0.849223
	RCONCH01-20	64.7373	3.21718	0.758193
	RCONCH01-21	65.6511	2.0686	1.34518
	RCONCH01-24	65.7396	2.7845	0.69865
	RCONCH01-25	273.589	2.58431	0.531875
	RCONCH01-26	22.4469	3.80363	0.7113
	RCONCH01-27	294.078	2.3056	0.299131
	RCONCH01-28	67.6894	2.93199	0.334687
	RCONCH01-29	279.382	2.32881	0.649772
	RCONCH01-3	63.2621	6.15453	0.774156
	RCONCH01-30	243.364	6.8263	0.618751
	RCONCH01-31	168.119	1.808	1.2778
	RCONCH01-33	61.8763	6.52557	0.813907
	RCONCH01-34	219.756	1.71744	0.778038
	RCONCH01-35	326.019	5.71368	0.340686
	RCONCH01-36	54.9192	2.68407	0.817596
	RCONCH01-37	288.451	4.33226	0.475043
	RCONCH01-39	242.477	1.3948	0.645065
	RCONCH01-4	292.436	1.74479	0.67671
	RCONCH01-40	285.962	3.19417	0.598782
	RCONCH01-41	66.1076	1.73792	0.857605
	RCONCH01-42	57.1341	3.84133	0.727676
	RCONCH01-43	55.7027	6.69232	0.751961
	RCONCH01-44	57.6853	4.68375	1.20443
	RCONCH01-45	63.7135	2.84507	0.329809
	RCONCH01-46	57.7327	1.35719	2.13322
	RCONCH01-47	68.0716	3.54484	0.988549
	RCONCH01-48	308.274	16.273	0.566199
	RCONCH01-49	239.472	2.7315	1.27822
	RCONCH01-5	71.2	3.52715	0.757479
	RCONCH01-50	65.846	0.739658	0.945268
	RCONCH01-51	90.7868	3.24525	0.653759
	RCONCH01-53	292.331	4.53145	0.496883
	RCONCH01-54	91.8143	1.10434	0.782979
	RCONCH01-55	291.422	2.6143	0.504474
	RCONCH01-56	296.038	2.70913	0.679816
	RCONCH01-57	272.674	2.39268	0.596876
	RCONCH01-58	37.4573	1.28858	1.25146
	RCONCH01-59	63.7731	1.96542	0.963935
	RCONCH01-6	47.2529	9.40994	0.738718
	RCONCH01-60	124.65	1.95416	1.80543
	RCONCH01-61	65.0865	3.60419	0.893768
	RCONCH01-62	250.857	5.30946	1.72636
	RCONCH01-64	303.733	2.2539	0.479193
	RCONCH01-65	118.045	8.65263	0.45451
	RCONCH01-66	223.573	5.94839	1.0441
	RCONCH01-67	92.224	1.89449	0.82784
	RCONCH01-69	290.179	2.29912	0.887466
	RCONCH01-7	289.835	4.68972	0.725524
	RCONCH01-70	285.423	3.6115	0.421917
	RCONCH01-71	287.131	13.2761	0.81664
	RCONCH01-72	92.0013	3.81604	0.510412
	RCONCH01-73	91.5648	4.66958	0.841238
	RCONCH01-74	66.176	2.80514	1.02254
	RCONCH01-75	285.505	2.36397	0.675017
	RCONCH01-76	269.221	1.3496	0.771593
	RCONCH01-77	63.6208	4.17573	0.919137
	RCONCH01-78	37.7215	2.80071	0.614942
	RCONCH01-79	243.671	2.08365	1.23939
	RCONCH01-8	145.521	2.76921	1.48795
	RCONCH01-80	66.3222	1.73333	0.685167
	RCONCH01-81	158.255	1.14753	1.99904
	RCONCH01-82	234.844	2.47911	1.00324
	RCONCH01-83	251.868	4.68159	0.986227
	RCONCH01-84	329.532	3.42289	0.718819
	RCONCH01-85	291.553	3.41591	0.651883
	RCONCH01-86	69.4457	1.6987	0.782509
	RCONCH01-87	289.663	2.00784	0.932616
	RCONCH01-88	284.147	1.95776	0.756804
	RCONCH01-89	291.682	1.67203	0.853674
	RCONCH01-9	286.529	3.48324	0.68777
	RCONCH01-90	26.1876	3.91634	1.558
	RCONCH01-91	57.9139	2.99809	0.75187
	RCONCH01-92	286.461	4.2097	0.62264
	RCONCH01-94	258.938	4.9329	0.926033
	RCONCH01-95	296.237	4.79199	0.805648
	RCONCH01-96	295.855	2.2206	0.59731
	RCONCH01-97	329.714	1.49276	0.594539
	RCONCH01-98	297.003	3.16979	0.53399
	RCONCH01-99	66.2914	2.73825	0.692011

## Sheet: PlotDat1
Source sheet	retroarc_good	0	0
Plot name	ProbDens1	0.35	0
Plot Type	16	0.7	0
1st free col	5	1.05	0
Sigma Level	2	1.4	0
Absolute Errs	TRUE	1.75	0
Symbol Type	1	2.1	0
Inverse Plot	FALSE	2.45	0
Color Plot	TRUE	2.8	0
3D plot	FALSE	3.15	0
Linear	FALSE	3.5	5.42853e-07
Data Range	D3:E902	3.85	0.000313317
Filled Symbols	TRUE	4.2	0.00260866
ConcAge	FALSE	4.55	0.000313345
ConcSwap	FALSE	4.9	8.29546e-07
1st Symbol-row	1	5.25	0.00152389
		5.6	0.000696541
		5.95	0.000184975
		6.3	0.00270474
		6.65	0.00421708
		7	0.00430411
		7.35	0.00516527
		7.7	0.0101651
		8.05	0.0104817
		8.4	0.0107031
		8.75	0.0124015
		9.1	0.0117843
		9.45	0.0117968
		9.8	0.0109304
		10.15	0.00896241
		10.5	0.010087
		10.85	0.00714085
		11.2	0.00622737
		11.55	0.00741227
		11.9	0.00623149
		12.25	0.00336968
		12.6	0.00315902
		12.95	0.00647759
		13.3	0.00831758
		13.65	0.0107578
		14	0.0126179
		14.35	0.010495
		14.7	0.0127725
		15.05	0.0161597
		15.4	0.0170598
		15.75	0.0198239
		16.1	0.0141842
		16.45	0.00868936
		16.8	0.00648101
		17.15	0.00562451
		17.5	0.00465487
		17.85	0.00295669
		18.2	0.00208831
		18.55	0.00279246
		18.9	0.00433344
		19.25	0.00557197
		19.6	0.00768443
		19.95	0.0104924
		20.3	0.0107368
		20.65	0.0089717
		21	0.00763129
		21.35	0.00862139
		21.7	0.00974605
		22.05	0.00866626
		22.4	0.00730303
		22.75	0.00682107
		23.1	0.00582075
		23.45	0.00519175
		23.8	0.00591548
		24.15	0.00730122
		24.5	0.00959525
		24.85	0.0067665
		25.2	0.00428492
		25.55	0.00340117
		25.9	0.0039328
		26.25	0.00466857
		26.6	0.00444386
		26.95	0.00352782
		27.3	0.00244577
		27.65	0.0017234
		28	0.00179794
		28.35	0.00265341
		28.7	0.00363707
		29.05	0.00405567
		29.4	0.0040789
		29.75	0.0035616
		30.1	0.00259695
		30.45	0.00186257
		30.8	0.00121655
		31.15	0.000664645
		31.5	0.000438423
		31.85	0.000543757
		32.2	0.00087158
		32.55	0.00133706
		32.9	0.00189196
		33.25	0.00243572
		33.6	0.00278993
		33.95	0.00291041
		34.3	0.00297687
		34.65	0.00314645
		35	0.00340744
		35.35	0.00374828
		35.7	0.00440498
		36.05	0.00526131
		36.4	0.00529351
		36.75	0.00481637
		37.1	0.00467423
		37.45	0.00461597
		37.8	0.00441373
		38.15	0.00416915
		38.5	0.0040563
		38.85	0.00414249
		39.2	0.00435338
		39.55	0.00453272
		39.9	0.00453337
		40.25	0.00430349
		40.6	0.00389871
		40.95	0.00343485
		41.3	0.00304504
		41.65	0.00280531
		42	0.00266667
		42.35	0.00252
		42.7	0.00234756
		43.05	0.00225707
		43.4	0.00233448
		43.75	0.00250594
		44.1	0.00258485
		44.45	0.00243505
		44.8	0.00206837
		45.15	0.00161248
		45.5	0.00123125
		45.85	0.00108017
		46.2	0.0012175
		46.55	0.00142138
		46.9	0.00133291
		47.25	0.000958858
		47.6	0.000616318
		47.95	0.000448129
		48.3	0.000388535
		48.65	0.000373617
		49	0.000393904
		49.35	0.000459057
		49.7	0.000570578
		50.05	0.000709029
		50.4	0.000836134
		50.75	0.000917056
		51.1	0.000959929
		51.45	0.00104317
		51.8	0.00125275
		52.15	0.00152256
		52.5	0.0016357
		52.85	0.00151043
		53.2	0.00131242
		53.55	0.00120113
		53.9	0.0011808
		54.25	0.00120264
		54.6	0.00124957
		54.95	0.00132168
		55.3	0.00140864
		55.65	0.00148544
		56	0.00149812
		56.35	0.00136267
		56.7	0.00105567
		57.05	0.000693757
		57.4	0.000433655
		57.75	0.000326074
		58.1	0.000322065
		58.45	0.000361645
		58.8	0.000413894
		59.15	0.000468792
		59.5	0.000524066
		59.85	0.00058032
		60.2	0.000640872
		60.55	0.000712564
		60.9	0.000806556
		61.25	0.000941554
		61.6	0.00114938
		61.95	0.00145926
		62.3	0.00182995
		62.65	0.00209998
		63	0.00210224
		63.35	0.00185362
		63.7	0.00153243
		64.05	0.00128046
		64.4	0.00112275
		64.75	0.00104074
		65.1	0.00103634
		65.45	0.00112685
		65.8	0.0013067
		66.15	0.00152042
		66.5	0.00168096
		66.85	0.00172883
		67.2	0.00167295
		67.55	0.0015666
		67.9	0.00145213
		68.25	0.00133922
		68.6	0.00122461
		68.95	0.00111243
		69.3	0.00101346
		69.65	0.000935791
		70	0.000881336
		70.35	0.00084731
		70.7	0.000827355
		71.05	0.000811233
		71.4	0.00078569
		71.75	0.000738238
		72.1	0.000662786
		72.45	0.000563809
		72.8	0.000455851
		73.15	0.000357951
		73.5	0.000286064
		73.85	0.000247672
		74.2	0.00024083
		74.55	0.000256863
		74.9	0.000284328
		75.25	0.000312269
		75.6	0.000332133
		75.95	0.000338611
		76.3	0.000329814
		76.65	0.000306957
		77	0.000273614
		77.35	0.000234643
		77.7	0.000195027
		78.05	0.000158896
		78.4	0.00012898
		78.75	0.000106508
		79.1	9.14853e-05
		79.45	8.31493e-05
		79.8	8.04304e-05
		80.15	8.22982e-05
		80.5	8.79406e-05
		80.85	9.68243e-05
		81.2	0.000108688
		81.55	0.000123609
		81.9	0.000142279
		82.25	0.000166637
		82.6	0.000200747
		82.95	0.00025138
		83.3	0.000327096
		83.65	0.000434761
		84	0.000573936
		84.35	0.000732145
		84.7	0.000885363
		85.05	0.00100567
		85.4	0.00107257
		85.75	0.00108093
		86.1	0.00104041
		86.45	0.000967924
		86.8	0.000879023
		87.15	0.000783424
		87.5	0.000685459
		87.85	0.000586944
		88.2	0.000489707
		88.55	0.000396619
		88.9	0.000311333
		89.25	0.000237385
		89.6	0.000177284
		89.95	0.000131967
		90.3	0.000100785
		90.65	8.19298e-05
		91	7.30577e-05
		91.35	7.18574e-05
		91.7	7.63862e-05
		92.05	8.5171e-05
		92.4	9.71423e-05
		92.75	0.000111523
		93.1	0.000127766
		93.45	0.000145639
		93.8	0.000165449
		94.15	0.000188379
		94.5	0.000216673
		94.85	0.00025334
		95.2	0.000300986
		95.55	0.000359818
		95.9	0.000425528
		96.25	0.000488444
		96.6	0.000535163
		96.95	0.000552774
		97.3	0.000533947
		97.65	0.000480265
		98	0.000401845
		98.35	0.000313444
		98.7	0.0002292
		99.05	0.000158649
		99.4	0.000105457
		99.75	6.85826e-05
		100.1	4.4526e-05
		100.45	2.935e-05
		100.8	1.98264e-05
		101.15	1.37568e-05
		101.5	9.81952e-06
		101.85	7.27969e-06
		102.2	5.74495e-06
		102.55	5.01484e-06
		102.9	5.0047e-06
		103.25	5.71185e-06
		103.6	7.2017e-06
		103.95	9.59564e-06
		104.3	1.30619e-05
		104.65	1.77993e-05
		105	2.40166e-05
		105.35	3.1905e-05
		105.7	4.16066e-05
		106.05	5.3179e-05
		106.4	6.6561e-05
		106.75	8.15436e-05
		107.1	9.77518e-05
		107.45	0.000114646
		107.8	0.000131535
		108.15	0.000147621
		108.5	0.000162052
		108.85	0.000174002
		109.2	0.000182742
		109.55	0.000187716
		109.9	0.000188599
		110.25	0.000185332
		110.6	0.000178129
		110.95	0.00016745
		111.3	0.00015396
		111.65	0.000138452
		112	0.000121775
		112.35	0.000104758
		112.7	8.81415e-05
		113.05	7.25342e-05
		113.4	5.83813e-05
		113.75	4.59592e-05
		114.1	3.53866e-05
		114.45	2.66486e-05
		114.8	1.96281e-05
		115.15	1.41401e-05
		115.5	9.96315e-06
		115.85	6.86613e-06
		116.2	4.62809e-06
		116.55	3.05118e-06
		116.9	1.96749e-06
		117.25	1.23998e-06
		117.6	7.64789e-07
		117.95	4.63603e-07
		118.3	2.80282e-07
		118.65	1.84071e-07
		119	1.72536e-07
		119.35	2.91384e-07
		119.7	6.7818e-07
		120.05	1.64356e-06
		120.4	3.79684e-06
		120.75	8.20025e-06
		121.1	1.64907e-05
		121.45	3.08508e-05
		121.8	5.36863e-05
		122.15	8.68921e-05
		122.5	0.000130803
		122.85	0.000183136
		123.2	0.000238479
		123.55	0.000288833
		123.9	0.00032536
		124.25	0.00034088
		124.6	0.000332169
		124.95	0.000301048
		125.3	0.000253766
		125.65	0.000198953
		126	0.000145074
		126.35	9.83902e-05
		126.7	6.20666e-05
		127.05	3.64177e-05
		127.4	1.98795e-05
		127.75	1.01023e-05
		128.1	4.79094e-06
		128.45	2.14077e-06
		128.8	9.36206e-07
		129.15	4.57471e-07
		129.5	3.27052e-07
		129.85	3.7266e-07
		130.2	5.33108e-07
		130.55	8.04493e-07
		130.9	1.21324e-06
		131.25	1.80984e-06
		131.6	2.6608e-06
		131.95	3.84907e-06
		132.3	5.48068e-06
		132.65	7.68315e-06
		133	1.06035e-05
		133.35	1.44046e-05
		133.7	1.92732e-05
		134.05	2.54106e-05
		134.4	3.30343e-05
		134.75	4.23785e-05
		135.1	5.36969e-05
		135.45	6.72703e-05
		135.8	8.34077e-05
		136.15	0.00010247
		136.5	0.000124903
		136.85	0.000151342
		137.2	0.000182853
		137.55	0.000221332
		137.9	0.000269959
		138.25	0.000333273
		138.6	0.00041616
		138.95	0.000521237
		139.3	0.000645166
		139.65	0.000776062
		140	0.000894793
		140.35	0.000981274
		140.7	0.0010232
		141.05	0.00102203
		141.4	0.000992039
		141.75	0.000953049
		142.1	0.000921357
		142.45	0.000904149
		142.8	0.000899384
		143.15	0.000899563
		143.5	0.000896343
		143.85	0.000883774
		144.2	0.000859576
		144.55	0.000824885
		144.9	0.000783227
		145.25	0.00073929
		145.6	0.000697914
		145.95	0.000663503
		146.3	0.000639926
		146.65	0.000630663
		147	0.000638831
		147.35	0.000666485
		147.7	0.000713112
		148.05	0.000773802
		148.4	0.000838388
		148.75	0.000892914
		149.1	0.000923724
		149.45	0.000922761
		149.8	0.000891432
		150.15	0.000840846
		150.5	0.000788108
		150.85	0.000750506
		151.2	0.000740248
		151.55	0.000761585
		151.9	0.000810751
		152.25	0.00087799
		152.6	0.000950741
		152.95	0.0010171
		153.3	0.00106883
		153.65	0.00110321
		154	0.00112319
		154.35	0.0011359
		154.7	0.0011501
		155.05	0.00117363
		155.4	0.00121174
		155.75	0.00126653
		156.1	0.00133735
		156.45	0.00142175
		156.8	0.00151625
		157.15	0.00161697
		157.5	0.00171984
		157.85	0.0018208
		158.2	0.00191589
		158.55	0.00200139
		158.9	0.00207415
		159.25	0.00213177
		159.6	0.00217282
		159.95	0.00219698
		160.3	0.002205
		160.65	0.00219855
		161	0.00217987
		161.35	0.00215136
		161.7	0.00211508
		162.05	0.00207227
		162.4	0.00202315
		162.75	0.00196704
		163.1	0.00190291
		163.45	0.00183025
		163.8	0.00174993
		164.15	0.00166483
		164.5	0.00157997
		164.85	0.00150188
		165.2	0.00143752
		165.55	0.00139301
		165.9	0.00137237
		166.25	0.00137683
		166.6	0.00140457
		166.95	0.00145102
		167.3	0.00150952
		167.65	0.00157227
		168	0.00163124
		168.35	0.00167907
		168.7	0.00170985
		169.05	0.00171965
		169.4	0.00170676
		169.75	0.00167168
		170.1	0.00161682
		170.45	0.00154595
		170.8	0.00146361
		171.15	0.0013745
		171.5	0.00128296
		171.85	0.00119269
		172.2	0.00110656
		172.55	0.00102664
		172.9	0.000954363
		173.25	0.00089069
		173.6	0.000836249
		173.95	0.000791467
		174.3	0.000756614
		174.65	0.000731804
		175	0.00071694
		175.35	0.000711669
		175.7	0.000715328
		176.05	0.000726928
		176.4	0.000745175
		176.75	0.000768524
		177.1	0.00079527
		177.45	0.000823665
		177.8	0.000852021
		178.15	0.000878829
		178.5	0.000902843
		178.85	0.000923121
		179.2	0.000939043
		179.55	0.000950289
		179.9	0.000956779
		180.25	0.000958607
		180.6	0.000955968
		180.95	0.000949103
		181.3	0.000938265
		181.65	0.000923715
		182	0.000905735
		182.35	0.000884667
		182.7	0.000860936
		183.05	0.000835065
		183.4	0.000807671
		183.75	0.000779427
		184.1	0.000750995
		184.45	0.000722971
		184.8	0.000695802
		185.15	0.000669759
		185.5	0.000644893
		185.85	0.000621064
		186.2	0.000597979
		186.55	0.000575249
		186.9	0.000552466
		187.25	0.000529272
		187.6	0.000505405
		187.95	0.000480742
		188.3	0.000455307
		188.65	0.000429258
		189	0.000402862
		189.35	0.000376458
		189.7	0.000350418
		190.05	0.000325111
		190.4	0.000300869
		190.75	0.00027797
		191.1	0.000256625
		191.45	0.000236981
		191.8	0.000219124
		192.15	0.000203096
		192.5	0.000188905
		192.85	0.000176552
		193.2	0.000166036
		193.55	0.000157381
		193.9	0.000150635
		194.25	0.000145882
		194.6	0.000143241
		194.95	0.000142862
		195.3	0.000144914
		195.65	0.000149563
		196	0.000156951
		196.35	0.000167172
		196.7	0.000180235
		197.05	0.000196037
		197.4	0.000214338
		197.75	0.000234747
		198.1	0.00025671
		198.45	0.000279524
		198.8	0.000302362
		199.15	0.000324319
		199.5	0.00034446
		199.85	0.000361895
		200.2	0.000375852
		200.55	0.000385741
		200.9	0.000391222
		201.25	0.000392251
		201.6	0.000389113
		201.95	0.000382427
		202.3	0.000373134
		202.65	0.00036245
		203	0.000351805
		203.35	0.000342755
		203.7	0.000336866
		204.05	0.00033559
		204.4	0.000340119
		204.75	0.000351249
		205.1	0.000369254
		205.45	0.000393789
		205.8	0.000423855
		206.15	0.000457839
		206.5	0.000493612
		206.85	0.000528728
		207.2	0.000560668
		207.55	0.000587117
		207.9	0.000606235
		208.25	0.000616878
		208.6	0.000618725
		208.95	0.000612302
		209.3	0.000598901
		209.65	0.000580397
		210	0.000559014
		210.35	0.000537059
		210.7	0.000516688
		211.05	0.000499724
		211.4	0.000487551
		211.75	0.000481101
		212.1	0.000480913
		212.45	0.000487265
		212.8	0.000500355
		213.15	0.000520494
		213.5	0.000548269
		213.85	0.000584616
		214.2	0.00063069
		214.55	0.000687509
		214.9	0.000755332
		215.25	0.000832914
		215.6	0.000916894
		215.95	0.00100166
		216.3	0.00107996
		216.65	0.00114426
		217	0.00118856
		217.35	0.00121013
		217.7	0.00121035
		218.05	0.00119451
		218.4	0.00117032
		218.75	0.00114583
		219.1	0.00112726
		219.45	0.00111747
		219.8	0.00111559
		220.15	0.00111766
		220.5	0.00111819
		220.85	0.00111206
		221.2	0.00109624
		221.55	0.00107073
		221.9	0.0010386
		222.25	0.00100524
		222.6	0.000977018
		222.95	0.00096005
		223.3	0.000959224
		223.65	0.00097785
		224	0.0010179
		224.35	0.00108077
		224.7	0.00116841
		225.05	0.00128393
		225.4	0.00143048
		225.75	0.0016071
		226.1	0.00180272
		226.45	0.00199278
		226.8	0.00214434
		227.15	0.00223011
		227.5	0.00224349
		227.85	0.00220343
		228.2	0.00214511
		228.55	0.00210342
		228.9	0.00210072
		229.25	0.00214408
		229.6	0.00222936
		229.95	0.00234625
		230.3	0.00248109
		230.65	0.00261811
		231	0.00274101
		231.35	0.00283557
		231.7	0.00289279
		232.05	0.00291096
		232.4	0.00289541
		232.75	0.00285614
		233.1	0.00280431
		233.45	0.00274919
		233.8	0.00269655
		234.15	0.00264881
		234.5	0.00260617
		234.85	0.00256821
		235.2	0.00253499
		235.55	0.00250768
		235.9	0.00248868
		236.25	0.00248136
		236.6	0.00248972
		236.95	0.00251812
		237.3	0.00257099
		237.65	0.00265266
		238	0.00276708
		238.35	0.00291717
		238.7	0.00310379
		239.05	0.00332418
		239.4	0.00357038
		239.75	0.00382822
		240.1	0.00407787
		240.45	0.00429642
		240.8	0.00446226
		241.15	0.00456004
		241.5	0.00458463
		241.85	0.00454237
		242.2	0.00444934
		242.55	0.00432719
		242.9	0.00419814
		243.25	0.00408083
		243.6	0.00398776
		243.95	0.0039249
		244.3	0.00389256
		244.65	0.00388728
		245	0.00390379
		245.35	0.00393675
		245.7	0.00398201
		246.05	0.00403725
		246.4	0.00410205
		246.75	0.00417741
		247.1	0.00426498
		247.45	0.00436607
		247.8	0.00448085
		248.15	0.00460769
		248.5	0.00474298
		248.85	0.00488129
		249.2	0.00501586
		249.55	0.00513943
		249.9	0.00524508
		250.25	0.00532716
		250.6	0.00538195
		250.95	0.00540806
		251.3	0.00540652
		251.65	0.00538042
		252	0.00533427
		252.35	0.00527318
		252.7	0.005202
		253.05	0.00512458
		253.4	0.00504342
		253.75	0.00495959
		254.1	0.00487304
		254.45	0.00478317
		254.8	0.00468942
		255.15	0.00459187
		255.5	0.00449157
		255.85	0.00439069
		256.2	0.00429249
		256.55	0.00420123
		256.9	0.00412202
		257.25	0.00406042
		257.6	0.00402181
		257.95	0.00401005
		258.3	0.00402594
		258.65	0.00406597
		259	0.00412207
		259.35	0.00418309
		259.7	0.00423754
		260.05	0.00427681
		260.4	0.00429722
		260.75	0.00430041
		261.1	0.00429182
		261.45	0.00427843
		261.8	0.00426664
		262.15	0.00426121
		262.5	0.00426503
		262.85	0.00427959
		263.2	0.00430566
		263.55	0.00434369
		263.9	0.0043941
		264.25	0.00445725
		264.6	0.00453316
		264.95	0.00462109
		265.3	0.00471914
		265.65	0.00482405
		266	0.00493163
		266.35	0.00503768
		266.7	0.00513886
		267.05	0.00523245
		267.4	0.00531391
		267.75	0.00537305
		268.1	0.00539209
		268.45	0.00534921
		268.8	0.00522805
		269.15	0.0050281
		269.5	0.00476853
		269.85	0.00448206
		270.2	0.00420284
		270.55	0.00395606
		270.9	0.00375463
		271.25	0.00360201
		271.6	0.00349726
		271.95	0.00343851
		272.3	0.00342419
		272.65	0.00345304
		273	0.00352419
		273.35	0.00363769
		273.7	0.00379474
		274.05	0.00399618
		274.4	0.00423918
		274.75	0.00451317
		275.1	0.0047971
		275.45	0.0050603
		275.8	0.00526714
		276.15	0.00538442
		276.5	0.00538924
		276.85	0.00527492
		277.2	0.00505348
		277.55	0.0047536
		277.9	0.00441424
		278.25	0.00407527
		278.6	0.00376802
		278.95	0.00350946
		279.3	0.00330215
		279.65	0.00313983
		280	0.00301555
		280.35	0.00292813
		280.7	0.00288367
		281.05	0.00289152
		281.4	0.00295727
		281.75	0.00307654
		282.1	0.00323313
		282.45	0.00340242
		282.8	0.00355819
		283.15	0.00367977
		283.5	0.00375649
		283.85	0.00378834
		284.2	0.00378351
		284.55	0.00375459
		284.9	0.00371498
		285.25	0.00367642
		285.6	0.00364786
		285.95	0.00363535
		286.3	0.00364253
		286.65	0.00367149
		287	0.00372333
		287.35	0.00379837
		287.7	0.00389588
		288.05	0.00401331
		288.4	0.00414559
		288.75	0.00428472
		289.1	0.00442
		289.45	0.00453888
		289.8	0.00462865
		290.15	0.00467834
		290.5	0.0046807
		290.85	0.00463373
		291.2	0.0045413
		291.55	0.00441269
		291.9	0.00426094
		292.25	0.00410064
		292.6	0.00394542
		292.95	0.00380595
		293.3	0.00368888
		293.65	0.00359664
		294	0.00352819
		294.35	0.0034801
		294.7	0.00344775
		295.05	0.00342639
		295.4	0.00341173
		295.75	0.0034003
		296.1	0.00338942
		296.45	0.00337701
		296.8	0.00336136
		297.15	0.003341
		297.5	0.00331472
		297.85	0.00328181
		298.2	0.0032423
		298.55	0.00319726
		298.9	0.00314889
		299.25	0.0031003
		299.6	0.00305513
		299.95	0.00301694
		300.3	0.00298866
		300.65	0.00297215
		301	0.00296799
		301.35	0.00297559
		301.7	0.00299345
		302.05	0.00301966
		302.4	0.00305233
		302.75	0.00309011
		303.1	0.00313249
		303.45	0.0031799
		303.8	0.0032335
		304.15	0.00329455
		304.5	0.00336344
		304.85	0.00343863
		305.2	0.0035158
		305.55	0.00358786
		305.9	0.00364594
		306.25	0.00368128
		306.6	0.00368747
		306.95	0.0036622
		307.3	0.00360777
		307.65	0.00353032
		308	0.00343802
		308.35	0.00333903
		308.7	0.00323994
		309.05	0.00314508
		309.4	0.00305663
		309.75	0.00297512
		310.1	0.00290019
		310.45	0.00283107
		310.8	0.00276693
		311.15	0.00270696
		311.5	0.00265043
		311.85	0.00259664
		312.2	0.00254498
		312.55	0.00249489
		312.9	0.00244595
		313.25	0.00239788
		313.6	0.00235052
		313.95	0.00230386
		314.3	0.00225792
		314.65	0.00221272
		315	0.00216816
		315.35	0.00212401
		315.7	0.00207982
		316.05	0.00203495
		316.4	0.00198862
		316.75	0.00194007
		317.1	0.00188866
		317.45	0.00183407
		317.8	0.00177644
		318.15	0.0017165
		318.5	0.00165563
		318.85	0.00159581
		319.2	0.0015395
		319.55	0.00148945
		319.9	0.00144847
		320.25	0.00141912
		320.6	0.0014035
		320.95	0.00140298
		321.3	0.00141815
		321.65	0.00144875
		322	0.00149377
		322.35	0.00155159
		322.7	0.00162025
		323.05	0.00169763
		323.4	0.00178161
		323.75	0.00187011
		324.1	0.00196104
		324.45	0.00205206
		324.8	0.00214042
		325.15	0.00222277
		325.5	0.00229519
		325.85	0.00235341
		326.2	0.00239332
		326.55	0.0024116
		326.9	0.00240637
		327.25	0.00237766
		327.6	0.00232758
		327.95	0.00226004
		328.3	0.0021802
		328.65	0.0020937
		329	0.00200579
		329.35	0.00192074
		329.7	0.00184145
		330.05	0.00176941
		330.4	0.00170497
		330.75	0.00164768
		331.1	0.00159674
		331.45	0.00155142
		331.8	0.00151121
		332.15	0.00147603
		332.5	0.00144609
		332.85	0.00142183
		333.2	0.00140376
		333.55	0.00139227
		333.9	0.00138753
		334.25	0.00138943
		334.6	0.00139758
		334.95	0.00141136
		335.3	0.00143004
		335.65	0.00145284
		336	0.00147904
		336.35	0.00150801
		336.7	0.00153919
		337.05	0.00157202
		337.4	0.00160584
		337.75	0.00163976
		338.1	0.00167259
		338.45	0.00170287
		338.8	0.00172892
		339.15	0.0017491
		339.5	0.00176201
		339.85	0.0017668
		340.2	0.00176337
		340.55	0.00175241
		340.9	0.00173537
		341.25	0.00171422
		341.6	0.00169117
		341.95	0.00166828
		342.3	0.00164717
		342.65	0.00162876
		343	0.00161319
		343.35	0.00159986
		343.7	0.00158757
		344.05	0.00157474
		344.4	0.00155975
		344.75	0.00154112
		345.1	0.00151779
		345.45	0.00148924
		345.8	0.00145555
		346.15	0.00141734
		346.5	0.00137567
		346.85	0.0013319
		347.2	0.00128747
		347.55	0.00124379
		347.9	0.00120207
		348.25	0.00116329
		348.6	0.00112811
		348.95	0.00109697
		349.3	0.00107004
		349.65	0.00104737
		350	0.00102887
		350.35	0.00101437
		350.7	0.00100365
		351.05	0.00099643
		351.4	0.000992371
		351.75	0.000991044
		352.1	0.000991932
		352.45	0.000994422
		352.8	0.000997816
		353.15	0.00100136
		353.5	0.00100427
		353.85	0.00100581
		354.2	0.00100533
		354.55	0.00100229
		354.9	0.000996358
		355.25	0.000987395
		355.6	0.00097548
		355.95	0.00096089
		356.3	0.000944077
		356.65	0.000925627
		357	0.000906207
		357.35	0.000886511
		357.7	0.000867216
		358.05	0.000848935
		358.4	0.000832194
		358.75	0.000817412
		359.1	0.000804886
		359.45	0.000794817
		359.8	0.000787298
		360.15	0.00078234
		360.5	0.000779885
		360.85	0.000779822
		361.2	0.000782002
		361.55	0.000786254
		361.9	0.000792402
		362.25	0.000800275
		362.6	0.000809728
		362.95	0.000820654
		363.3	0.000833006
		363.65	0.000846774
		364	0.000861989
		364.35	0.000878676
		364.7	0.000896793
		365.05	0.000916156
		365.4	0.000936348
		365.75	0.000956644
		366.1	0.000975978
		366.45	0.000992957
		366.8	0.00100595
		367.15	0.00101324
		367.5	0.00101324
		367.85	0.00100474
		368.2	0.000987073
		368.55	0.000960271
		368.9	0.000925112
		369.25	0.00088303
		369.6	0.000835958
		369.95	0.00078609
		370.3	0.000735629
		370.65	0.000686561
		371	0.000640488
		371.35	0.000598536
		371.7	0.000561343
		372.05	0.000529111
		372.4	0.000501695
		372.75	0.000478712
		373.1	0.000459639
		373.45	0.000443897
		373.8	0.000430911
		374.15	0.000420148
		374.5	0.00041113
		374.85	0.000403443
		375.2	0.000396731
		375.55	0.000390691
		375.9	0.000385067
		376.25	0.000379649
		376.6	0.000374264
		376.95	0.000368779
		377.3	0.000363104
		377.65	0.000357184
		378	0.000351001
		378.35	0.000344577
		378.7	0.000337965
		379.05	0.000331253
		379.4	0.000324552
		379.75	0.000318001
		380.1	0.000311755
		380.45	0.00030598
		380.8	0.000300847
		381.15	0.000296526
		381.5	0.00029318
		381.85	0.000290954
		382.2	0.000289977
		382.55	0.000290351
		382.9	0.000292149
		383.25	0.000295415
		383.6	0.000300152
		383.95	0.00030633
		384.3	0.000313888
		384.65	0.000322723
		385	0.000332702
		385.35	0.000343663
		385.7	0.000355418
		386.05	0.000367759
		386.4	0.000380462
		386.75	0.000393295
		387.1	0.000406024
		387.45	0.000418412
		387.8	0.000430236
		388.15	0.000441287
		388.5	0.000451377
		388.85	0.000460336
		389.2	0.00046803
		389.55	0.000474352
		389.9	0.000479228
		390.25	0.000482618
		390.6	0.000484512
		390.95	0.000484938
		391.3	0.000483953
		391.65	0.000481641
		392	0.000478125
		392.35	0.000473552
		392.7	0.000468108
		393.05	0.000462027
		393.4	0.000455599
		393.75	0.000449184
		394.1	0.000443234
		394.45	0.000438296
		394.8	0.00043501
		395.15	0.000434076
		395.5	0.000436202
		395.85	0.000441996
		396.2	0.000451846
		396.55	0.00046578
		396.9	0.000483338
		397.25	0.000503513
		397.6	0.000524753
		397.95	0.00054509
		398.3	0.00056237
		398.65	0.000574557
		399	0.000580046
		399.35	0.00057794
		399.7	0.000568209
		400.05	0.000551706
		400.4	0.000530021
		400.75	0.000505231
		401.1	0.000479578
		401.45	0.000455169
		401.8	0.000433731
		402.15	0.000416485
		402.5	0.000404106
		402.85	0.000396797
		403.2	0.0003944
		403.55	0.000396539
		403.9	0.000402751
		404.25	0.00041258
		404.6	0.000425647
		404.95	0.000441684
		405.3	0.00046054
		405.65	0.000482185
		406	0.000506694
		406.35	0.000534234
		406.7	0.00056505
		407.05	0.000599417
		407.4	0.0006376
		407.75	0.00067977
		408.1	0.0007259
		408.45	0.000775661
		408.8	0.000828324
		409.15	0.000882682
		409.5	0.000937075
		409.85	0.000989457
		410.2	0.00103759
		410.55	0.00107925
		410.9	0.00111256
		411.25	0.00113614
		411.6	0.00114939
		411.95	0.00115246
		412.3	0.00114628
		412.65	0.00113233
		413	0.00111246
		413.35	0.00108862
		413.7	0.00106266
		414.05	0.00103617
		414.4	0.00101041
		414.75	0.000986266
		415.1	0.000964318
		415.45	0.000944897
		415.8	0.000928149
		416.15	0.000914093
		416.5	0.00090266
		416.85	0.000893718
		417.2	0.000887085
		417.55	0.000882533
		417.9	0.000879796
		418.25	0.000878583
		418.6	0.000878585
		418.95	0.000879492
		419.3	0.000881014
		419.65	0.000882888
		420	0.000884888
		420.35	0.000886831
		420.7	0.000888575
		421.05	0.000890024
		421.4	0.000891115
		421.75	0.000891818
		422.1	0.000892122
		422.45	0.000892036
		422.8	0.000891577
		423.15	0.000890765
		423.5	0.000889627
		423.85	0.000888187
		424.2	0.000886459
		424.55	0.000884456
		424.9	0.000882181
		425.25	0.000879629
		425.6	0.000876784
		425.95	0.000873629
		426.3	0.000870129
		426.65	0.000866246
		427	0.000861933
		427.35	0.00085714
		427.7	0.000851812
		428.05	0.0008459
		428.4	0.000839355
		428.75	0.000832146
		429.1	0.000824252
		429.45	0.000815671
		429.8	0.000806429
		430.15	0.000796575
		430.5	0.000786189
		430.85	0.000775384
		431.2	0.000764301
		431.55	0.00075311
		431.9	0.000742008
		432.25	0.000731207
		432.6	0.000720938
		432.95	0.000711437
		433.3	0.000702937
		433.65	0.000695666
		434	0.000689837
		434.35	0.000685639
		434.7	0.000683239
		435.05	0.000682771
		435.4	0.000684337
		435.75	0.000688006
		436.1	0.000693815
		436.45	0.000701761
		436.8	0.000711812
		437.15	0.000723912
		437.5	0.00073799
		437.85	0.000753964
		438.2	0.000771772
		438.55	0.000791404
		438.9	0.000812945
		439.25	0.000836622
		439.6	0.000862849
		439.95	0.000892228
		440.3	0.000925501
		440.65	0.000963411
		441	0.00100646
		441.35	0.00105461
		441.7	0.00110699
		442.05	0.00116166
		442.4	0.00121569
		442.75	0.00126542
		443.1	0.00130705
		443.45	0.00133737
		443.8	0.00135444
		444.15	0.00135805
		444.5	0.00134975
		444.85	0.00133254
		445.2	0.00131017
		445.55	0.0012864
		445.9	0.00126428
		446.25	0.00124579
		446.6	0.0012317
		446.95	0.00122175
		447.3	0.00121497
		447.65	0.00121005
		448	0.00120572
		448.35	0.00120092
		448.7	0.00119493
		449.05	0.00118741
		449.4	0.00117838
		449.75	0.00116807
		450.1	0.0011569
		450.45	0.00114539
		450.8	0.0011341
		451.15	0.00112359
		451.5	0.00111446
		451.85	0.00110742
		452.2	0.00110342
		452.55	0.00110381
		452.9	0.00111048
		453.25	0.00112574
		453.6	0.00115193
		453.95	0.00119066
		454.3	0.00124166
		454.65	0.00130193
		455	0.00136544
		455.35	0.00142409
		455.7	0.0014697
		456.05	0.00149657
		456.4	0.00150338
		456.75	0.00149377
		457.1	0.0014751
		457.45	0.00145598
		457.8	0.0014437
		458.15	0.00144246
		458.5	0.00145283
		458.85	0.00147248
		459.2	0.00149744
		459.55	0.00152356
		459.9	0.00154749
		460.25	0.00156728
		460.6	0.00158252
		460.95	0.00159415
		461.3	0.00160413
		461.65	0.00161497
		462	0.00162922
		462.35	0.00164918
		462.7	0.00167648
		463.05	0.00171198
		463.4	0.00175568
		463.75	0.00180678
		464.1	0.0018638
		464.45	0.00192475
		464.8	0.00198731
		465.15	0.00204901
		465.5	0.00210743
		465.85	0.0021603
		466.2	0.00220571
		466.55	0.00224216
		466.9	0.00226869
		467.25	0.00228489
		467.6	0.00229092
		467.95	0.00228749
		468.3	0.00227578
		468.65	0.00225736
		469	0.00223402
		469.35	0.00220768
		469.7	0.00218024
		470.05	0.00215341
		470.4	0.00212867
		470.75	0.00210715
		471.1	0.0020896
		471.45	0.00207636
		471.8	0.00206744
		472.15	0.00206255
		472.5	0.00206118
		472.85	0.00206275
		473.2	0.00206666
		473.55	0.00207243
		473.9	0.0020797
		474.25	0.00208833
		474.6	0.00209834
		474.95	0.00210987
		475.3	0.00212313
		475.65	0.00213829
		476	0.0021554
		476.35	0.00217434
		476.7	0.00219475
		477.05	0.00221608
		477.4	0.00223761
		477.75	0.00225853
		478.1	0.00227808
		478.45	0.00229561
		478.8	0.0023107
		479.15	0.0023232
		479.5	0.00233329
		479.85	0.00234138
		480.2	0.0023481
		480.55	0.00235419
		480.9	0.00236037
		481.25	0.00236729
		481.6	0.00237541
		481.95	0.00238498
		482.3	0.00239607
		482.65	0.0024086
		483	0.00242246
		483.35	0.00243759
		483.7	0.00245408
		484.05	0.00247233
		484.4	0.00249298
		484.75	0.00251699
		485.1	0.00254546
		485.45	0.00257948
		485.8	0.00261985
		486.15	0.00266683
		486.5	0.00271988
		486.85	0.00277748
		487.2	0.00283716
		487.55	0.00289567
		487.9	0.00294932
		488.25	0.00299441
		488.6	0.00302775
		488.95	0.00304706
		489.3	0.00305122
		489.65	0.00304034
		490	0.0030156
		490.35	0.00297901
		490.7	0.00293299
		491.05	0.00288011
		491.4	0.00282277
		491.75	0.00276311
		492.1	0.0027029
		492.45	0.00264363
		492.8	0.00258656
		493.15	0.00253276
		493.5	0.00248318
		493.85	0.00243866
		494.2	0.00239988
		494.55	0.00236731
		494.9	0.00234115
		495.25	0.00232132
		495.6	0.00230738
		495.95	0.00229861
		496.3	0.00229396
		496.65	0.00229221
		497	0.00229201
		497.35	0.002292
		497.7	0.0022909
		498.05	0.00228763
		498.4	0.00228135
		498.75	0.00227153
		499.1	0.002258
		499.45	0.00224089
		499.8	0.00222064
		500.15	0.00219792
		500.5	0.00217356
		500.85	0.00214849
		501.2	0.0021236
		501.55	0.00209972
		501.9	0.00207752
		502.25	0.00205745
		502.6	0.00203977
		502.95	0.00202448
		503.3	0.0020114
		503.65	0.00200022
		504	0.00199051
		504.35	0.00198182
		504.7	0.00197374
		505.05	0.00196595
		505.4	0.00195823
		505.75	0.00195049
		506.1	0.00194276
		506.45	0.00193519
		506.8	0.00192794
		507.15	0.00192124
		507.5	0.00191527
		507.85	0.00191017
		508.2	0.00190603
		508.55	0.00190284
		508.9	0.00190052
		509.25	0.00189896
		509.6	0.00189797
		509.95	0.00189737
		510.3	0.00189698
		510.65	0.00189663
		511	0.00189619
		511.35	0.00189558
		511.7	0.00189476
		512.05	0.00189374
		512.4	0.00189257
		512.75	0.00189128
		513.1	0.00188996
		513.45	0.00188865
		513.8	0.00188733
		514.15	0.00188594
		514.5	0.00188431
		514.85	0.00188217
		515.2	0.00187914
		515.55	0.00187475
		515.9	0.00186846
		516.25	0.00185969
		516.6	0.00184796
		516.95	0.00183288
		517.3	0.00181426
		517.65	0.00179222
		518	0.00176714
		518.35	0.00173972
		518.7	0.00171093
		519.05	0.0016819
		519.4	0.00165383
		519.75	0.0016278
		520.1	0.00160468
		520.45	0.00158496
		520.8	0.00156878
		521.15	0.00155587
		521.5	0.00154565
		521.85	0.00153739
		522.2	0.00153032
		522.55	0.0015238
		522.9	0.00151745
		523.25	0.00151121
		523.6	0.00150529
		523.95	0.00150015
		524.3	0.00149635
		524.65	0.00149443
		525	0.00149479
		525.35	0.00149762
		525.7	0.00150285
		526.05	0.0015102
		526.4	0.00151918
		526.75	0.00152921
		527.1	0.00153966
		527.45	0.00154997
		527.8	0.00155967
		528.15	0.00156839
		528.5	0.00157591
		528.85	0.00158211
		529.2	0.00158697
		529.55	0.00159052
		529.9	0.00159284
		530.25	0.00159401
		530.6	0.00159413
		530.95	0.00159329
		531.3	0.00159157
		531.65	0.00158909
		532	0.00158597
		532.35	0.00158237
		532.7	0.00157849
		533.05	0.00157458
		533.4	0.00157093
		533.75	0.00156786
		534.1	0.00156574
		534.45	0.00156492
		534.8	0.00156574
		535.15	0.00156846
		535.5	0.00157328
		535.85	0.00158025
		536.2	0.0015893
		536.55	0.00160014
		536.9	0.00161234
		537.25	0.00162525
		537.6	0.0016381
		537.95	0.00164999
		538.3	0.00165995
		538.65	0.00166705
		539	0.00167042
		539.35	0.00166934
		539.7	0.00166335
		540.05	0.00165222
		540.4	0.00163608
		540.75	0.00161537
		541.1	0.00159086
		541.45	0.00156364
		541.8	0.00153497
		542.15	0.00150629
		542.5	0.00147899
		542.85	0.00145426
		543.2	0.00143295
		543.55	0.00141539
		543.9	0.00140125
		544.25	0.00138956
		544.6	0.0013788
		544.95	0.00136707
		545.3	0.00135242
		545.65	0.00133312
		546	0.00130796
		546.35	0.00127648
		546.7	0.00123893
		547.05	0.00119629
		547.4	0.00114994
		547.75	0.00110148
		548.1	0.0010524
		548.45	0.00100387
		548.8	0.000956664
		549.15	0.00091109
		549.5	0.000867097
		549.85	0.000824391
		550.2	0.000782576
		550.55	0.000741274
		550.9	0.000700221
		551.25	0.000659311
		551.6	0.000618601
		551.95	0.000578284
		552.3	0.000538657
		552.65	0.000500068
		553	0.000462869
		553.35	0.000427385
		553.7	0.000393882
		554.05	0.000362555
		554.4	0.000333524
		554.75	0.000306828
		555.1	0.000282442
		555.45	0.000260281
		555.8	0.000240219
		556.15	0.000222097
		556.5	0.00020574
		556.85	0.000190966
		557.2	0.000177599
		557.55	0.000165472
		557.9	0.000154429
		558.25	0.000144332
		558.6	0.00013506
		558.95	0.000126514
		559.3	0.000118604
		559.65	0.000111258
		560	0.000104416
		560.35	9.80277e-05
		560.7	9.20544e-05
		561.05	8.64597e-05
		561.4	8.12146e-05
		561.75	7.62944e-05
		562.1	7.16778e-05
		562.45	6.73448e-05
		562.8	6.32806e-05
		563.15	5.94674e-05
		563.5	5.58929e-05
		563.85	5.25418e-05
		564.2	4.94024e-05
		564.55	4.64633e-05
		564.9	4.37107e-05
		565.25	4.11349e-05
		565.6	3.87265e-05
		565.95	3.64741e-05
		566.3	3.43681e-05
		566.65	3.23994e-05
		567	3.05572e-05
		567.35	2.88366e-05
		567.7	2.72296e-05
		568.05	2.57255e-05
		568.4	2.4321e-05
		568.75	2.30088e-05
		569.1	2.17816e-05
		569.45	2.06325e-05
		569.8	1.95585e-05
		570.15	1.85531e-05
		570.5	1.76115e-05
		570.85	1.67295e-05
		571.2	1.59006e-05
		571.55	1.51247e-05
		571.9	1.43976e-05
		572.25	1.3715e-05
		572.6	1.30736e-05
		572.95	1.24708e-05
		573.3	1.19037e-05
		573.65	1.137e-05
		574	1.08672e-05
		574.35	1.03934e-05
		574.7	9.9465e-06
		575.05	9.52466e-06
		575.4	9.12621e-06
		575.75	8.74955e-06
		576.1	8.39321e-06
		576.45	8.05584e-06
		576.8	7.73617e-06
		577.15	7.43302e-06
		577.5	7.14531e-06
		577.85	6.87097e-06
		578.2	6.61138e-06
		578.55	6.36435e-06
		578.9	6.12908e-06
		579.25	5.90483e-06
		579.6	5.68985e-06
		579.95	5.48584e-06
		580.3	5.29085e-06
		580.65	5.10435e-06
		581	4.92581e-06
		581.35	4.75478e-06
		581.7	4.58974e-06
		582.05	4.4326e-06
		582.4	4.2817e-06
		582.75	4.13669e-06
		583.1	3.99622e-06
		583.45	3.86225e-06
		583.8	3.73323e-06
		584.15	3.60891e-06
		584.5	3.48904e-06
		584.85	3.37341e-06
		585.2	3.26181e-06
		585.55	3.15405e-06
		585.9	3.04995e-06
		586.25	2.94935e-06
		586.6	2.85105e-06
		586.95	2.75712e-06
		587.3	2.66623e-06
		587.65	2.57825e-06
		588	2.49308e-06
		588.35	2.41059e-06
		588.7	2.3307e-06
		589.05	2.25329e-06
		589.4	2.17829e-06
		589.75	2.10561e-06
		590.1	2.03516e-06
		590.45	1.96687e-06
		590.8	1.90068e-06
		591.15	1.8365e-06
		591.5	1.77428e-06
		591.85	1.71396e-06
		592.2	1.65547e-06
		592.55	1.59877e-06
		592.9	1.54379e-06
		593.25	1.49049e-06
		593.6	1.43882e-06
		593.95	1.38768e-06
		594.3	1.33929e-06
		594.65	1.29237e-06
		595	1.24687e-06
		595.35	1.20278e-06
		595.7	1.16003e-06
		596.05	1.11861e-06
		596.4	1.07847e-06
		596.75	1.03959e-06
		597.1	1.00192e-06
		597.45	9.65441e-07
		597.8	9.30117e-07
		598.15	8.95918e-07
		598.5	8.62814e-07
		598.85	8.30775e-07
		599.2	7.99773e-07
		599.55	7.69779e-07
		599.9	7.40766e-07
		600.25	7.12708e-07
		600.6	6.85578e-07
		600.95	6.59351e-07
		601.3	6.34001e-07
		601.65	6.09504e-07
		602	5.85836e-07
		602.35	5.62973e-07
		602.7	5.39829e-07
		603.05	5.1862e-07
		603.4	4.98139e-07
		603.75	4.78365e-07
		604.1	4.59278e-07
		604.45	4.40858e-07
		604.8	4.23087e-07
		605.15	4.05946e-07
		605.5	3.89415e-07
		605.85	3.73477e-07
		606.2	3.58115e-07
		606.55	3.42242e-07
		606.9	3.28071e-07
		607.25	3.14417e-07
		607.6	3.01264e-07
		607.95	2.88598e-07
		608.3	2.76403e-07
		608.65	2.64664e-07
		609	2.53368e-07
		609.35	2.425e-07
		609.7	2.32046e-07
		610.05	2.21995e-07
		610.4	2.12331e-07
		610.75	2.03043e-07
		611.1	1.94118e-07
		611.45	1.85545e-07
		611.8	1.7731e-07
		612.15	1.69404e-07
		612.5	1.61814e-07
		612.85	1.5453e-07
		613.2	1.47541e-07
		613.55	1.40837e-07
		613.9	1.34408e-07
		614.25	1.28244e-07
		614.6	1.22335e-07
		614.95	1.16673e-07
		615.3	1.11248e-07
		615.65	1.06052e-07
		616	1.01076e-07
		616.35	9.63123e-08
		616.7	9.17527e-08
		617.05	8.73896e-08
		617.4	8.32154e-08
		617.75	7.92231e-08
		618.1	7.54056e-08
		618.45	7.17561e-08
		618.8	6.82681e-08
		619.15	6.49353e-08
		619.5	6.17514e-08
		619.85	5.87107e-08
		620.2	5.58072e-08
		620.55	5.30357e-08
		620.9	5.03905e-08
		621.25	4.78667e-08
		621.6	4.54592e-08
		621.95	4.31632e-08
		622.3	4.09741e-08
		622.65	3.88874e-08
		623	3.68988e-08
		623.35	3.50041e-08
		623.7	3.31993e-08
		624.05	3.14806e-08
		624.4	2.98442e-08
		624.75	2.82867e-08
		625.1	2.68044e-08
		625.45	2.53942e-08
		625.8	2.40529e-08
		626.15	2.27774e-08
		626.5	2.15647e-08
		626.85	2.0412e-08
		627.2	1.93167e-08
		627.55	1.82761e-08
		627.9	1.72877e-08
		628.25	1.63492e-08
		628.6	1.54582e-08
		628.95	1.46125e-08
		629.3	1.381e-08
		629.65	1.30486e-08
		630	1.23265e-08
		630.35	1.16418e-08
		630.7	1.09927e-08
		631.05	1.03775e-08
		631.4	9.79451e-09
		631.75	9.24224e-09
		632.1	8.71918e-09
		632.45	8.2239e-09
		632.8	7.75502e-09
		633.15	7.31126e-09
		633.5	6.89137e-09
		633.85	6.49414e-09
		634.2	6.11846e-09
		634.55	5.76323e-09
		634.9	5.42742e-09
		635.25	5.11005e-09
		635.6	4.81016e-09
		635.95	4.52687e-09
		636.3	4.25932e-09
		636.65	4.0067e-09
		637	3.76822e-09
		637.35	3.54315e-09
		637.7	3.33078e-09
		638.05	3.13045e-09
		638.4	2.94152e-09
		638.75	2.76337e-09
		639.1	2.59544e-09
		639.45	2.43717e-09
		639.8	2.28805e-09
		640.15	2.14757e-09
		640.5	2.01527e-09
		640.85	1.8907e-09
		641.2	1.77344e-09
		641.55	1.66308e-09
		641.9	1.55925e-09
		642.25	1.46157e-09
		642.6	1.36971e-09
		642.95	1.28333e-09
		643.3	1.20214e-09
		643.65	1.12583e-09
		644	0
		644.35	0
		644.7	0
		645.05	0
		645.4	0
		645.75	0
		646.1	0
		646.45	0
		646.8	0
		647.15	0
		647.5	0
		647.85	0
		648.2	0
		648.55	0
		648.9	0
		649.25	0
		649.6	0
		649.95	0
		650.3	0
		650.65	0
		651	0
		651.35	0
		651.7	0
		652.05	0
		652.4	0
		652.75	0
		653.1	0
		653.45	0
		653.8	0
		654.15	0
		654.5	0
		654.85	0
		655.2	0
		655.55	0
		655.9	0
		656.25	0
		656.6	0
		656.95	0
		657.3	0
		657.65	0
		658	0
		658.35	0
		658.7	0
		659.05	0
		659.4	0
		659.75	0
		660.1	0
		660.45	0
		660.8	0
		661.15	0
		661.5	0
		661.85	0
		662.2	0
		662.55	0
		662.9	0
		663.25	0
		663.6	0
		663.95	0
		664.3	0
		664.65	0
		665	0
		665.35	0
		665.7	0
		666.05	0
		666.4	0
		666.75	0
		667.1	0
		667.45	0
		667.8	0
		668.15	0
		668.5	0
		668.85	0
		669.2	0
		669.55	0
		669.9	0
		670.25	0
		670.6	0
		670.95	0
		671.3	0
		671.65	0
		672	0
		672.35	0
		672.7	0
		673.05	0
		673.4	0
		673.75	0
		674.1	0
		674.45	0
		674.8	0
		675.15	0
		675.5	0
		675.85	0
		676.2	0
		676.55	0
		676.9	0
		677.25	0
		677.6	0
		677.95	0
		678.3	0
		678.65	0
		679	0
		679.35	0
		679.7	0
		680.05	0
		680.4	0
		680.75	0
		681.1	0
		681.45	0
		681.8	0
		682.15	0
		682.5	0
		682.85	0
		683.2	0
		683.55	0
		683.9	0
		684.25	0
		684.6	0
		684.95	0
		685.3	0
		685.65	0
		686	0
		686.35	0
		686.7	0
		687.05	0
		687.4	0
		687.75	0
		688.1	0
		688.45	0
		688.8	0
		689.15	0
		689.5	0
		689.85	0
		690.2	0
		690.55	0
		690.9	0
		691.25	0
		691.6	0
		691.95	0
		692.3	0
		692.65	0
		693	0
		693.35	0
		693.7	0
		694.05	0
		694.4	0
		694.75	0
		695.1	0
		695.45	0
		695.8	0
		696.15	0
		696.5	0
		696.85	0
		697.2	0
		697.55	0
		697.9	0
		698.25	0
		698.6	0
		698.95	0
		699.3	0
		699.65	0
[truncated: 1 more rows]

## Sheet: PlotDat4
Source sheet	Sheet3	0	0
Plot name	ProbDens3	0.35	0
Plot Type	16	0.7	0
1st free col	5	1.05	0
Sigma Level	2	1.4	0
Absolute Errs	TRUE	1.75	0
Symbol Type	1	2.1	0
Inverse Plot	FALSE	2.45	0
Color Plot	TRUE	2.8	0
3D plot	FALSE	3.15	0
Linear	FALSE	3.5	4.02066e-07
Data Range	A1:B1215	3.85	0.000232059
Filled Symbols	TRUE	4.2	0.00193212
ConcAge	FALSE	4.55	0.000232081
ConcSwap	FALSE	4.9	6.14406e-07
1st Symbol-row	1	5.25	0.00112868
		5.6	0.000515896
		5.95	0.000137003
		6.3	0.00200328
		6.65	0.00312339
		7	0.00318786
		7.35	0.00382568
		7.7	0.00752882
		8.05	0.00776339
		8.4	0.00792742
		8.75	0.00918545
		9.1	0.00872855
		9.45	0.00873841
		9.8	0.0080977
		10.15	0.00664204
		10.5	0.00747824
		10.85	0.00530152
		11.2	0.00463317
		11.55	0.00552271
		11.9	0.00466458
		12.25	0.00256642
		12.6	0.00243732
		12.95	0.0049283
		13.3	0.00633172
		13.65	0.00818945
		14	0.00962903
		14.35	0.00812816
		14.7	0.00988746
		15.05	0.0124541
		15.4	0.0131497
		15.75	0.0152121
		16.1	0.0111245
		16.45	0.00728295
		16.8	0.00578617
		17.15	0.00493281
		17.5	0.00386206
		17.85	0.00244461
		18.2	0.00184288
		18.55	0.00251061
		18.9	0.00386114
		19.25	0.00510845
		19.6	0.00721089
		19.95	0.0096789
		20.3	0.0100935
		20.65	0.00876691
		21	0.00678521
		21.35	0.00710528
		21.7	0.00792347
		22.05	0.00713854
		22.4	0.00610744
		22.75	0.00567823
		23.1	0.00483127
		23.45	0.00425701
		23.8	0.00470696
		24.15	0.00567725
		24.5	0.00734507
		24.85	0.00523394
		25.2	0.00338725
		25.55	0.00272628
		25.9	0.0031132
		26.25	0.0036494
		26.6	0.00347161
		26.95	0.00277898
		27.3	0.00196093
		27.65	0.00140748
		28	0.0014434
		28.35	0.00205784
		28.7	0.00276826
		29.05	0.00306193
		29.4	0.003065
		29.75	0.00267015
		30.1	0.00194637
		30.45	0.00139536
		30.8	0.000911678
		31.15	0.000499242
		31.5	0.000329221
		31.85	0.000405665
		32.2	0.000647561
		32.55	0.000991943
		32.9	0.00140305
		33.25	0.00180656
		33.6	0.00207071
		33.95	0.00216351
		34.3	0.00221936
		34.65	0.00235673
		35	0.00257027
		35.35	0.002857
		35.7	0.00340237
		36.05	0.00414017
		36.4	0.00433749
		36.75	0.0042286
		37.1	0.0043734
		37.45	0.00446833
		37.8	0.0042731
		38.15	0.0039075
		38.5	0.00360589
		38.85	0.00348839
		39.2	0.0035127
		39.55	0.00355214
		39.9	0.00348779
		40.25	0.00327497
		40.6	0.00294951
		40.95	0.00259228
		41.3	0.00229843
		41.65	0.0021237
		42	0.00203542
		42.35	0.00196102
		42.7	0.00189658
		43.05	0.00192242
		43.4	0.00208366
		43.75	0.00228928
		44.1	0.00236666
		44.45	0.00220697
		44.8	0.00184365
		45.15	0.00140987
		45.5	0.00105479
		45.85	0.000900536
		46.2	0.000983025
		46.55	0.00112751
		46.9	0.00106082
		47.25	0.0007844
		47.6	0.000531938
		47.95	0.000409259
		48.3	0.000368438
		48.65	0.000363701
		49	0.000390493
		49.35	0.000459139
		49.7	0.00057379
		50.05	0.000721423
		50.4	0.000871674
		50.75	0.00099254
		51.1	0.00108085
		51.45	0.00118587
		51.8	0.001367
		52.15	0.0015782
		52.5	0.00166836
		52.85	0.00158919
		53.2	0.00147324
		53.55	0.00144229
		53.9	0.00149611
		54.25	0.00159026
		54.6	0.00170262
		54.95	0.00182647
		55.3	0.00195291
		55.65	0.00206982
		56	0.00215436
		56.35	0.00217502
		56.7	0.00215181
		57.05	0.00225586
		57.4	0.00347369
		57.75	0.00362534
		58.1	0.00275635
		58.45	0.0027154
		58.8	0.00262902
		59.15	0.00248082
		59.5	0.00231252
		59.85	0.00215818
		60.2	0.00203838
		60.55	0.00195823
		60.9	0.00191832
		61.25	0.00193191
		61.6	0.00203608
		61.95	0.00227637
		62.3	0.00264698
		62.65	0.0030452
		63	0.00335526
		63.35	0.00359243
		63.7	0.00387054
		64.05	0.00421099
		64.4	0.00448609
		64.75	0.00459612
		65.1	0.00467617
		65.45	0.00503962
		65.8	0.00544518
		66.15	0.00518801
		66.5	0.00458546
		66.85	0.00407993
		67.2	0.00358964
		67.55	0.00310252
		67.9	0.00269616
		68.25	0.00249483
		68.6	0.00271336
		68.95	0.00306007
		69.3	0.00283713
		69.65	0.00237766
		70	0.0020084
		70.35	0.00161646
		70.7	0.0012722
		71.05	0.00105596
		71.4	0.000933877
		71.75	0.000843441
		72.1	0.000749238
		72.45	0.000642965
		72.8	0.000532097
		73.15	0.000430454
		73.5	0.000350502
		73.85	0.000298501
		74.2	0.000273444
		74.55	0.000268982
		74.9	0.000276391
		75.25	0.000287101
		75.6	0.000294221
		75.95	0.000293264
		76.3	0.000282334
		76.65	0.000261934
		77	0.000234419
		77.35	0.000203184
		77.7	0.000171787
		78.05	0.000143214
		78.4	0.000119442
		78.75	0.000101367
		79.1	8.89935e-05
		79.45	8.17695e-05
		79.8	7.89331e-05
		80.15	7.97697e-05
		80.5	8.37544e-05
		80.85	9.0599e-05
		81.2	0.000100262
		81.55	0.000113012
		81.9	0.000129637
		82.25	0.00015192
		82.6	0.000183301
		82.95	0.000229305
		83.3	0.000296869
		83.65	0.000391779
		84	0.000514538
		84.35	0.000656897
		84.7	0.000802293
		85.05	0.0009316
		85.4	0.00103161
		85.75	0.00110099
		86.1	0.00114994
		86.45	0.00119458
		86.8	0.00125054
		87.15	0.0013295
		87.5	0.0014394
		87.85	0.00158639
		88.2	0.00177662
		88.55	0.00201634
		88.9	0.00230999
		89.25	0.00265611
		89.6	0.00304235
		89.95	0.00344386
		90.3	0.00383256
		90.65	0.00420295
		91	0.00459202
		91.35	0.00502618
		91.7	0.00539884
		92.05	0.00546825
		92.4	0.00508836
		92.75	0.00440462
		93.1	0.00371491
		93.45	0.0031962
		93.8	0.00286113
		94.15	0.00267512
		94.5	0.00261253
		94.85	0.00264701
		95.2	0.00274321
		95.55	0.00286256
		95.9	0.00297342
		96.25	0.00306236
		96.6	0.00315621
		96.95	0.00334254
		97.3	0.00365222
		97.65	0.00384874
		98	0.00369398
		98.35	0.00337195
		98.7	0.00314599
		99.05	0.00300826
		99.4	0.0028623
		99.75	0.00267344
		100.1	0.00245306
		100.45	0.00222639
		100.8	0.00201682
		101.15	0.00183873
		101.5	0.00169531
		101.85	0.00157967
		102.2	0.0014789
		102.55	0.00138162
		102.9	0.00128693
		103.25	0.00120968
		103.6	0.00117542
		103.95	0.00120163
		104.3	0.00127492
		104.65	0.0013505
		105	0.00140357
		105.35	0.00152398
		105.7	0.00184059
		106.05	0.00213597
		106.4	0.00211187
		106.75	0.00206351
		107.1	0.00226274
		107.45	0.00251422
		107.8	0.00263503
		108.15	0.00268819
		108.5	0.00281507
		108.85	0.00304799
		109.2	0.00333096
		109.55	0.00365367
		109.9	0.00399925
		110.25	0.00418035
		110.6	0.00411872
		110.95	0.00412587
		111.3	0.0044526
		111.65	0.00480091
		112	0.00457133
		112.35	0.00373179
		112.7	0.00280268
		113.05	0.00207472
		113.4	0.0015593
		113.75	0.00123045
		114.1	0.00105261
		114.45	0.000969379
		114.8	0.000922372
		115.15	0.000873467
		115.5	0.000812931
		115.85	0.00075055
		116.2	0.00069844
		116.55	0.000658597
		116.9	0.000622138
		117.25	0.000577045
		117.6	0.000516417
		117.95	0.000441747
		118.3	0.000360906
		118.65	0.000283631
		119	0.000217513
		119.35	0.000166132
		119.7	0.000129349
		120.05	0.000104814
		120.4	8.96595e-05
		120.75	8.17165e-05
		121.1	8.01575e-05
		121.45	8.56902e-05
		121.8	0.000100565
		122.15	0.000128417
		122.5	0.000173689
		122.85	0.00024003
		123.2	0.000327217
		123.55	0.00042732
		123.9	0.000522767
		124.25	0.000589588
		124.6	0.000606492
		124.95	0.000565406
		125.3	0.000476382
		125.65	0.000362966
		126	0.000251126
		126.35	0.000159112
		126.7	9.36353e-05
		127.05	5.23039e-05
		127.4	2.86073e-05
		127.75	1.59398e-05
		128.1	9.42491e-06
		128.45	6.07777e-06
		128.8	4.28736e-06
		129.15	3.25646e-06
		129.5	2.61438e-06
		129.85	2.20192e-06
		130.2	1.95676e-06
		130.55	1.86366e-06
		130.9	1.93266e-06
		131.25	2.19296e-06
		131.6	2.68618e-06
		131.95	3.47017e-06
		132.3	4.61818e-06
		132.65	6.22327e-06
		133	8.39239e-06
		133.35	1.12469e-05
		133.7	1.49266e-05
		134.05	1.95866e-05
		134.4	2.53967e-05
		134.75	3.25424e-05
		135.1	4.1231e-05
		135.45	5.16987e-05
		135.8	6.42149e-05
		136.15	7.91053e-05
		136.5	9.67769e-05
		136.85	0.000117808
		137.2	0.000143127
		137.55	0.000174322
		137.9	0.000214041
		138.25	0.000266333
		138.6	0.000336946
		138.95	0.000433803
		139.3	0.000567081
		139.65	0.00074474
		140	0.000958329
		140.35	0.00116647
		140.7	0.00130236
		141.05	0.00131839
		141.4	0.00123027
		141.75	0.00110851
		142.1	0.00102499
		142.45	0.00101283
		142.8	0.00106896
		143.15	0.00117706
		143.5	0.00132253
		143.85	0.00149526
		144.2	0.00168886
		144.55	0.0019025
		144.9	0.00214388
		145.25	0.00242682
		145.6	0.00275798
		145.95	0.00312002
		146.3	0.0034725
		146.65	0.00378119
		147	0.00404754
		147.35	0.00429006
		147.7	0.0044875
		148.05	0.00457427
		148.4	0.0045295
		148.75	0.00444861
		149.1	0.00446909
		149.45	0.00458105
		149.8	0.00457959
		150.15	0.00434717
		150.5	0.00404271
		150.85	0.00384962
		151.2	0.00375532
		151.55	0.00364974
		151.9	0.00347366
		152.25	0.00324885
		152.6	0.00302232
		152.95	0.00280758
		153.3	0.00259035
		153.65	0.0023732
		154	0.0021834
		154.35	0.00203855
		154.7	0.00192826
		155.05	0.00183345
		155.4	0.00174936
		155.75	0.00168597
		156.1	0.00165473
		156.45	0.00166132
		156.8	0.00171338
		157.15	0.00183606
		157.5	0.00205994
		157.85	0.00234978
		158.2	0.00256583
		158.55	0.0025943
		158.9	0.00249424
		159.25	0.0024113
		159.6	0.00240943
		159.95	0.00246412
		160.3	0.002543
		160.65	0.00263967
		161	0.00276377
		161.35	0.00292445
		161.7	0.00311921
		162.05	0.00333177
		162.4	0.00354119
		162.75	0.00373571
		163.1	0.00392057
		163.45	0.00411639
		163.8	0.00435436
		164.15	0.00466672
		164.5	0.00505698
		164.85	0.00545711
		165.2	0.00572984
		165.55	0.00575664
		165.9	0.00554093
		166.25	0.00521212
		166.6	0.00492933
		166.95	0.00478713
		167.3	0.0047861
		167.65	0.00485133
		168	0.00487208
		168.35	0.00475571
		168.7	0.00447916
		169.05	0.00410077
		169.4	0.00371871
		169.75	0.00341297
		170.1	0.00321753
		170.45	0.0031255
		170.8	0.00310163
		171.15	0.00309544
		171.5	0.00306603
		171.85	0.00300742
		172.2	0.00294586
		172.55	0.00290869
		172.9	0.00289791
		173.25	0.00289152
		173.6	0.0028623
		173.95	0.00279396
		174.3	0.00268617
		174.65	0.00255025
		175	0.0024001
		175.35	0.00224418
		175.7	0.00208375
		176.05	0.00191787
		176.4	0.00174973
		176.75	0.0015881
		177.1	0.0014432
		177.45	0.00132138
		177.8	0.00122306
		178.15	0.00114455
		178.5	0.00108122
		178.85	0.00102961
		179.2	0.000987754
		179.55	0.000954531
		179.9	0.000928914
		180.25	0.000909563
		180.6	0.000894808
		180.95	0.000882803
		181.3	0.00087175
		181.65	0.000860071
		182	0.000846521
		182.35	0.000830257
		182.7	0.000810833
		183.05	0.000788184
		183.4	0.000762573
		183.75	0.000734515
		184.1	0.000704683
		184.45	0.000673816
		184.8	0.000642623
		185.15	0.000611707
		185.5	0.00058151
		185.85	0.000552298
		186.2	0.000524166
		186.55	0.000497069
		186.9	0.000470872
		187.25	0.000445401
		187.6	0.000420491
		187.95	0.000396021
		188.3	0.000371939
		188.65	0.000348266
		189	0.000325088
		189.35	0.00030254
		189.7	0.000280788
		190.05	0.000260002
		190.4	0.000240342
		190.75	0.000221937
		191.1	0.000204885
		191.45	0.000189247
		191.8	0.000175052
		192.15	0.000162303
		192.5	0.000150988
		192.85	0.000141094
		193.2	0.000132609
		193.55	0.000125546
		193.9	0.000119934
		194.25	0.000115834
		194.6	0.00011333
		194.95	0.000112533
		195.3	0.000113565
		195.65	0.000116549
		196	0.000121589
		196.35	0.000128754
		196.7	0.000138048
		197.05	0.000149394
		197.4	0.000162615
		197.75	0.000177419
		198.1	0.000193395
		198.45	0.000210021
		198.8	0.000226685
		199.15	0.000242712
		199.5	0.000257413
		199.85	0.000270127
		200.2	0.00028028
		200.55	0.000287438
		200.9	0.000291349
		201.25	0.000291987
		201.6	0.000289571
		201.95	0.000284578
		202.3	0.000277745
		202.65	0.000270038
		203	0.000262649
		203.35	0.000256958
		203.7	0.000254522
		204.05	0.000257053
		204.4	0.000266398
		204.75	0.000284473
		205.1	0.000313116
		205.45	0.000353792
		205.8	0.000407171
		206.15	0.000472614
		206.5	0.000547742
		206.85	0.000628336
		207.2	0.000708759
		207.55	0.000782921
		207.9	0.000845603
		208.25	0.000893669
		208.6	0.000926718
		208.95	0.000946886
		209.3	0.000957896
		209.65	0.000963751
		210	0.000967617
		210.35	0.000971247
		210.7	0.000974985
		211.05	0.000978092
		211.4	0.000979082
		211.75	0.00097593
		212.1	0.000966268
		212.45	0.000947823
		212.8	0.000919209
		213.15	0.000880882
		213.5	0.000835824
		213.85	0.000789492
		214.2	0.000748869
		214.55	0.000720845
		214.9	0.000710444
		215.25	0.000719464
		215.6	0.000745935
		215.95	0.000784532
		216.3	0.000827867
		216.65	0.000868431
		217	0.000900948
		217.35	0.000924843
		217.7	0.000946222
		218.05	0.000977835
		218.4	0.00103461
		218.75	0.0011239
		219.1	0.00123529
		219.45	0.00133973
		219.8	0.00140373
		220.15	0.00140985
		220.5	0.00136597
		220.85	0.00129576
		221.2	0.00122078
		221.55	0.00115069
		221.9	0.00108579
		222.25	0.00102478
		222.6	0.000969399
		222.95	0.000924296
		223.3	0.00089464
		223.65	0.000884148
		224	0.000894548
		224.35	0.000926238
		224.7	0.000979523
		225.05	0.00105553
		225.4	0.00115563
		225.75	0.00127851
		226.1	0.00141562
		226.45	0.0015487
		226.8	0.0016534
		227.15	0.00170964
		227.5	0.00171266
		227.85	0.00167664
		228.2	0.00162771
		228.55	0.00159181
		228.9	0.00158552
		229.25	0.00161409
		229.6	0.00167443
		229.95	0.00175891
		230.3	0.00185743
		230.65	0.00195847
		231	0.00205029
		231.35	0.00212307
		231.7	0.00217139
		232.05	0.00219574
		232.4	0.00220217
		232.75	0.00219991
		233.1	0.00219779
		233.45	0.00220088
		233.8	0.0022088
		234.15	0.00221623
		234.5	0.00221554
		234.85	0.00220039
		235.2	0.00216886
		235.55	0.0021248
		235.9	0.00207708
		236.25	0.00203727
		236.6	0.00201686
		236.95	0.00202509
		237.3	0.00206788
		237.65	0.00214767
		238	0.00226369
		238.35	0.00241237
		238.7	0.00258748
		239.05	0.00278029
		239.4	0.00297977
		239.75	0.0031731
		240.1	0.00334728
		240.45	0.00349267
		240.8	0.0036092
		241.15	0.00371129
		241.5	0.00382007
		241.85	0.00393661
		242.2	0.00402017
		242.55	0.00401242
		242.9	0.00389672
		243.25	0.00371967
		243.6	0.00354626
		243.95	0.00340931
		244.3	0.00330714
		244.65	0.00322983
		245	0.00317458
		245.35	0.00314356
		245.7	0.00313776
		246.05	0.00315507
		246.4	0.00319183
		246.75	0.00324493
		247.1	0.0033126
		247.45	0.00339402
		247.8	0.00348836
		248.15	0.00359389
		248.5	0.00370749
		248.85	0.00382463
		249.2	0.00393966
		249.55	0.00404642
		249.9	0.00413892
		250.25	0.00421207
		250.6	0.00426225
		250.95	0.00428767
		251.3	0.00428854
		251.65	0.00426686
		252	0.00422596
		252.35	0.00416994
		252.7	0.00410297
		253.05	0.00402876
		253.4	0.00395016
		253.75	0.00386905
		254.1	0.0037865
		254.45	0.00370302
		254.8	0.00361904
		255.15	0.00353519
		255.5	0.00345258
		255.85	0.00337285
		256.2	0.00329821
		256.55	0.00323139
		256.9	0.00317556
		257.25	0.00313415
		257.6	0.0031104
		257.95	0.00310648
		258.3	0.00312239
		258.65	0.00315508
		259	0.00319837
		259.35	0.00324394
		259.7	0.0032835
		260.05	0.00331098
		260.4	0.00332416
		260.75	0.00332475
		261.1	0.00331727
		261.45	0.00330726
		261.8	0.00329969
		262.15	0.00329808
		262.5	0.00330435
		262.85	0.00331921
		263.2	0.00334263
		263.55	0.00337434
		263.9	0.003414
		264.25	0.00346135
		264.6	0.00351607
		264.95	0.00357753
		265.3	0.00364451
		265.65	0.00371507
		266	0.00378682
		266.35	0.00385758
		266.7	0.00392614
		267.05	0.00399296
		267.4	0.00406126
		267.75	0.00413879
		268.1	0.00423492
		268.45	0.00434231
		268.8	0.00441118
		269.15	0.00436079
		269.5	0.00414888
		269.85	0.00382688
		270.2	0.00350292
		270.55	0.00325744
		270.9	0.00310894
		271.25	0.00303964
		271.6	0.00302679
		271.95	0.0030526
		272.3	0.00310234
		272.65	0.00316304
		273	0.00322543
		273.35	0.00328666
		273.7	0.0033513
		274.05	0.00342887
		274.4	0.00352874
		274.75	0.00365397
		275.1	0.00379727
		275.45	0.00394063
		275.8	0.00405919
		276.15	0.00412787
		276.5	0.00412858
		276.85	0.00405561
		277.2	0.00391777
		277.55	0.00373608
		277.9	0.00353761
		278.25	0.00334702
		278.6	0.00317923
		278.95	0.00303654
		279.3	0.00291175
		279.65	0.00279573
		280	0.00268538
		280.35	0.00258771
		280.7	0.00251825
		281.05	0.00249482
		281.4	0.00253047
		281.75	0.002629
		282.1	0.00278477
		282.45	0.00298564
		282.8	0.00321591
		283.15	0.0034576
		283.5	0.0036905
		283.85	0.00389411
		284.2	0.00405248
		284.55	0.00415951
		284.9	0.00422014
		285.25	0.00424619
		285.6	0.00425004
		285.95	0.00424087
		286.3	0.00422536
		286.65	0.00421056
		287	0.00420603
		287.35	0.004224
		287.7	0.00427739
		288.05	0.0043762
		288.4	0.00452257
		288.75	0.00470597
		289.1	0.00490228
		289.45	0.00507987
		289.8	0.00521217
		290.15	0.00528957
		290.5	0.00532093
		290.85	0.00532089
		291.2	0.00529162
		291.55	0.0052158
		291.9	0.00506969
		292.25	0.00484614
		292.6	0.00456769
		292.95	0.00427961
		293.3	0.00402972
		293.65	0.00384972
		294	0.00374794
		294.35	0.00371378
		294.7	0.00372685
		295.05	0.00376395
		295.4	0.00380221
		295.75	0.00382095
		296.1	0.0038045
		296.45	0.00374528
		296.8	0.00364479
		297.15	0.00351175
		297.5	0.00335812
		297.85	0.0031955
		298.2	0.00303322
		298.55	0.00287824
		298.9	0.00273571
		299.25	0.00260962
		299.6	0.00250299
		299.95	0.0024178
		300.3	0.00235506
		300.65	0.0023151
		301	0.00229801
		301.35	0.002304
		301.7	0.00233314
		302.05	0.00238444
		302.4	0.00245422
		302.75	0.00253508
		303.1	0.00261628
		303.45	0.0026865
		303.8	0.00273779
		304.15	0.00276878
		304.5	0.00278495
		304.85	0.0027956
		305.2	0.00280896
		305.55	0.00282838
		305.9	0.00285122
		306.25	0.00287077
		306.6	0.00287956
		306.95	0.00287247
		307.3	0.00284818
		307.65	0.00280899
		308	0.00275933
		308.35	0.00270411
		308.7	0.00264731
		309.05	0.00259137
		309.4	0.00253724
		309.75	0.00248478
		310.1	0.00243332
		310.45	0.00238205
		310.8	0.00233032
		311.15	0.00227766
		311.5	0.00222386
		311.85	0.00216892
		312.2	0.00211299
		312.55	0.0020564
		312.9	0.00199961
		313.25	0.00194314
		313.6	0.00188759
		313.95	0.00183353
		314.3	0.00178145
		314.65	0.00173169
		315	0.00168438
		315.35	0.00163939
		315.7	0.00159634
		316.05	0.00155462
		316.4	0.00151348
		316.75	0.00147213
		317.1	0.0014299
		317.45	0.00138635
		317.8	0.00134142
		318.15	0.00129555
		318.5	0.00124964
		318.85	0.00120514
		319.2	0.00116384
		319.55	0.00112781
		319.9	0.00109915
		320.25	0.00107982
		320.6	0.0010714
		320.95	0.00107497
		321.3	0.00109096
		321.65	0.00111919
		322	0.00115884
		322.35	0.00120865
		322.7	0.00126703
		323.05	0.00133225
		323.4	0.00140256
		323.75	0.00147622
		324.1	0.00155153
		324.45	0.00162666
		324.8	0.0016996
		325.15	0.00176801
		325.5	0.00182928
		325.85	0.00188071
		326.2	0.00191977
		326.55	0.00194451
		326.9	0.00195403
		327.25	0.00194924
		327.6	0.00193442
		327.95	0.00191967
		328.3	0.00192151
		328.65	0.00195496
		329	0.00201513
		329.35	0.00206377
		329.7	0.00204626
		330.05	0.00193521
		330.4	0.00175662
		330.75	0.00156747
		331.1	0.00141177
		331.45	0.00130054
		331.8	0.0012234
		332.15	0.001167
		332.5	0.0011234
		332.85	0.00108948
		333.2	0.00106428
		333.55	0.00104728
		333.9	0.00103792
		334.25	0.00103544
		334.6	0.00103899
		334.95	0.00104767
		335.3	0.00106057
		335.65	0.00107691
		336	0.00109599
		336.35	0.00111725
		336.7	0.00114023
		337.05	0.00116448
		337.4	0.00118949
		337.75	0.00121458
		338.1	0.00123888
		338.45	0.00126129
		338.8	0.00128057
		339.15	0.00129551
		339.5	0.00130507
		339.85	0.00130861
		340.2	0.00130607
		340.55	0.00129795
		340.9	0.00128532
		341.25	0.00126965
		341.6	0.00125258
		341.95	0.00123563
		342.3	0.00121999
		342.65	0.00120635
		343	0.00119482
		343.35	0.00118495
		343.7	0.00117584
		344.05	0.00116634
		344.4	0.00115524
		344.75	0.00114144
		345.1	0.00112416
		345.45	0.00110302
		345.8	0.00107806
		346.15	0.00104976
		346.5	0.0010189
		346.85	0.000986475
		347.2	0.000953569
		347.55	0.000921216
		347.9	0.00089032
		348.25	0.000861594
		348.6	0.000835543
		348.95	0.000812474
		349.3	0.000792532
		349.65	0.000775741
		350	0.000762034
		350.35	0.000751296
		350.7	0.000743355
		351.05	0.00073801
		351.4	0.000735003
		351.75	0.000734021
		352.1	0.000734678
		352.45	0.000736523
		352.8	0.000739036
		353.15	0.000741659
		353.5	0.000743818
		353.85	0.00074496
		354.2	0.000744599
		354.55	0.000742349
		354.9	0.000737956
		355.25	0.000731318
		355.6	0.000722494
		355.95	0.000711687
		356.3	0.000699235
		356.65	0.00068557
		357	0.000671186
		357.35	0.000656598
		357.7	0.000642307
		358.05	0.000628767
		358.4	0.000616368
		358.75	0.000605419
		359.1	0.000596142
		359.45	0.000588685
		359.8	0.000583116
		360.15	0.000579444
		360.5	0.000577625
		360.85	0.000577578
		361.2	0.000579193
		361.55	0.000582342
		361.9	0.000586896
		362.25	0.000592727
		362.6	0.000599728
		362.95	0.000607821
		363.3	0.000616969
		363.65	0.000627167
		364	0.000638436
		364.35	0.000650795
		364.7	0.000664213
		365.05	0.000678555
		365.4	0.00069351
		365.75	0.000708542
		366.1	0.000722862
		366.45	0.000735437
		366.8	0.000745059
		367.15	0.000750459
		367.5	0.000750464
		367.85	0.000744167
		368.2	0.00073108
		368.55	0.000711229
		368.9	0.000685188
		369.25	0.00065402
		369.6	0.000619155
		369.95	0.000582221
		370.3	0.000544847
		370.65	0.000508505
		371	0.00047438
		371.35	0.000443308
		371.7	0.000415761
		372.05	0.000391888
		372.4	0.000371583
		372.75	0.00035456
		373.1	0.000340433
		373.45	0.000328774
		373.8	0.000319156
		374.15	0.000311184
		374.5	0.000304505
		374.85	0.000298812
		375.2	0.00029384
		375.55	0.000289367
		375.9	0.000285201
		376.25	0.000281188
		376.6	0.0002772
		376.95	0.000273138
		377.3	0.000268935
		377.65	0.00026455
		378	0.000259971
		378.35	0.000255213
		378.7	0.000250315
		379.05	0.000245344
		379.4	0.000240381
		379.75	0.000235529
		380.1	0.000230903
		380.45	0.000226625
		380.8	0.000222824
		381.15	0.000219623
		381.5	0.000217145
		381.85	0.000215496
		382.2	0.000214773
		382.55	0.00021505
		382.9	0.000216382
		383.25	0.0002188
		383.6	0.000222309
		383.95	0.000226884
		384.3	0.000232482
		384.65	0.000239026
		385	0.000246417
		385.35	0.000254535
		385.7	0.000263242
		386.05	0.000272382
		386.4	0.000281791
		386.75	0.000291295
		387.1	0.000300723
		387.45	0.000309898
		387.8	0.000318656
		388.15	0.000326841
		388.5	0.000334314
		388.85	0.00034095
		389.2	0.000346649
		389.55	0.000351331
		389.9	0.000354942
		390.25	0.000357453
		390.6	0.000358856
		390.95	0.000359172
		391.3	0.000358441
		391.65	0.00035673
		392	0.000354125
		392.35	0.000350738
		392.7	0.000346706
		393.05	0.000342202
		393.4	0.000337441
		393.75	0.000332691
		394.1	0.000328286
		394.45	0.000324631
		394.8	0.000322201
		395.15	0.000321519
		395.5	0.000323109
		395.85	0.000327431
		396.2	0.000334778
		396.55	0.000345187
		396.9	0.00035834
		397.25	0.000373526
		397.6	0.000389644
		397.95	0.000405305
		398.3	0.000419007
		398.65	0.000429359
		399	0.000435321
		399.35	0.0004364
		399.7	0.000432766
		400.05	0.000425246
		400.4	0.0004152
		400.75	0.000404306
		401.1	0.000394295
		401.45	0.000386697
		401.8	0.000382633
		402.15	0.000382704
		402.5	0.000386959
		402.85	0.000394965
		403.2	0.000405926
		403.55	0.000418843
		403.9	0.000432672
		404.25	0.000446472
		404.6	0.000459517
		404.95	0.000471372
		405.3	0.00048193
		405.65	0.000491403
		406	0.000500296
		406.35	0.000509339
		406.7	0.000519413
		407.05	0.000531443
		407.4	0.000546304
		407.75	0.000564703
		408.1	0.000587071
		408.45	0.000613465
		408.8	0.0006435
		409.15	0.000676314
		409.5	0.000710603
		409.85	0.000744713
		410.2	0.0007768
		410.55	0.000805032
		410.9	0.000827809
		411.25	0.000843958
		411.6	0.000852871
		411.95	0.000854554
		412.3	0.000849591
		412.65	0.000839017
		413	0.000824149
		413.35	0.000806402
		413.7	0.000787125
		414.05	0.00076748
		414.4	0.000748383
		414.75	0.000730491
		415.1	0.000714231
		415.45	0.000699844
		415.8	0.000687438
		416.15	0.000677027
		416.5	0.000668559
		416.85	0.000661936
		417.2	0.000657023
		417.55	0.000653652
		417.9	0.000651625
		418.25	0.000650726
		418.6	0.000650727
		418.95	0.000651399
		419.3	0.000652527
		419.65	0.000653915
		420	0.000655396
		420.35	0.000656835
		420.7	0.000658126
		421.05	0.0006592
		421.4	0.000660008
		421.75	0.000660529
		422.1	0.000660754
		422.45	0.00066069
		422.8	0.00066035
		423.15	0.000659749
		423.5	0.000658906
		423.85	0.000657839
		424.2	0.00065656
		424.55	0.000655076
		424.9	0.000653391
		425.25	0.0006515
		425.6	0.000649394
		425.95	0.000647057
		426.3	0.000644465
		426.65	0.000641589
		427	0.000638394
		427.35	0.000634844
		427.7	0.000630898
		428.05	0.000626519
		428.4	0.000621672
		428.75	0.000616333
		429.1	0.000610486
		429.45	0.00060413
		429.8	0.000597285
		430.15	0.000589986
		430.5	0.000582294
		430.85	0.000574291
		431.2	0.000566082
		431.55	0.000557794
		431.9	0.000549571
		432.25	0.000541572
		432.6	0.000533966
		432.95	0.000526929
		433.3	0.000520633
		433.65	0.000515248
		434	0.00051093
		434.35	0.000507821
		434.7	0.000506044
		435.05	0.000505697
		435.4	0.000506857
		435.75	0.000509574
		436.1	0.000513877
		436.45	0.000519762
		436.8	0.000527207
		437.15	0.000536169
		437.5	0.000546595
		437.85	0.000558426
		438.2	0.000571616
		438.55	0.000586157
		438.9	0.000602111
		439.25	0.000619648
		439.6	0.000639072
		439.95	0.000660832
		440.3	0.000685476
		440.65	0.000713555
		441	0.00074544
		441.35	0.000781104
		441.7	0.000819894
		442.05	0.000860387
		442.4	0.000900404
		442.75	0.000937238
		443.1	0.000968072
		443.45	0.00099053
		443.8	0.00100317
		444.15	0.00100584
		444.5	0.000999696
		444.85	0.00098695
		445.2	0.000970384
		445.55	0.000952774
		445.9	0.000936393
		446.25	0.0009227
		446.6	0.000912265
		446.95	0.000904893
		447.3	0.00089987
		447.65	0.000896232
		448	0.000893023
		448.35	0.000889463
		448.7	0.000885027
		449.05	0.000879464
		449.4	0.000872771
		449.75	0.000865134
		450.1	0.000856864
		450.45	0.000848341
		450.8	0.000839977
		451.15	0.000832193
		451.5	0.000825432
		451.85	0.000820215
		452.2	0.000817252
		452.55	0.000817544
		452.9	0.00082248
		453.25	0.000833781
		453.6	0.000853184
		453.95	0.000881866
		454.3	0.000919643
		454.65	0.000964279
		455	0.00101132
		455.35	0.00105475
		455.7	0.00108854
		456.05	0.00110844
		456.4	0.00111348
		456.75	0.00110637
		457.1	0.00109254
		457.45	0.00107838
		457.8	0.00106928
		458.15	0.00106837
		458.5	0.00107605
		458.85	0.0010906
		459.2	0.00110909
		459.55	0.00112843
		459.9	0.00114615
		460.25	0.00116081
		460.6	0.0011721
		460.95	0.00118071
		461.3	0.00118811
		461.65	0.00119613
		462	0.00120669
		462.35	0.00122147
		462.7	0.00124169
		463.05	0.00126798
		463.4	0.00130035
		463.75	0.0013382
		464.1	0.00138043
		464.45	0.00142557
		464.8	0.00147191
		465.15	0.00151761
		465.5	0.00156087
		465.85	0.00160003
		466.2	0.00163367
		466.55	0.00166067
		466.9	0.00168032
		467.25	0.00169231
		467.6	0.00169678
		467.95	0.00169424
		468.3	0.00168557
		468.65	0.00167192
		469	0.00165464
		469.35	0.00163513
		469.7	0.0016148
		470.05	0.00159493
		470.4	0.00157661
		470.75	0.00156067
		471.1	0.00154767
		471.45	0.00153787
		471.8	0.00153126
		472.15	0.00152763
		472.5	0.00152662
		472.85	0.00152778
		473.2	0.00153068
		473.55	0.00153495
		473.9	0.00154034
		474.25	0.00154673
		474.6	0.00155414
		474.95	0.00156268
		475.3	0.0015725
		475.65	0.00158373
		476	0.00159641
		476.35	0.00161043
		476.7	0.00162555
		477.05	0.00164135
		477.4	0.00165729
		477.75	0.00167279
		478.1	0.00168727
		478.45	0.00170025
		478.8	0.00171143
		479.15	0.00172069
		479.5	0.00172816
		479.85	0.00173415
		480.2	0.00173913
		480.55	0.00174364
		480.9	0.00174822
		481.25	0.00175334
		481.6	0.00175936
		481.95	0.00176644
		482.3	0.00177466
		482.65	0.00178394
		483	0.00179421
		483.35	0.00180541
		483.7	0.00181763
		484.05	0.00183114
		484.4	0.00184643
		484.75	0.00186422
		485.1	0.0018853
		485.45	0.0019105
		485.8	0.0019404
		486.15	0.0019752
		486.5	0.00201449
		486.85	0.00205715
		487.2	0.00210135
		487.55	0.00214469
		487.9	0.00218443
		488.25	0.00221782
		488.6	0.00224251
		488.95	0.00225681
		489.3	0.0022599
		489.65	0.00225184
		490	0.00223352
		490.35	0.00220641
		490.7	0.00217233
		491.05	0.00213317
		491.4	0.0020907
		491.75	0.00204651
		492.1	0.00200191
		492.45	0.00195802
		492.8	0.00191574
		493.15	0.0018759
		493.5	0.00183918
		493.85	0.00180621
		494.2	0.00177748
		494.55	0.00175335
		494.9	0.00173398
		495.25	0.00171929
		495.6	0.00170897
		495.95	0.00170247
		496.3	0.00169903
		496.65	0.00169773
		497	0.00169759
		497.35	0.00169758
		497.7	0.00169677
		498.05	0.00169434
		498.4	0.00168969
		498.75	0.00168242
		499.1	0.0016724
		499.45	0.00165973
		499.8	0.00164473
		500.15	0.0016279
		500.5	0.00160986
		500.85	0.00159128
		501.2	0.00157285
		501.55	0.00155517
		501.9	0.00153872
		502.25	0.00152386
		502.6	0.00151076
		502.95	0.00149944
		503.3	0.00148976
		503.65	0.00148147
		504	0.00147428
		504.35	0.00146784
		504.7	0.00146186
		505.05	0.00145609
		505.4	0.00145037
		505.75	0.00144464
		506.1	0.00143891
		506.45	0.0014333
		506.8	0.00142794
		507.15	0.00142297
		507.5	0.00141855
		507.85	0.00141478
		508.2	0.00141171
		508.55	0.00140934
		508.9	0.00140763
		509.25	0.00140647
		509.6	0.00140574
		509.95	0.0014053
		510.3	0.001405
		510.65	0.00140474
		511	0.00140442
		511.35	0.00140397
		511.7	0.00140336
		512.05	0.00140261
		512.4	0.00140174
		512.75	0.00140079
		513.1	0.00139981
		513.45	0.00139883
		513.8	0.00139786
		514.15	0.00139683
		514.5	0.00139562
		514.85	0.00139404
		515.2	0.0013918
		515.55	0.00138854
		515.9	0.00138388
		516.25	0.00137739
		516.6	0.0013687
		516.95	0.00135753
		517.3	0.00134374
		517.65	0.00132741
		518	0.00130884
		518.35	0.00128853
		518.7	0.00126721
		519.05	0.00124571
		519.4	0.00122492
		519.75	0.00120564
		520.1	0.00118851
		520.45	0.00117391
		520.8	0.00116192
		521.15	0.00115236
		521.5	0.0011448
		521.85	0.00113868
		522.2	0.00113344
		522.55	0.00112861
		522.9	0.00112391
		523.25	0.00111928
		523.6	0.0011149
		523.95	0.00111109
		524.3	0.00110828
		524.65	0.00110685
		525	0.00110712
		525.35	0.00110922
		525.7	0.0011131
		526.05	0.00111854
		526.4	0.00112519
		526.75	0.00113261
		527.1	0.00114036
		527.45	0.00114799
		527.8	0.00115518
		528.15	0.00116164
		528.5	0.0011672
		528.85	0.0011718
		529.2	0.0011754
		529.55	0.00117803
		529.9	0.00117974
		530.25	0.00118061
		530.6	0.0011807
		530.95	0.00118007
		531.3	0.0011788
		531.65	0.00117697
		532	0.00117466
		532.35	0.00117199
		532.7	0.00116912
		533.05	0.00116622
		533.4	0.00116351
		533.75	0.00116124
		534.1	0.00115967
		534.45	0.00115907
		534.8	0.00115967
		535.15	0.00116168
		535.5	0.00116525
		535.85	0.00117042
		536.2	0.00117712
		536.55	0.00118515
		536.9	0.00119419
		537.25	0.00120375
		537.6	0.00121327
		537.95	0.00122207
		538.3	0.00122945
		538.65	0.00123471
		539	0.0012372
		539.35	0.00123641
		539.7	0.00123196
		540.05	0.00122372
		540.4	0.00121177
		540.75	0.00119643
		541.1	0.00117828
		541.45	0.00115811
		541.8	0.00113688
		542.15	0.00111564
		542.5	0.00109542
		542.85	0.0010771
		543.2	0.00106132
		543.55	0.00104831
		543.9	0.00103784
		544.25	0.00102918
		544.6	0.00102121
		544.95	0.00101253
		545.3	0.00100167
		545.65	0.000987378
		546	0.000968748
		546.35	0.000945427
		546.7	0.000917622
		547.05	0.000886035
		547.4	0.000851709
		547.75	0.000815816
		548.1	0.000779461
		548.45	0.000743522
		548.8	0.000708557
		549.15	0.000674803
		549.5	0.000642219
		549.85	0.000610589
		550.2	0.000579618
		550.55	0.000549027
		550.9	0.000518621
		551.25	0.000488322
		551.6	0.000458169
		551.95	0.000428308
		552.3	0.000398959
		552.65	0.000370377
		553	0.000342826
		553.35	0.000316544
		553.7	0.00029173
		554.05	0.000268528
		554.4	0.000247026
		554.75	0.000227254
		555.1	0.000209191
		555.45	0.000192778
		555.8	0.000177919
		556.15	0.000164497
		556.5	0.000152382
		556.85	0.00014144
		557.2	0.00013154
		557.55	0.000122557
		557.9	0.000114378
		558.25	0.0001069
		558.6	0.000100033
		558.95	9.37032e-05
		559.3	8.78445e-05
		559.65	8.24036e-05
		560	7.73362e-05
		560.35	7.26046e-05
		560.7	6.81805e-05
		561.05	6.40367e-05
		561.4	6.01519e-05
		561.75	5.65078e-05
		562.1	5.30885e-05
		562.45	4.98792e-05
		562.8	4.68691e-05
		563.15	4.40447e-05
		563.5	4.13973e-05
		563.85	3.89153e-05
		564.2	3.65901e-05
		564.55	3.44132e-05
		564.9	3.23745e-05
		565.25	3.04667e-05
		565.6	2.8683e-05
		565.95	2.70147e-05
		566.3	2.54549e-05
		566.65	2.39967e-05
		567	2.26323e-05
		567.35	2.13579e-05
		567.7	2.01677e-05
		568.05	1.90537e-05
		568.4	1.80134e-05
		568.75	1.70415e-05
		569.1	1.61326e-05
		569.45	1.52815e-05
		569.8	1.44861e-05
		570.15	1.37414e-05
		570.5	1.30441e-05
		570.85	1.23907e-05
		571.2	1.17769e-05
		571.55	1.12022e-05
		571.9	1.06637e-05
		572.25	1.0158e-05
		572.6	9.68305e-06
		572.95	9.23653e-06
		573.3	8.81653e-06
		573.65	8.42121e-06
		574	8.04886e-06
		574.35	7.69792e-06
		574.7	7.36691e-06
		575.05	7.05448e-06
		575.4	6.75936e-06
		575.75	6.48039e-06
		576.1	6.21647e-06
		576.45	5.96659e-06
		576.8	5.72982e-06
		577.15	5.5053e-06
		577.5	5.2922e-06
		577.85	5.08901e-06
		578.2	4.89674e-06
		578.55	4.71378e-06
		578.9	4.53953e-06
		579.25	4.37344e-06
		579.6	4.21421e-06
		579.95	4.06311e-06
		580.3	3.91869e-06
		580.65	3.78055e-06
		581	3.64832e-06
		581.35	3.52165e-06
		581.7	3.39941e-06
		582.05	3.28302e-06
		582.4	3.17126e-06
		582.75	3.06386e-06
		583.1	2.95982e-06
		583.45	2.86059e-06
		583.8	2.76504e-06
		584.15	2.67295e-06
		584.5	2.58417e-06
		584.85	2.49853e-06
		585.2	2.41587e-06
		585.55	2.33606e-06
		585.9	2.25896e-06
		586.25	2.18444e-06
		586.6	2.11164e-06
		586.95	2.04207e-06
		587.3	1.97475e-06
		587.65	1.90959e-06
		588	1.84651e-06
		588.35	1.78542e-06
		588.7	1.72624e-06
		589.05	1.66891e-06
		589.4	1.61336e-06
		589.75	1.55953e-06
		590.1	1.50735e-06
		590.45	1.45677e-06
		590.8	1.40774e-06
		591.15	1.36021e-06
		591.5	1.31413e-06
		591.85	1.26945e-06
		592.2	1.22613e-06
		592.55	1.18413e-06
		592.9	1.14342e-06
		593.25	1.10394e-06
		593.6	1.06567e-06
		593.95	1.02779e-06
		594.3	9.91949e-07
		594.65	9.57196e-07
		595	9.23503e-07
		595.35	8.9084e-07
		595.7	8.59182e-07
		596.05	8.28502e-07
		596.4	7.98774e-07
		596.75	7.69974e-07
		597.1	7.42076e-07
		597.45	7.15058e-07
		597.8	6.88895e-07
		598.15	6.63566e-07
		598.5	6.39047e-07
		598.85	6.15317e-07
		599.2	5.92355e-07
		599.55	5.7014e-07
		599.9	5.48652e-07
		600.25	5.2787e-07
		600.6	5.07776e-07
		600.95	4.88351e-07
		601.3	4.69575e-07
		601.65	4.51431e-07
		602	4.33902e-07
		602.35	4.16969e-07
		602.7	3.99826e-07
		603.05	3.84118e-07
		603.4	3.68949e-07
		603.75	3.54303e-07
		604.1	3.40166e-07
		604.45	3.26524e-07
		604.8	3.13361e-07
		605.15	3.00665e-07
		605.5	2.88422e-07
		605.85	2.76618e-07
		606.2	2.65239e-07
		606.55	2.53483e-07
		606.9	2.42987e-07
		607.25	2.32874e-07
		607.6	2.23133e-07
		607.95	2.13751e-07
		608.3	2.04719e-07
		608.65	1.96024e-07
		609	1.87658e-07
		609.35	1.79608e-07
		609.7	1.71866e-07
		610.05	1.64421e-07
		610.4	1.57264e-07
		610.75	1.50385e-07
		611.1	1.43775e-07
		611.45	1.37424e-07
		611.8	1.31326e-07
		612.15	1.2547e-07
		612.5	1.19848e-07
		612.85	1.14453e-07
		613.2	1.09277e-07
		613.55	1.04312e-07
		613.9	9.95499e-08
		614.25	9.49844e-08
		614.6	9.06081e-08
		614.95	8.64144e-08
		615.3	8.23964e-08
		615.65	7.85478e-08
		616	7.48624e-08
		616.35	7.13341e-08
		616.7	6.7957e-08
		617.05	6.47254e-08
		617.4	6.16339e-08
		617.75	5.86769e-08
		618.1	5.58495e-08
		618.45	5.31465e-08
		618.8	5.05631e-08
		619.15	4.80946e-08
		619.5	4.57364e-08
		619.85	4.34843e-08
		620.2	4.13339e-08
		620.55	3.92811e-08
		620.9	3.73219e-08
		621.25	3.54527e-08
		621.6	3.36695e-08
		621.95	3.1969e-08
		622.3	3.03476e-08
		622.65	2.88021e-08
		623	2.73292e-08
		623.35	2.59259e-08
		623.7	2.45892e-08
		624.05	2.33162e-08
		624.4	2.21043e-08
		624.75	2.09506e-08
		625.1	1.98528e-08
		625.45	1.88084e-08
		625.8	1.78149e-08
		626.15	1.68702e-08
		626.5	1.5972e-08
		626.85	1.51183e-08
		627.2	1.4307e-08
		627.55	1.35363e-08
		627.9	1.28042e-08
		628.25	1.21091e-08
		628.6	1.14492e-08
		628.95	1.08228e-08
		629.3	1.02284e-08
		629.65	9.66452e-09
		630	9.1297e-09
		630.35	8.62256e-09
		630.7	8.14179e-09
		631.05	7.68612e-09
		631.4	7.25435e-09
		631.75	6.84531e-09
		632.1	6.4579e-09
		632.45	6.09106e-09
		632.8	5.74379e-09
		633.15	5.41512e-09
		633.5	5.10412e-09
		633.85	4.80991e-09
		634.2	4.53166e-09
		634.55	4.26856e-09
		634.9	4.01984e-09
		635.25	3.78478e-09
		635.6	3.56267e-09
		635.95	3.35285e-09
		636.3	3.15469e-09
		636.65	2.96758e-09
		637	2.79095e-09
		637.35	2.62425e-09
		637.7	2.46696e-09
		638.05	2.31858e-09
		638.4	2.17865e-09
		638.75	2.0467e-09
		639.1	1.92232e-09
		639.45	1.8051e-09
		639.8	1.69465e-09
		640.15	1.59061e-09
		640.5	1.49262e-09
		640.85	1.40036e-09
		641.2	1.31351e-09
		641.55	1.23177e-09
		641.9	1.15486e-09
		642.25	1.08252e-09
		642.6	1.01448e-09
		642.95	9.50507e-10
		643.3	8.9037e-10
		643.65	8.33854e-10
		644	0
		644.35	0
		644.7	0
		645.05	0
		645.4	0
		645.75	0
		646.1	0
		646.45	0
		646.8	0
		647.15	0
		647.5	0
		647.85	0
		648.2	0
		648.55	0
		648.9	0
		649.25	0
		649.6	0
		649.95	0
		650.3	0
		650.65	0
		651	0
		651.35	0
		651.7	0
		652.05	0
		652.4	0
		652.75	0
		653.1	0
		653.45	0
		653.8	0
		654.15	0
		654.5	0
		654.85	0
		655.2	0
		655.55	0
		655.9	0
		656.25	0
		656.6	0
		656.95	0
		657.3	0
		657.65	0
		658	0
		658.35	0
		658.7	0
		659.05	0
		659.4	0
		659.75	0
		660.1	0
		660.45	0
		660.8	0
		661.15	0
		661.5	0
		661.85	0
		662.2	0
		662.55	0
		662.9	0
		663.25	0
		663.6	0
		663.95	0
		664.3	0
		664.65	0
		665	0
		665.35	0
		665.7	0
		666.05	0
		666.4	0
		666.75	0
		667.1	0
		667.45	0
		667.8	0
		668.15	0
		668.5	0
		668.85	0
		669.2	0
		669.55	0
		669.9	0
		670.25	0
		670.6	0
		670.95	0
		671.3	0
		671.65	0
		672	0
		672.35	0
		672.7	0
		673.05	0
		673.4	0
		673.75	0
		674.1	0
		674.45	0
		674.8	0
		675.15	0
		675.5	0
		675.85	0
		676.2	0
		676.55	0
		676.9	0
		677.25	0
		677.6	0
		677.95	0
		678.3	0
		678.65	0
		679	0
		679.35	0
		679.7	0
		680.05	0
		680.4	0
		680.75	0
		681.1	0
		681.45	0
		681.8	0
		682.15	0
		682.5	0
		682.85	0
		683.2	0
		683.55	0
		683.9	0
		684.25	0
		684.6	0
		684.95	0
		685.3	0
		685.65	0
		686	0
		686.35	0
		686.7	0
		687.05	0
		687.4	0
		687.75	0
		688.1	0
		688.45	0
		688.8	0
		689.15	0
		689.5	0
		689.85	0
		690.2	0
		690.55	0
		690.9	0
		691.25	0
		691.6	0
		691.95	0
		692.3	0
		692.65	0
		693	0
		693.35	0
		693.7	0
		694.05	0
		694.4	0
		694.75	0
		695.1	0
		695.45	0
		695.8	0
		696.15	0
		696.5	0
		696.85	0
		697.2	0
		697.55	0
		697.9	0
		698.25	0
		698.6	0
		698.95	0
		699.3	0
		699.65	0
[truncated: 1 more rows]

## Sheet: PlotDat3
Source sheet	retro_fore_dz	0	0
Plot name	ProbDens1	0.13	0
Plot Type	16	0.26	0
1st free col	5	0.39	0
Sigma Level	2	0.52	0
Absolute Errs	TRUE	0.65	0
Symbol Type	1	0.78	0
Inverse Plot	FALSE	0.91	0
Color Plot	TRUE	1.04	0
3D plot	FALSE	1.17	0
Linear	FALSE	1.3	0
Data Range	A1:B576	1.43	0
Filled Symbols	TRUE	1.56	0
ConcAge	FALSE	1.69	0
ConcSwap	FALSE	1.82	0
1st Symbol-row	1	1.95	0
		2.08	0
		2.21	0
		2.34	0
		2.47	0
		2.6	0
		2.73	0
		2.86	0
		2.99	0
		3.12	0
		3.25	0
		3.38	3.61241e-08
		3.51	1.07831e-06
		3.64	1.79361e-05
		3.77	0.000166245
		3.9	0.000858622
		4.03	0.00247111
		4.16	0.00396294
		4.29	0.00354143
		4.42	0.00176351
		4.55	0.000489379
		4.68	7.57622e-05
		4.81	6.7388e-06
		4.94	1.22376e-06
		5.07	4.82005e-05
		5.2	0.00107699
		5.33	0.00528541
		5.46	0.00560918
		5.59	0.00129523
		5.72	9.01224e-05
		5.85	9.40566e-05
		5.98	0.000400311
		6.11	0.00136729
		6.24	0.00322631
		6.37	0.00527682
		6.5	0.00644956
		6.63	0.0066192
		6.76	0.00622984
		6.89	0.00585076
		7.02	0.00706469
		7.15	0.00935803
		7.28	0.00871684
		7.41	0.00840125
		7.54	0.0120825
		7.67	0.0155363
		7.8	0.0161332
		7.93	0.0161636
		8.06	0.0163797
		8.19	0.0163733
		8.32	0.0164466
		8.45	0.0169954
		8.58	0.0180461
		8.71	0.0191402
		8.84	0.0195599
		8.97	0.0190906
		9.1	0.0184055
		9.23	0.0182371
		9.36	0.0184389
		9.49	0.0183368
		9.62	0.0178162
		9.75	0.0172971
		9.88	0.0165413
		10.01	0.0151376
		10.14	0.0140374
		10.27	0.0143056
		10.4	0.0153523
		10.53	0.0157381
		10.66	0.0146236
		10.79	0.0123172
		10.92	0.0100571
		11.05	0.00908207
		11.18	0.00960402
		11.31	0.0107587
		11.44	0.0115395
		11.57	0.0116194
		11.7	0.0112225
		11.83	0.0104559
		11.96	0.00917503
		12.09	0.00745014
		12.22	0.00574291
		12.35	0.00459842
		12.48	0.00438947
		12.61	0.00524054
		12.74	0.00697941
		12.87	0.00913953
		13	0.011065
		13.13	0.0123156
		13.26	0.0131059
		13.39	0.0140365
		13.52	0.0154693
		13.65	0.0172688
		13.78	0.0189462
		13.91	0.0200378
		14.04	0.0202718
		14.17	0.0194612
		14.3	0.0178005
		14.43	0.016398
		14.56	0.0169886
		14.69	0.0204903
		14.82	0.0250565
		14.95	0.0270238
		15.08	0.0258756
		15.21	0.0249458
		15.34	0.0264126
		15.47	0.0294103
		15.6	0.0318594
		15.73	0.0322342
		15.86	0.0303185
		15.99	0.0268514
		16.12	0.022846
		16.25	0.0192097
		16.38	0.0164565
		16.51	0.0145911
		16.64	0.0133278
		16.77	0.0123895
		16.9	0.011627
		17.03	0.0109724
		17.16	0.0103528
		17.29	0.00965728
		17.42	0.00878301
		17.55	0.0077131
		17.68	0.00654671
		17.81	0.00545169
		17.94	0.00458527
		18.07	0.00404783
		18.2	0.00388599
		18.33	0.00411181
		18.46	0.00470407
		18.59	0.00559225
		18.72	0.00665235
		18.85	0.00774015
		18.98	0.00875561
		19.11	0.00969979
		19.24	0.0106887
		19.37	0.0119206
		19.5	0.0135925
		19.63	0.0157285
		19.76	0.017999
		19.89	0.0198293
		20.02	0.0208714
		20.15	0.021272
		20.28	0.0213086
		20.41	0.0209312
		20.54	0.0198884
		20.67	0.0181985
		20.8	0.0163091
		20.93	0.014809
		21.06	0.0140723
		21.19	0.0141364
		21.32	0.0147852
		21.45	0.0156712
		21.58	0.0164151
		21.71	0.0167104
		21.84	0.0164274
		21.97	0.0156588
		22.1	0.0146615
		22.23	0.013724
		22.36	0.0130337
		22.49	0.012609
		22.62	0.0123188
		22.75	0.0119735
		22.88	0.0114411
		23.01	0.0107244
		23.14	0.00995764
		23.27	0.00933266
		23.4	0.00900639
		23.53	0.00903705
		23.66	0.009371
		23.79	0.00988239
		23.92	0.0104644
		24.05	0.0111692
		24.18	0.0122806
		24.31	0.0139241
		24.44	0.0153126
		24.57	0.0151855
		24.7	0.0134831
		24.83	0.011343
		24.96	0.00953511
		25.09	0.00810731
		25.22	0.00699196
		25.35	0.00621873
		25.48	0.00581686
		25.61	0.00576567
		25.74	0.00600553
		25.87	0.00644655
		26	0.00696758
		26.13	0.00742883
		26.26	0.00770851
		26.39	0.00774333
		26.52	0.00754071
		26.65	0.00715396
		26.78	0.00664321
		26.91	0.00605271
		27.04	0.00541393
		27.17	0.00476017
		27.3	0.00413492
		27.43	0.00358817
		27.56	0.00316673
		27.69	0.00290672
		27.82	0.00283078
		27.95	0.00294792
		28.08	0.00325189
		28.21	0.00371675
		28.34	0.00429239
		28.47	0.00490608
		28.6	0.00547505
		28.73	0.00592958
		28.86	0.00623685
		28.99	0.00641016
		29.12	0.00649203
		29.25	0.00651669
		29.38	0.00647745
		29.51	0.00632746
		29.64	0.00601876
		29.77	0.00554959
		29.9	0.00497913
		30.03	0.00439664
		30.16	0.00387147
		30.29	0.00342338
		30.42	0.00302948
		30.55	0.0026538
		30.68	0.0022744
		30.81	0.00189346
		30.94	0.00153151
		31.07	0.00121506
		31.2	0.000965809
		31.33	0.000795553
		31.46	0.000706142
		31.59	0.000692371
		31.72	0.000745413
		31.85	0.000855409
		31.98	0.00101295
		32.11	0.00120978
		32.24	0.00143922
		32.37	0.0016963
		32.5	0.0019776
		32.63	0.00228036
		32.76	0.00260091
		32.89	0.00293283
		33.02	0.00326551
		33.15	0.00358427
		33.28	0.00387229
		33.41	0.00411418
		33.54	0.00430014
		33.67	0.00442902
		33.8	0.00450915
		33.93	0.00455649
		34.06	0.00459074
		34.19	0.00463074
		34.32	0.00469081
		34.45	0.0047787
		34.58	0.00489565
		34.71	0.0050381
		34.84	0.00520019
		34.97	0.00537706
		35.1	0.00556871
		35.23	0.00578456
		35.36	0.006047
		35.49	0.00638907
		35.62	0.00684035
		35.75	0.00740086
		35.88	0.00801707
		36.01	0.00858417
		36.14	0.00898774
		36.27	0.00916575
		36.4	0.00914628
		36.53	0.00903044
		36.66	0.00893306
		36.79	0.00892558
		36.92	0.00901539
		37.05	0.00916236
		37.18	0.0093096
		37.31	0.00940749
		37.44	0.00942465
		37.57	0.00934916
		37.7	0.00918567
		37.83	0.00895139
		37.96	0.00867153
		38.09	0.00837462
		38.22	0.0080881
		38.35	0.00783469
		38.48	0.00763012
		38.61	0.00748232
		38.74	0.00739179
		38.87	0.00735281
		39	0.00735499
		39.13	0.00738483
		39.26	0.00742722
		39.39	0.00746674
		39.52	0.00748894
		39.65	0.0074816
		39.78	0.00743569
		39.91	0.00734605
		40.04	0.00721144
		40.17	0.00703409
		40.3	0.00681902
		40.43	0.0065732
		40.56	0.00630506
		40.69	0.00602415
		40.82	0.00574089
		40.95	0.00546624
		41.08	0.0052108
		41.21	0.00498372
		41.34	0.00479134
		41.47	0.0046361
		41.6	0.00451608
		41.73	0.00442539
		41.86	0.00435532
		41.99	0.00429634
		42.12	0.00424017
		42.25	0.00418185
		42.38	0.00412104
		42.51	0.00406237
		42.64	0.0040146
		42.77	0.00398873
		42.9	0.00399549
		43.03	0.00404263
		43.16	0.00413273
		43.29	0.00426179
		43.42	0.00441918
		43.55	0.0045887
		43.68	0.00475059
		43.81	0.00488417
		43.94	0.00497051
		44.07	0.00499478
		44.2	0.0049479
		44.33	0.0048273
		44.46	0.0046368
		44.59	0.00438575
		44.72	0.00408762
		44.85	0.00375841
		44.98	0.00341513
		45.11	0.00307464
		45.24	0.00275292
		45.37	0.00246484
		45.5	0.00222419
		45.63	0.00204332
		45.76	0.00193212
		45.89	0.00189572
		46.02	0.00193143
		46.15	0.00202586
		46.28	0.002154
		46.41	0.00228189
		46.54	0.00237299
		46.67	0.00239702
		46.8	0.00233799
		46.93	0.00219828
		47.06	0.00199709
		47.19	0.00176382
		47.32	0.00152929
		47.45	0.00131813
		47.58	0.00114465
		47.71	0.00101275
		47.84	0.000918667
		47.97	0.000854787
		48.1	0.00081294
		48.23	0.00078645
		48.36	0.00077091
		48.49	0.000764085
		48.62	0.000765416
		48.75	0.000775429
		48.88	0.000795253
		49.01	0.000826225
		49.14	0.000869615
		49.27	0.000926374
		49.4	0.000996949
		49.53	0.00108112
		49.66	0.00117789
		49.79	0.00128539
		49.92	0.00140096
		50.05	0.00152123
		50.18	0.00164235
		50.31	0.00176028
		50.44	0.00187127
		50.57	0.0019723
		50.7	0.00206168
		50.83	0.00213963
		50.96	0.00220871
		51.09	0.00227408
		51.22	0.00234312
		51.35	0.00242448
		51.48	0.00252621
		51.61	0.00265337
		51.74	0.0028056
		51.87	0.00297549
		52	0.00314872
		52.13	0.00330631
		52.26	0.0034288
		52.39	0.00350112
		52.52	0.00351675
		52.65	0.00347951
		52.78	0.00340249
		52.91	0.00330455
		53.04	0.00320559
		53.17	0.00312228
		53.3	0.00306539
		53.43	0.00303919
		53.56	0.0030425
		53.69	0.00307083
		53.82	0.00311838
		53.95	0.0031797
		54.08	0.00325059
		54.21	0.00332829
		54.34	0.00341127
		54.47	0.00349875
		54.6	0.00359024
		54.73	0.0036852
		54.86	0.00378282
		54.99	0.00388203
		55.12	0.00398165
		55.25	0.00408048
		55.38	0.00417727
		55.51	0.00427052
		55.64	0.00435812
		55.77	0.00443701
		55.9	0.00450322
		56.03	0.00455247
		56.16	0.00458141
		56.29	0.00458921
		56.42	0.00457898
		56.55	0.00455837
		56.68	0.00453927
		56.81	0.00453866
		56.94	0.00459272
		57.07	0.00480855
		57.2	0.00541475
		57.33	0.00657602
		57.46	0.00790105
		57.59	0.00846823
		57.72	0.00788394
		57.85	0.00682139
		57.98	0.00608018
		58.11	0.00580215
		58.24	0.00575033
		58.37	0.0057405
		58.5	0.00571131
		58.63	0.00565429
		58.76	0.00557288
		58.89	0.00547206
		59.02	0.00535664
		59.15	0.00523121
		59.28	0.00510007
		59.41	0.00496726
		59.54	0.0048365
		59.67	0.00471104
		59.8	0.00459352
		59.93	0.00448587
		60.06	0.00438928
		60.19	0.00430429
		60.32	0.00423096
		60.45	0.00416911
		60.58	0.00411858
		60.71	0.00407957
		60.84	0.00405285
		60.97	0.00404005
		61.1	0.00404382
		61.23	0.00406794
		61.36	0.00411724
		61.49	0.00419733
		61.62	0.00431392
		61.75	0.00447179
		61.88	0.0046735
		62.01	0.00491803
		62.14	0.00519972
		62.27	0.00550809
		62.4	0.00582875
		62.53	0.00614547
		62.66	0.00644325
		62.79	0.0067114
		62.92	0.00694603
		63.05	0.00715095
		63.18	0.00733673
		63.31	0.00751798
		63.44	0.00770957
		63.57	0.00792266
		63.7	0.00816166
		63.83	0.00842271
		63.96	0.00869424
		64.09	0.00895925
		64.22	0.00919897
		64.35	0.00939699
		64.48	0.00954317
		64.61	0.00963678
		64.74	0.00968877
		64.87	0.00972334
		65	0.00977749
		65.13	0.00989566
		65.26	0.0101157
		65.39	0.0104463
		65.52	0.0108463
		65.65	0.0112233
		65.78	0.0114634
		65.91	0.0114823
		66.04	0.0112655
		66.17	0.0108712
		66.3	0.0103931
		66.43	0.00991266
		66.56	0.00947092
		66.69	0.00906946
		66.82	0.00868985
		66.95	0.00831308
		67.08	0.00792943
		67.21	0.00753921
		67.34	0.00714909
		67.47	0.00676812
		67.6	0.00640527
		67.73	0.00606897
		67.86	0.00576857
		67.99	0.00551774
		68.12	0.00533829
		68.25	0.00526073
		68.38	0.00531587
		68.51	0.00551473
		68.64	0.00582445
		68.77	0.00615933
		68.9	0.00640418
		69.03	0.00646528
		69.16	0.00631708
		69.29	0.00601018
		69.42	0.0056346
		69.55	0.00526761
		69.68	0.0049424
		69.81	0.00465108
		69.94	0.00436847
		70.07	0.00407516
		70.2	0.00376758
		70.33	0.00345586
		70.46	0.00315632
		70.59	0.00288414
		70.72	0.00264909
		70.85	0.00245435
		70.98	0.00229748
		71.11	0.00217242
		71.24	0.00207151
		71.37	0.0019871
		71.5	0.00191251
		71.63	0.00184247
		71.76	0.00177316
		71.89	0.00170201
		72.02	0.00162759
		72.15	0.00154932
		72.28	0.00146735
		72.41	0.00138238
		72.54	0.00129553
		72.67	0.00120822
		72.8	0.00112201
		72.93	0.00103853
		73.06	0.000959302
		73.19	0.00088571
		73.32	0.000818892
		73.45	0.0007597
		73.58	0.000708676
		73.71	0.000666046
		73.84	0.000631739
		73.97	0.00060542
		74.1	0.000586531
		74.23	0.000574337
		74.36	0.000567973
		74.49	0.000566495
		74.62	0.000568922
		74.75	0.000574266
		74.88	0.000581575
		75.01	0.000589939
		75.14	0.000598523
		75.27	0.000606574
		75.4	0.000613436
		75.53	0.000618548
		75.66	0.000621457
		75.79	0.000621813
		75.92	0.000619372
		76.05	0.000613996
		76.18	0.000605647
		76.31	0.000594378
		76.44	0.000580329
		76.57	0.000563712
		76.7	0.000544807
		76.83	0.000523942
		76.96	0.000501482
		77.09	0.000477814
		77.22	0.000453337
		77.35	0.000428445
		77.48	0.000403522
		77.61	0.000378918
		77.74	0.000354955
		77.87	0.000331919
		78	0.000310047
		78.13	0.000289536
		78.26	0.000270527
		78.39	0.00025313
		78.52	0.000237408
		78.65	0.000223383
		78.78	0.000211051
		78.91	0.000200379
		79.04	0.000191317
		79.17	0.000183791
		79.3	0.000177723
		79.43	0.00017303
		79.56	0.000169623
		79.69	0.000167422
		79.82	0.000166348
		79.95	0.000166325
		80.08	0.000167294
		80.21	0.000169201
		80.34	0.000171995
		80.47	0.000175647
		80.6	0.000180132
		80.73	0.000185431
		80.86	0.000191541
		80.99	0.000198465
		81.12	0.00020622
		81.25	0.000214838
		81.38	0.000224364
		81.51	0.000234864
		81.64	0.000246435
		81.77	0.000259207
		81.9	0.00027336
		82.03	0.000289123
		82.16	0.000306798
		82.29	0.00032676
		82.42	0.000349474
		82.55	0.000375495
		82.68	0.000405468
		82.81	0.00044011
		82.94	0.000480194
		83.07	0.000526507
		83.2	0.000579811
		83.33	0.000640772
		83.46	0.000709898
		83.59	0.000787471
		83.72	0.000873465
		83.85	0.000967506
		83.98	0.00106882
		84.11	0.00117624
		84.24	0.00128823
		84.37	0.00140291
		84.5	0.00151821
		84.63	0.00163193
		84.76	0.00174194
		84.89	0.00184626
		85.02	0.00194323
		85.15	0.00203163
		85.28	0.00211072
		85.41	0.00218034
		85.54	0.00224083
		85.67	0.00229306
		85.8	0.00233827
		85.93	0.00237805
		86.06	0.00241416
		86.19	0.00244847
		86.32	0.00248282
		86.45	0.00251895
		86.58	0.00255848
		86.71	0.0026028
		86.84	0.00265316
		86.97	0.0027106
		87.1	0.00277601
		87.23	0.00285019
		87.36	0.00293381
		87.49	0.00302755
		87.62	0.00313202
		87.75	0.00324788
		87.88	0.00337578
		88.01	0.00351641
		88.14	0.00367046
		88.27	0.00383863
		88.4	0.00402158
		88.53	0.00421987
		88.66	0.00443392
		88.79	0.00466395
		88.92	0.00490984
		89.05	0.00517112
		89.18	0.00544686
		89.31	0.00573558
		89.44	0.00603525
		89.57	0.00634331
		89.7	0.00665668
		89.83	0.00697202
		89.96	0.00728596
		90.09	0.0075955
		90.22	0.00789858
		90.35	0.00819462
		90.48	0.00848504
		90.61	0.00877344
		90.74	0.00906528
		90.87	0.00936678
		91	0.009683
		91.13	0.0100155
		91.26	0.0103596
		91.39	0.010703
		91.52	0.011025
		91.65	0.0112985
		91.78	0.0114931
		91.91	0.0115805
		92.04	0.0115395
		92.17	0.0113606
		92.3	0.0110487
		92.43	0.0106226
		92.56	0.010112
		92.69	0.00955252
		92.82	0.00897985
		92.95	0.00842443
		93.08	0.00790842
		93.21	0.00744483
		93.34	0.00703872
		93.47	0.00668957
		93.6	0.00639385
		93.73	0.00614715
		93.86	0.00594534
		93.99	0.00578507
		94.12	0.00566367
		94.25	0.00557875
		94.38	0.00552793
		94.51	0.00550849
		94.64	0.00551725
		94.77	0.00555061
		94.9	0.00560458
		95.03	0.00567494
		95.16	0.00575737
		95.29	0.00584764
		95.42	0.00594177
		95.55	0.00603615
		95.68	0.00612771
		95.81	0.00621406
		95.94	0.00629366
		96.07	0.00636614
		96.2	0.00643275
		96.33	0.00649704
		96.46	0.00656554
		96.59	0.0066481
		96.72	0.00675701
		96.85	0.00690427
		96.98	0.00709671
		97.11	0.00733019
		97.24	0.0075853
		97.37	0.00782782
		97.5	0.00801564
		97.63	0.00811089
		97.76	0.00809267
		97.89	0.00796449
		98.02	0.00775289
		98.15	0.00749787
		98.28	0.00723966
		98.41	0.0070078
		98.54	0.00681615
		98.67	0.00666418
		98.8	0.00654207
		98.93	0.00643662
		99.06	0.00633555
		99.19	0.00622972
		99.32	0.00611351
		99.45	0.00598434
		99.58	0.00584184
		99.71	0.00568713
		99.84	0.00552225
		99.97	0.00534981
		100.1	0.00517267
		100.23	0.00499376
		100.36	0.00481588
		100.49	0.00464161
		100.62	0.00447314
		100.75	0.00431231
		100.88	0.00416047
		101.01	0.00401854
		101.14	0.00388694
		101.27	0.00376567
		101.4	0.00365428
		101.53	0.00355197
		101.66	0.00345758
		101.79	0.00336974
		101.92	0.00328691
		102.05	0.00320757
		102.18	0.00313029
		102.31	0.00305393
		102.44	0.00297779
		102.57	0.00290168
		102.7	0.00282608
		102.83	0.00275217
		102.96	0.0026818
		103.09	0.00261745
		103.22	0.00256201
		103.35	0.00251853
		103.48	0.00248987
		103.61	0.00247832
		103.74	0.00248511
		103.87	0.0025101
		104	0.00255153
		104.13	0.00260593
		104.26	0.0026684
		104.39	0.00273315
		104.52	0.00279441
		104.65	0.00284775
		104.78	0.00289186
		104.91	0.00293061
		105.04	0.00297474
		105.17	0.00304209
		105.3	0.0031543
		105.43	0.00332931
		105.56	0.00357059
		105.69	0.00385826
		105.82	0.00414861
		105.95	0.00438633
		106.08	0.0045263
		106.21	0.0045544
		106.34	0.00449545
		106.47	0.00440317
		106.6	0.00433768
		106.73	0.0043428
		106.86	0.00443365
		106.99	0.00459761
		107.12	0.00480455
		107.25	0.00501958
		107.38	0.0052132
		107.51	0.00536706
		107.64	0.00547559
		107.77	0.00554466
		107.9	0.00558842
		108.03	0.00562514
		108.16	0.00567289
		108.29	0.00574601
		108.42	0.00585272
		108.55	0.00599459
		108.68	0.0061674
		108.81	0.00636347
		108.94	0.00657465
		109.07	0.00679524
		109.2	0.00702385
		109.33	0.00726337
		109.46	0.00751817
		109.59	0.00778923
		109.72	0.00806885
		109.85	0.00833804
		109.98	0.00856897
		110.11	0.00873312
		110.24	0.00881244
		110.37	0.00880872
		110.5	0.00874648
		110.63	0.008668
		110.76	0.00862231
		110.89	0.00865245
		111.02	0.00878472
		111.15	0.00902132
		111.28	0.00933658
		111.41	0.00967761
		111.54	0.00997115
		111.67	0.010138
		111.8	0.0101131
		111.93	0.00986427
		112.06	0.00940153
		112.19	0.00877213
		112.32	0.0080438
		112.45	0.00728422
		112.58	0.00654567
		112.71	0.00585934
		112.84	0.00523819
		112.97	0.00468393
		113.1	0.00419361
		113.23	0.0037637
		113.36	0.00339137
		113.49	0.00307431
		113.62	0.00280989
		113.75	0.00259459
		113.88	0.00242376
		114.01	0.0022917
		114.14	0.00219192
		114.27	0.00211759
		114.4	0.0020619
		114.53	0.00201853
		114.66	0.00198193
		114.79	0.00194762
		114.92	0.0019123
		115.05	0.00187396
		115.18	0.00183176
		115.31	0.00178585
		115.44	0.00173719
		115.57	0.00168722
		115.7	0.00163756
		115.83	0.00158976
		115.96	0.00154504
		116.09	0.00150417
		116.22	0.00146737
		116.35	0.0014343
		116.48	0.00140417
		116.61	0.0013758
		116.74	0.00134784
		116.87	0.00131885
		117	0.00128751
		117.13	0.0012527
		117.26	0.00121362
		117.39	0.0011698
		117.52	0.00112117
		117.65	0.00106799
		117.78	0.00101083
		117.91	0.000950531
		118.04	0.000888069
		118.17	0.000824533
		118.3	0.000761027
		118.43	0.00069861
		118.56	0.00063824
		118.69	0.000580735
		118.82	0.000526746
		118.95	0.000476755
		119.08	0.000431059
		119.21	0.000389799
		119.34	0.000352967
		119.47	0.000320444
		119.6	0.000292011
		119.73	0.000267393
		119.86	0.000246271
		119.99	0.000228321
		120.12	0.000213223
		120.25	0.000200683
		120.38	0.000190446
		120.51	0.000182305
		120.64	0.000176108
		120.77	0.000171763
		120.9	0.000169245
		121.03	0.000168583
		121.16	0.000169872
		121.29	0.000173274
		121.42	0.000179008
		121.55	0.000187356
		121.68	0.00019866
		121.81	0.000213312
		121.94	0.000231756
		122.07	0.00025447
		122.2	0.000281955
		122.33	0.000314709
		122.46	0.000353194
		122.59	0.000397791
		122.72	0.000448753
		122.85	0.000506142
		122.98	0.000569761
		123.11	0.000639092
		123.24	0.000713253
		123.37	0.000790943
		123.5	0.000870446
		123.63	0.000949652
		123.76	0.00102612
		123.89	0.00109717
		124.02	0.00116006
		124.15	0.00121211
		124.28	0.0012509
		124.41	0.00127448
		124.54	0.00128146
		124.67	0.00127121
		124.8	0.00124385
		124.93	0.00120029
		125.06	0.00114218
		125.19	0.00107175
		125.32	0.000991701
		125.45	0.000904968
		125.58	0.000814558
		125.71	0.000723347
		125.84	0.000633929
		125.97	0.000548496
		126.1	0.000468767
		126.23	0.000395953
		126.36	0.000330781
		126.49	0.000273532
		126.62	0.000224116
		126.75	0.000182152
		126.88	0.000147047
		127.01	0.000118086
		127.14	9.44914e-05
		127.27	7.54844e-05
		127.4	6.0323e-05
		127.53	4.83293e-05
		127.66	3.89048e-05
		127.79	3.15357e-05
		127.92	2.57912e-05
		128.05	2.13182e-05
		128.18	1.78314e-05
		128.31	1.51047e-05
		128.44	1.29609e-05
		128.57	1.12626e-05
		128.7	9.9046e-06
		128.83	8.80696e-06
		128.96	7.90939e-06
		129.09	7.16681e-06
		129.22	6.5458e-06
		129.35	6.02176e-06
		129.48	5.57511e-06
		129.61	5.19662e-06
		129.74	4.87445e-06
		129.87	4.60473e-06
		130	4.38193e-06
		130.13	4.20386e-06
		130.26	4.06961e-06
		130.39	3.97927e-06
		130.52	3.93379e-06
		130.65	3.93483e-06
		130.78	3.98472e-06
		130.91	4.08511e-06
		131.04	4.24263e-06
		131.17	4.45936e-06
		131.3	4.74182e-06
		131.43	5.09252e-06
		131.56	5.51865e-06
		131.69	6.02525e-06
		131.82	6.62281e-06
		131.95	7.31741e-06
		132.08	8.11756e-06
		132.21	9.03244e-06
		132.34	1.00737e-05
		132.47	1.12507e-05
		132.6	1.25728e-05
		132.73	1.4055e-05
		132.86	1.57089e-05
		132.99	1.75474e-05
		133.12	1.95825e-05
		133.25	2.18321e-05
		133.38	2.43082e-05
		133.51	2.7028e-05
		133.64	3.00076e-05
		133.77	3.32641e-05
		133.9	3.68149e-05
		134.03	4.06781e-05
		134.16	4.48724e-05
		134.29	4.94172e-05
		134.42	5.43343e-05
		134.55	5.96414e-05
		134.68	6.53616e-05
		134.81	7.15176e-05
		134.94	7.8133e-05
		135.07	8.52323e-05
		135.2	9.28435e-05
		135.33	0.000100991
		135.46	0.000109706
		135.59	0.000119018
		135.72	0.000128961
		135.85	0.000139568
		135.98	0.000150881
		136.11	0.000162939
		136.24	0.000175787
		136.37	0.000189478
		136.5	0.000204069
		136.63	0.000219631
		136.76	0.000236245
		136.89	0.000254012
		137.02	0.000273052
		137.15	0.000293518
		137.28	0.000315589
		137.41	0.00033949
		137.54	0.00036549
		137.67	0.000393914
		137.8	0.000425138
		137.93	0.000459606
		138.06	0.000497816
		138.19	0.000540345
		138.32	0.000587833
		138.45	0.000641008
		138.58	0.000700687
		138.71	0.000767792
		138.84	0.000843354
		138.97	0.000928516
		139.1	0.00102447
		139.23	0.00113238
		139.36	0.00125318
		139.49	0.00138737
		139.62	0.00153467
		139.75	0.00169369
		139.88	0.00186162
		140.01	0.00203409
		140.14	0.00220512
		140.27	0.00236749
		140.4	0.00251329
		140.53	0.00263479
		140.66	0.00272536
		140.79	0.00278044
		140.92	0.00279822
		141.05	0.00278003
		141.18	0.00273025
		141.31	0.00265577
		141.44	0.00256517
		141.57	0.00246764
		141.7	0.00237205
		141.83	0.00228604
		141.96	0.00221551
		142.09	0.00216442
		142.22	0.0021348
		142.35	0.00212712
		142.48	0.00214065
		142.61	0.0021739
		142.74	0.00222501
		142.87	0.00229203
		143	0.00237312
		143.13	0.00246662
		143.26	0.0025711
		143.39	0.00268531
		143.52	0.00280819
		143.65	0.00293879
		143.78	0.00307631
		143.91	0.00322008
		144.04	0.00336962
		144.17	0.00352467
		144.3	0.00368529
		144.43	0.0038519
		144.56	0.00402532
		144.69	0.00420675
		144.82	0.00439772
		144.95	0.0045999
		145.08	0.00481489
		145.21	0.00504393
		145.34	0.00528757
		145.47	0.00554536
		145.6	0.00581565
		145.73	0.00609549
		145.86	0.00638084
		145.99	0.00666682
		146.12	0.00694835
		146.25	0.00722077
		146.38	0.0074805
		146.51	0.00772563
		146.64	0.00795609
		146.77	0.00817354
		146.9	0.0083807
		147.03	0.00858043
		147.16	0.00877446
		147.29	0.00896239
		147.42	0.00914096
		147.55	0.0093041
		147.68	0.00944376
		147.81	0.00955146
		147.94	0.00962031
		148.07	0.00964692
		148.2	0.009633
		148.33	0.00958595
		148.46	0.0095185
		148.59	0.00944722
		148.72	0.00939002
		148.85	0.00936276
		148.98	0.0093755
		149.11	0.00942921
		149.24	0.00951372
		149.37	0.0096084
		149.5	0.00968569
		149.63	0.00971753
		149.76	0.00968266
		149.89	0.00957257
		150.02	0.00939394
		150.15	0.00916669
		150.28	0.00891828
		150.41	0.00867646
		150.54	0.00846294
		150.67	0.00828967
		150.8	0.00815821
		150.93	0.00806172
		151.06	0.00798815
		151.19	0.00792365
		151.32	0.00785531
		151.45	0.007773
		151.58	0.00767039
		151.71	0.00754514
		151.84	0.00739856
		151.97	0.00723474
		152.1	0.00705942
		152.23	0.00687867
		152.36	0.00669767
		152.49	0.0065199
		152.62	0.00634668
		152.75	0.00617741
		152.88	0.0060102
		153.01	0.00584281
		153.14	0.00567354
		153.27	0.00550199
		153.4	0.00532931
		153.53	0.00515808
		153.66	0.00499173
		153.79	0.00483388
		153.92	0.00468754
		154.05	0.00455454
		154.18	0.00443534
		154.31	0.00432901
		154.44	0.00423364
		154.57	0.00414679
		154.7	0.00406604
		154.83	0.0039894
		154.96	0.00391568
		155.09	0.0038445
		155.22	0.0037763
		155.35	0.00371213
		155.48	0.00365338
		155.61	0.00360158
		155.74	0.00355811
		155.87	0.00352408
		156	0.00350028
		156.13	0.00348723
		156.26	0.00348523
		156.39	0.00349472
		156.52	0.00351644
		156.65	0.00355185
		156.78	0.00360337
		156.91	0.00367448
		157.04	0.00376945
		157.17	0.00389255
		157.3	0.0040468
		157.43	0.00423227
		157.56	0.00444446
		157.69	0.00467331
		157.82	0.00490352
		157.95	0.00511634
		158.08	0.00529289
		158.21	0.00541803
		158.34	0.00548376
		158.47	0.0054911
		158.6	0.00544972
		158.73	0.00537551
		158.86	0.00528692
		158.99	0.00520111
		159.12	0.00513115
		159.25	0.0050846
		159.38	0.00506372
		159.51	0.00506672
		159.64	0.00508948
		159.77	0.00512715
		159.9	0.00517537
		160.03	0.00523087
		160.16	0.0052917
		160.29	0.0053571
		160.42	0.00542729
		160.55	0.00550316
		160.68	0.00558597
		160.81	0.00567709
		160.94	0.00577782
		161.07	0.00588916
		161.2	0.00601163
		161.33	0.00614518
		161.46	0.00628913
		161.59	0.00644215
		161.72	0.00660237
		161.85	0.00676753
		161.98	0.00693515
		162.11	0.00710282
		162.24	0.00726845
		162.37	0.00743042
		162.5	0.00758778
		162.63	0.00774033
		162.76	0.00788862
		162.89	0.00803389
		163.02	0.00817801
		163.15	0.00832338
		163.28	0.00847287
		163.41	0.00862975
		163.54	0.00879763
		163.67	0.00898039
		163.8	0.00918186
		163.93	0.00940551
		164.06	0.00965378
		164.19	0.00992734
		164.32	0.0102243
		164.45	0.0105393
		164.58	0.0108633
		164.71	0.0111838
		164.84	0.0114853
		164.97	0.0117506
		165.1	0.0119634
		165.23	0.0121095
		165.36	0.0121795
		165.49	0.0121697
		165.62	0.0120829
		165.75	0.0119282
		165.88	0.0117197
		166.01	0.0114748
		166.14	0.0112125
		166.27	0.0109511
		166.4	0.010707
		166.53	0.0104933
		166.66	0.0103193
		166.79	0.0101902
		166.92	0.0101072
		167.05	0.0100679
		167.18	0.0100668
		167.31	0.0100953
		167.44	0.010143
		167.57	0.0101979
		167.7	0.0102473
		167.83	0.0102787
		167.96	0.0102805
		168.09	0.0102432
		168.22	0.0101602
		168.35	0.0100282
		168.48	0.0098477
		168.61	0.00962289
		168.74	0.00936106
		168.87	0.0090719
		169	0.0087665
		169.13	0.00845625
		169.26	0.00815191
		169.39	0.00786286
		169.52	0.00759659
		169.65	0.00735852
		169.78	0.00715205
		169.91	0.00697874
		170.04	0.00683854
		170.17	0.00673006
		170.3	0.00665073
		170.43	0.00659691
		170.56	0.00656405
		170.69	0.00654685
		170.82	0.00653956
		170.95	0.00653634
		171.08	0.00653181
		171.21	0.00652153
		171.34	0.00650248
		171.47	0.00647336
		171.6	0.00643461
		171.73	0.00638831
		171.86	0.00633765
		171.99	0.00628644
		172.12	0.00623841
		172.25	0.00619667
		172.38	0.0061633
		172.51	0.00613908
		172.64	0.0061235
		172.77	0.00611488
		172.9	0.0061107
		173.03	0.00610789
		173.16	0.00610321
		173.29	0.00609356
		173.42	0.00607623
		173.55	0.00604904
		173.68	0.0060105
		173.81	0.00595982
		173.94	0.00589685
		174.07	0.0058221
		174.2	0.00573653
		174.33	0.00564153
		174.46	0.00553867
		174.59	0.0054296
		174.72	0.00531587
		174.85	0.00519883
		174.98	0.00507951
		175.11	0.00495861
		175.24	0.00483647
		175.37	0.00471317
		175.5	0.00458857
		175.63	0.00446248
		175.76	0.00433474
		175.89	0.00420533
		176.02	0.00407448
		176.15	0.00394269
		176.28	0.00381071
		176.41	0.00367954
		176.54	0.00355032
		176.67	0.00342426
		176.8	0.0033025
		176.93	0.00318608
		177.06	0.00307581
		177.19	0.00297227
		177.32	0.00287576
		177.45	0.00278634
		177.58	0.00270385
		177.71	0.00262795
		177.84	0.00255817
		177.97	0.00249401
		178.1	0.00243494
		178.23	0.00238043
		178.36	0.00233003
		178.49	0.00228336
		178.62	0.00224009
		178.75	0.00219995
		178.88	0.00216276
		179.01	0.00212836
		179.14	0.00209662
		179.27	0.00206743
		179.4	0.00204071
		179.53	0.00201633
		179.66	0.00199419
		179.79	0.00197417
		179.92	0.0019561
		180.05	0.00193985
		180.18	0.00192522
		180.31	0.00191204
		180.44	0.00190011
		180.57	0.00188923
		180.7	0.00187919
		180.83	0.0018698
		180.96	0.00186085
		181.09	0.00185217
		181.22	0.00184356
		181.35	0.00183486
		181.48	0.00182591
		181.61	0.00181657
		181.74	0.00180671
		181.87	0.00179623
		182	0.00178502
		182.13	0.00177302
		182.26	0.00176016
		182.39	0.00174639
		182.52	0.00173169
		182.65	0.00171604
		182.78	0.00169944
		182.91	0.00168191
		183.04	0.00166347
		183.17	0.00164415
		183.3	0.00162402
		183.43	0.00160312
		183.56	0.00158152
		183.69	0.00155929
		183.82	0.00153651
		183.95	0.00151325
		184.08	0.0014896
		184.21	0.00146564
		184.34	0.00144145
		184.47	0.0014171
		184.6	0.00139266
		184.73	0.00136822
		184.86	0.00134383
		184.99	0.00131954
		185.12	0.00129542
		185.25	0.0012715
		185.38	0.00124782
		185.51	0.00122442
		185.64	0.0012013
		185.77	0.00117849
		185.9	0.00115599
		186.03	0.00113382
		186.16	0.00111195
		186.29	0.0010904
		186.42	0.00106913
		186.55	0.00104815
		186.68	0.00102743
		186.81	0.00100695
		186.94	0.000986699
		187.07	0.000966652
		187.2	0.000946791
		187.33	0.000927099
		187.46	0.000907559
		187.59	0.000888158
		187.72	0.000868884
		187.85	0.00084973
		187.98	0.000830688
		188.11	0.000811758
		188.24	0.000792939
		188.37	0.000774237
		188.5	0.000755654
		188.63	0.000737201
		188.76	0.000718889
		188.89	0.000700732
		189.02	0.000682743
		189.15	0.00066494
		189.28	0.000647341
		189.41	0.000629962
		189.54	0.000612822
		189.67	0.000595942
		189.8	0.00057934
		189.93	0.000563032
		190.06	0.000547037
		190.19	0.000531372
		190.32	0.00051605
		190.45	0.000501086
		190.58	0.000486493
		190.71	0.000472283
		190.84	0.000458464
		190.97	0.000445045
		191.1	0.000432032
		191.23	0.000419432
		191.36	0.000407248
		191.49	0.000395482
		191.62	0.000384137
		191.75	0.000373214
		191.88	0.000362712
		192.01	0.000352631
		192.14	0.000342968
		192.27	0.000333724
		192.4	0.000324893
		192.53	0.000316478
		192.66	0.000308475
		192.79	0.000300884
		192.92	0.000293701
		193.05	0.00028693
		193.18	0.00028057
		193.31	0.000274621
		193.44	0.000269088
		193.57	0.000263974
		193.7	0.000259281
		193.83	0.000255017
		193.96	0.000251188
		194.09	0.000247801
		194.22	0.000244866
		194.35	0.000242393
		194.48	0.000240391
		194.61	0.000238875
		194.74	0.000237856
		194.87	0.000237346
		195	0.000237362
		195.13	0.000237915
		195.26	0.000239018
		195.39	0.000240686
		195.52	0.000242929
		195.65	0.000245762
		195.78	0.000249194
		195.91	0.000253235
		196.04	0.000257889
		196.17	0.000263165
		196.3	0.000269064
		196.43	0.000275585
		196.56	0.000282724
		196.69	0.000290475
		196.82	0.000298824
		196.95	0.000307761
		197.08	0.000317263
		197.21	0.000327306
		197.34	0.000337863
		197.47	0.000348901
		197.6	0.000360378
		197.73	0.000372257
		197.86	0.000384486
		197.99	0.000397013
		198.12	0.000409782
		198.25	0.000422733
		198.38	0.000435801
		198.51	0.000448919
		198.64	0.000462016
		198.77	0.00047502
		198.9	0.000487857
		199.03	0.000500453
		199.16	0.000512729
		199.29	0.000524613
		199.42	0.000536033
		199.55	0.000546913
		199.68	0.000557191
		199.81	0.000566794
		199.94	0.000575669
		200.07	0.000583759
		200.2	0.000591016
		200.33	0.000597396
		200.46	0.000602869
		200.59	0.000607404
		200.72	0.000610985
		200.85	0.000613604
		200.98	0.000615263
		201.11	0.000615973
		201.24	0.000615755
		201.37	0.000614639
		201.5	0.000612669
		201.63	0.000609898
		201.76	0.000606385
		201.89	0.000602208
		202.02	0.000597449
		202.15	0.000592199
		202.28	0.000586563
		202.41	0.00058065
		202.54	0.000574581
		202.67	0.000568485
		202.8	0.000562498
		202.93	0.000556765
		203.06	0.00055144
		203.19	0.000546678
		203.32	0.000542646
		203.45	0.000539518
		203.58	0.00053747
		203.71	0.00053669
		203.84	0.000537366
		203.97	0.000539695
		204.1	0.000543879
		204.23	0.000550123
		204.36	0.000558635
		204.49	0.000569623
		204.62	0.000583297
		204.75	0.000599857
		204.88	0.000619499
		205.01	0.000642401
		205.14	0.000668725
		205.27	0.000698604
		205.4	0.000732139
		205.53	0.000769387
		205.66	0.000810358
		205.79	0.000854999
		205.92	0.0009032
		206.05	0.000954773
		206.18	0.00100946
		206.31	0.00106691
		206.44	0.00112673
		206.57	0.00118841
		206.7	0.00125141
		206.83	0.00131512
		206.96	0.00137889
		207.09	0.00144205
		207.22	0.00150393
		207.35	0.00156388
		207.48	0.00162126
		207.61	0.00167553
		207.74	0.00172621
		207.87	0.0017729
		208	0.00181533
		208.13	0.00185333
		208.26	0.00188685
		208.39	0.00191596
		208.52	0.00194082
		208.65	0.0019617
		208.78	0.00197893
		208.91	0.00199292
		209.04	0.0020041
		209.17	0.00201293
		209.3	0.00201985
		209.43	0.00202529
		209.56	0.00202964
		209.69	0.00203324
		209.82	0.00203637
		209.95	0.00203926
		210.08	0.00204206
		210.21	0.00204488
		210.34	0.00204776
		210.47	0.0020507
		210.6	0.00205364
		210.73	0.0020565
		210.86	0.00205916
		210.99	0.00206148
		211.12	0.00206328
		211.25	0.00206437
		211.38	0.00206453
		211.51	0.00206353
		211.64	0.00206112
		211.77	0.00205704
		211.9	0.00205103
		212.03	0.00204281
		212.16	0.00203214
		212.29	0.00201881
		212.42	0.00200261
		212.55	0.00198344
		212.68	0.00196124
		212.81	0.00193603
		212.94	0.00190796
		213.07	0.00187726
		213.2	0.00184427
		213.33	0.00180946
		213.46	0.00177338
		213.59	0.00173668
		213.72	0.00170008
		213.85	0.00166434
		213.98	0.00163026
		214.11	0.00159864
		214.24	0.00157022
		214.37	0.00154571
		214.5	0.00152572
		214.63	0.00151077
		214.76	0.00150122
		214.89	0.00149731
		215.02	0.00149914
		215.15	0.00150661
		215.28	0.0015195
		215.41	0.00153744
		215.54	0.00155991
		215.67	0.00158626
		215.8	0.00161578
		215.93	0.00164764
		216.06	0.00168101
		216.19	0.00171503
		216.32	0.00174884
		216.45	0.00178168
		216.58	0.00181284
		216.71	0.00184178
		216.84	0.00186812
		216.97	0.00189166
		217.1	0.00191248
		217.23	0.00193091
		217.36	0.00194758
		217.49	0.00196343
		217.62	0.00197969
		217.75	0.00199782
		217.88	0.00201949
		218.01	0.00204644
		218.14	0.00208036
		218.27	0.00212267
		218.4	0.00217441
		218.53	0.00223596
		218.66	0.00230696
		218.79	0.00238616
		218.92	0.00247142
		219.05	0.0025598
		219.18	0.0026477
		219.31	0.00273118
		219.44	0.0028063
		219.57	0.00286947
		219.7	0.00291778
		219.83	0.00294929
		219.96	0.00296321
		220.09	0.00295984
		220.22	0.00294056
		220.35	0.00290753
		220.48	0.00286345
		220.61	0.0028112
		220.74	0.00275358
		220.87	0.00269304
		221	0.00263151
		221.13	0.00257036
		221.26	0.00251043
		221.39	0.00245206
		221.52	0.00239525
		221.65	0.00233983
		221.78	0.00228554
		221.91	0.00223214
		222.04	0.00217954
		222.17	0.00212779
		222.3	0.00207711
		222.43	0.00202786
		222.56	0.00198052
		222.69	0.00193565
		222.82	0.00189382
		222.95	0.00185559
		223.08	0.00182149
		223.21	0.00179198
		223.34	0.00176742
		223.47	0.0017481
		223.6	0.00173422
		223.73	0.00172588
		223.86	0.00172314
		223.99	0.00172601
		224.12	0.00173447
		224.25	0.00174849
		224.38	0.00176806
		224.51	0.0017932
		224.64	0.00182397
		224.77	0.00186048
		224.9	0.00190286
		225.03	0.00195126
		225.16	0.0020058
		225.29	0.00206648
		225.42	0.00213319
		225.55	0.00220554
		225.68	0.00228285
		225.81	0.00236405
		225.94	0.00244764
		226.07	0.00253169
		226.2	0.00261387
		226.33	0.00269152
		226.46	0.00276179
		226.59	0.00282182
		226.72	0.00286889
		226.85	0.00290068
		226.98	0.00291542
		227.11	0.00291203
		227.24	0.00289025
		227.37	0.00285062
		227.5	0.00279447
		227.63	0.00272381
		227.76	0.00264111
		227.89	0.00254919
		228.02	0.00245094
		228.15	0.00234914
		228.28	0.00224632
		228.41	0.00214464
		228.54	0.00204577
		228.67	0.00195091
		228.8	0.0018608
		228.93	0.00177578
		229.06	0.00169585
		229.19	0.00162076
		229.32	0.00155011
		229.45	0.00148341
		229.58	0.00142012
		229.71	0.00135977
		229.84	0.00130189
		229.97	0.00124611
		230.1	0.00119213
		230.23	0.00113971
		230.36	0.00108868
		230.49	0.00103894
		230.62	0.000990407
		230.75	0.000943058
		230.88	0.000896881
		231.01	0.000851888
		231.14	0.0008081
		231.27	0.000765546
		231.4	0.000724256
		231.53	0.000684263
		231.66	0.000645598
		231.79	0.000608286
		231.92	0.000572352
		232.05	0.000537812
		232.18	0.000504682
		232.31	0.000472966
		232.44	0.000442666
		232.57	0.000413777
		232.7	0.000386289
		232.83	0.000360186
		232.96	0.000335447
		233.09	0.000312047
		233.22	0.000289954
		233.35	0.000269137
		233.48	0.000249557
		233.61	0.000231173
		233.74	0.000213943
		233.87	0.00019782
		234	0.000182759
		234.13	0.000168713
		234.26	0.000155632
		234.39	0.000143468
		234.52	0.000132171
		234.65	0.000121696
		234.78	0.000111994
		234.91	0.000103018
		235.04	9.47238e-05
		235.17	8.70663e-05
		235.3	8.00037e-05
		235.43	7.34953e-05
		235.56	6.75022e-05
		235.69	6.19872e-05
		235.82	5.69153e-05
		235.95	5.22533e-05
		236.08	4.79697e-05
		236.21	4.40353e-05
		236.34	4.04225e-05
		236.47	3.71057e-05
		236.6	3.40609e-05
		236.73	3.1266e-05
		236.86	2.87005e-05
		236.99	2.63453e-05
		237.12	2.41831e-05
		237.25	2.21977e-05
		237.38	2.03744e-05
		237.51	1.86996e-05
		237.64	1.71609e-05
		237.77	1.57469e-05
		237.9	1.44458e-05
		238.03	1.32496e-05
		238.16	1.21517e-05
		238.29	1.11404e-05
		238.42	1.02121e-05
		238.55	9.35821e-06
		238.68	8.57266e-06
		238.81	7.85001e-06
		238.94	7.18526e-06
		239.07	6.57383e-06
		239.2	6.01153e-06
		239.33	5.49451e-06
		239.46	5.01924e-06
		239.59	4.58246e-06
		239.72	4.1796e-06
		239.85	3.81134e-06
		239.98	3.47328e-06
		240.11	3.16155e-06
		240.24	2.87734e-06
		240.37	2.61528e-06
		240.5	2.37694e-06
		240.63	2.15869e-06
		240.76	1.95897e-06
		240.89	1.77633e-06
		241.02	1.60943e-06
		241.15	1.45703e-06
		241.28	1.31799e-06
		241.41	1.18963e-06
		241.54	1.07453e-06
		241.67	9.6806e-07
		241.8	8.73003e-07
		241.93	7.86573e-07
		242.06	7.0806e-07
		242.19	6.36808e-07
		242.32	5.72206e-07
		242.45	5.12145e-07
		242.58	4.59413e-07
		242.71	4.11731e-07
		242.84	3.68658e-07
		242.97	3.29785e-07
		243.1	2.94739e-07
		243.23	2.63172e-07
		243.36	2.34768e-07
		243.49	2.09234e-07
		243.62	1.86303e-07
		243.75	1.6573e-07
		243.88	1.4729e-07
		244.01	1.30779e-07
		244.14	1.14534e-07
		244.27	1.01577e-07
		244.4	8.99975e-08
		244.53	7.96597e-08
		244.66	7.04403e-08
		244.79	6.22267e-08
		244.92	5.4917e-08
		245.05	4.84184e-08
		245.18	4.2647e-08
		245.31	3.75266e-08
		245.44	3.29887e-08
		245.57	2.8971e-08
		245.7	2.54177e-08
		245.83	2.22784e-08
		245.96	1.95076e-08
		246.09	1.70647e-08
		246.22	1.49131e-08
		246.35	1.30199e-08
		246.48	1.1356e-08
		246.61	9.89498e-09
		246.74	8.61348e-09
		246.87	7.49059e-09
		247	6.50769e-09
		247.13	5.64823e-09
		247.26	4.89746e-09
		247.39	4.24233e-09
		247.52	3.67122e-09
		247.65	3.17389e-09
		247.78	2.74123e-09
		247.91	2.36523e-09
		248.04	2.03881e-09
		248.17	1.75571e-09
		248.3	0
		248.43	0
		248.56	0
		248.69	0
		248.82	0
		248.95	0
		249.08	0
		249.21	0
		249.34	0
		249.47	0
		249.6	0
		249.73	0
		249.86	0
		249.99	0
		250.12	0
		250.25	0
		250.38	0
		250.51	0
		250.64	0
		250.77	0
		250.9	0
		251.03	0
		251.16	0
		251.29	0
		251.42	0
		251.55	0
		251.68	0
		251.81	0
		251.94	0
		252.07	0
		252.2	0
		252.33	0
		252.46	0
		252.59	0
		252.72	0
		252.85	0
		252.98	0
		253.11	0
		253.24	0
		253.37	0
		253.5	0
		253.63	0
		253.76	0
		253.89	0
		254.02	0
		254.15	0
		254.28	0
		254.41	0
		254.54	0
		254.67	0
		254.8	0
		254.93	0
		255.06	0
		255.19	0
		255.32	0
		255.45	0
		255.58	0
		255.71	0
		255.84	0
		255.97	0
		256.1	0
		256.23	0
		256.36	0
		256.49	0
		256.62	0
		256.75	0
		256.88	0
		257.01	0
		257.14	0
		257.27	0
		257.4	0
		257.53	0
		257.66	0
		257.79	0
		257.92	0
		258.05	0
		258.18	0
		258.31	0
		258.44	0
		258.57	0
		258.7	0
		258.83	0
		258.96	0
		259.09	0
		259.22	0
		259.35	0
		259.48	0
		259.61	0
		259.74	0
		259.87	0
[truncated: 1 more rows]
